# Supplementary material
Source: MDPI journal article supplement (https://www.mdpi.com/2075-163X/10/3/242)

**Supplementary material S1 for the following article:**

Tonalite-dominated magmatism in the Abitibi Subprovince, Canada, and significance for Cu-Au magmatic-hydrothermal systems

by L. Mathieu ([lucie1.mathieu@ugac.ca](mailto:lucie1.mathieu@ugac.ca)), A. Crépon and D. Kontak

**Journal:** MDPI – Minerals

**Description:** Geology and chemistry of tonalite-dominated plutons of the Abitibi Subprovince

**Data source:**

- Sigeom dataset (<http://sigeom.mines.gouv.qc.ca>) - compiled by the *Ministère de l'Énergie et des Ressources Naturelles* of Québec (MERN)
- Ontario Geological Survey (OGS) data compiled by the Metal Earth project (<https://merc.laurentian.ca/research/metal-earth/superior-compilation>).
- Beakhouse, G. P. The Abitibi Subprovince plutonic record: Tectonic and metallogenic implications; Open File report 6268, Ontario Geological Survey, Sudbury, ON, Canada, 2011

## Eastern Abitibi Subprovince

(Sigeom dataset, MERN)

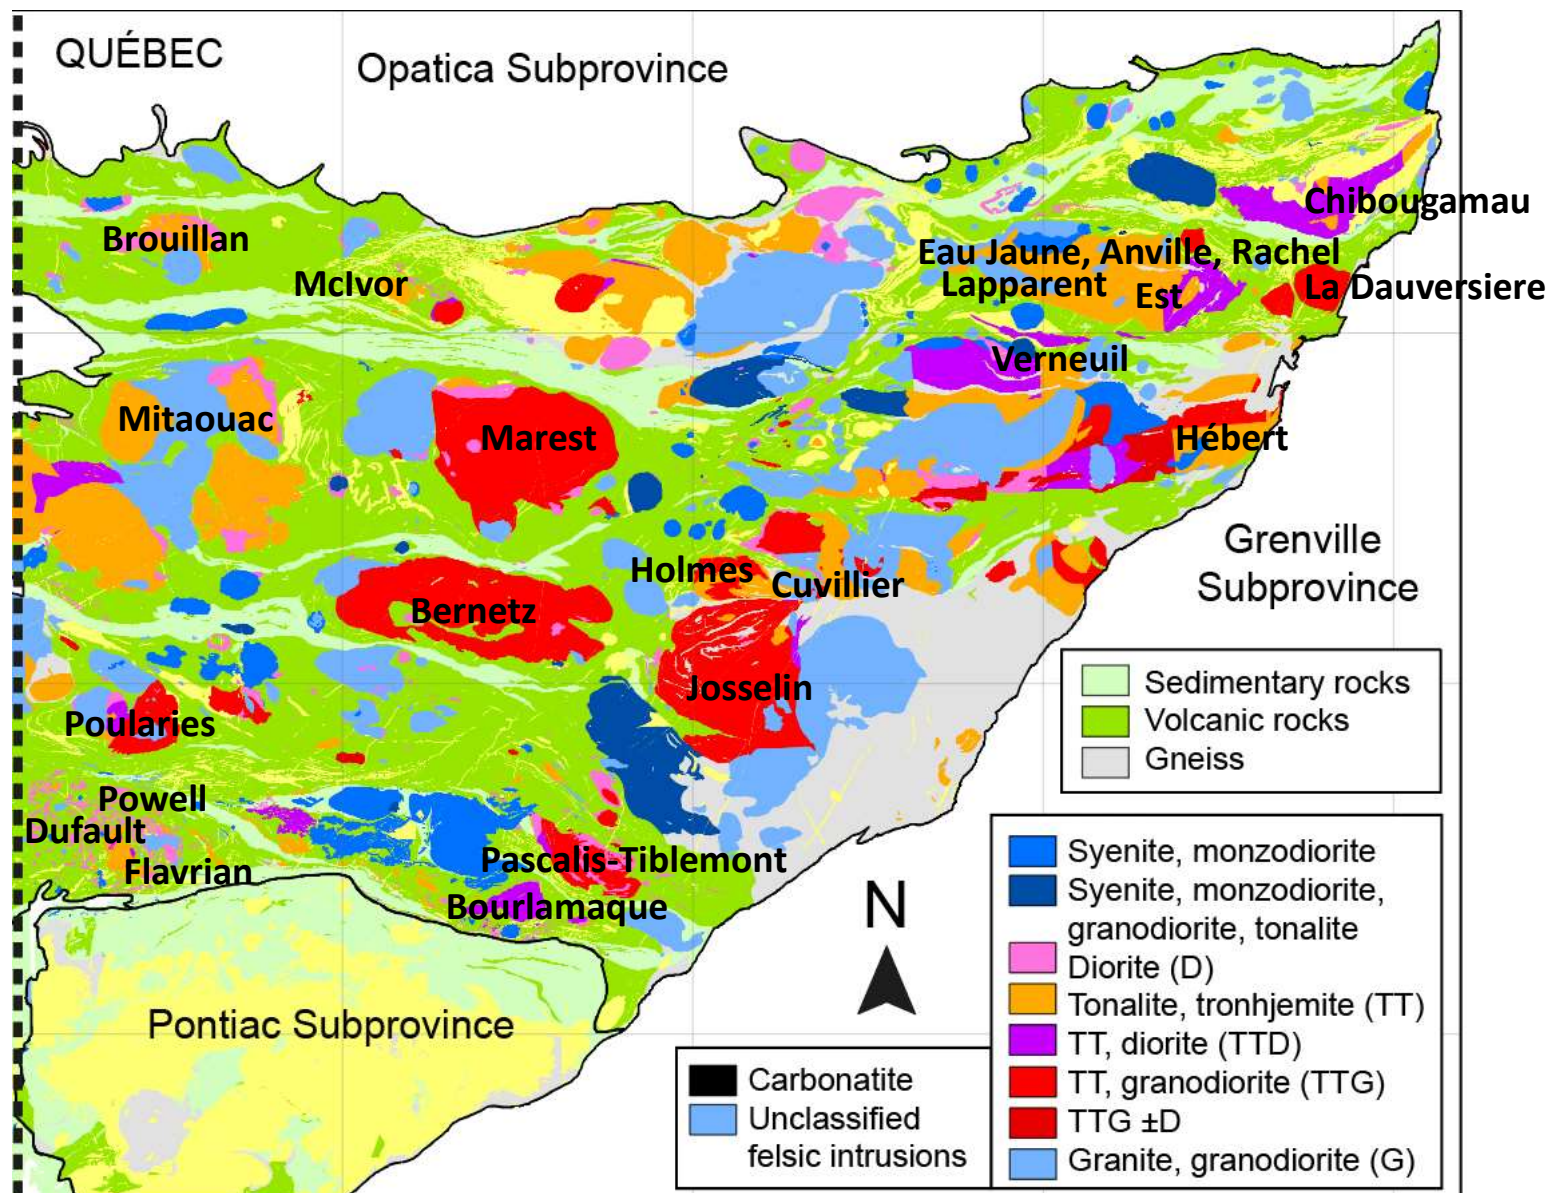

**Figure 1** (see manuscript for details)

## Intermediate and felsic intrusions characterized by $(\text{La}/\text{Yb})_N > 6$

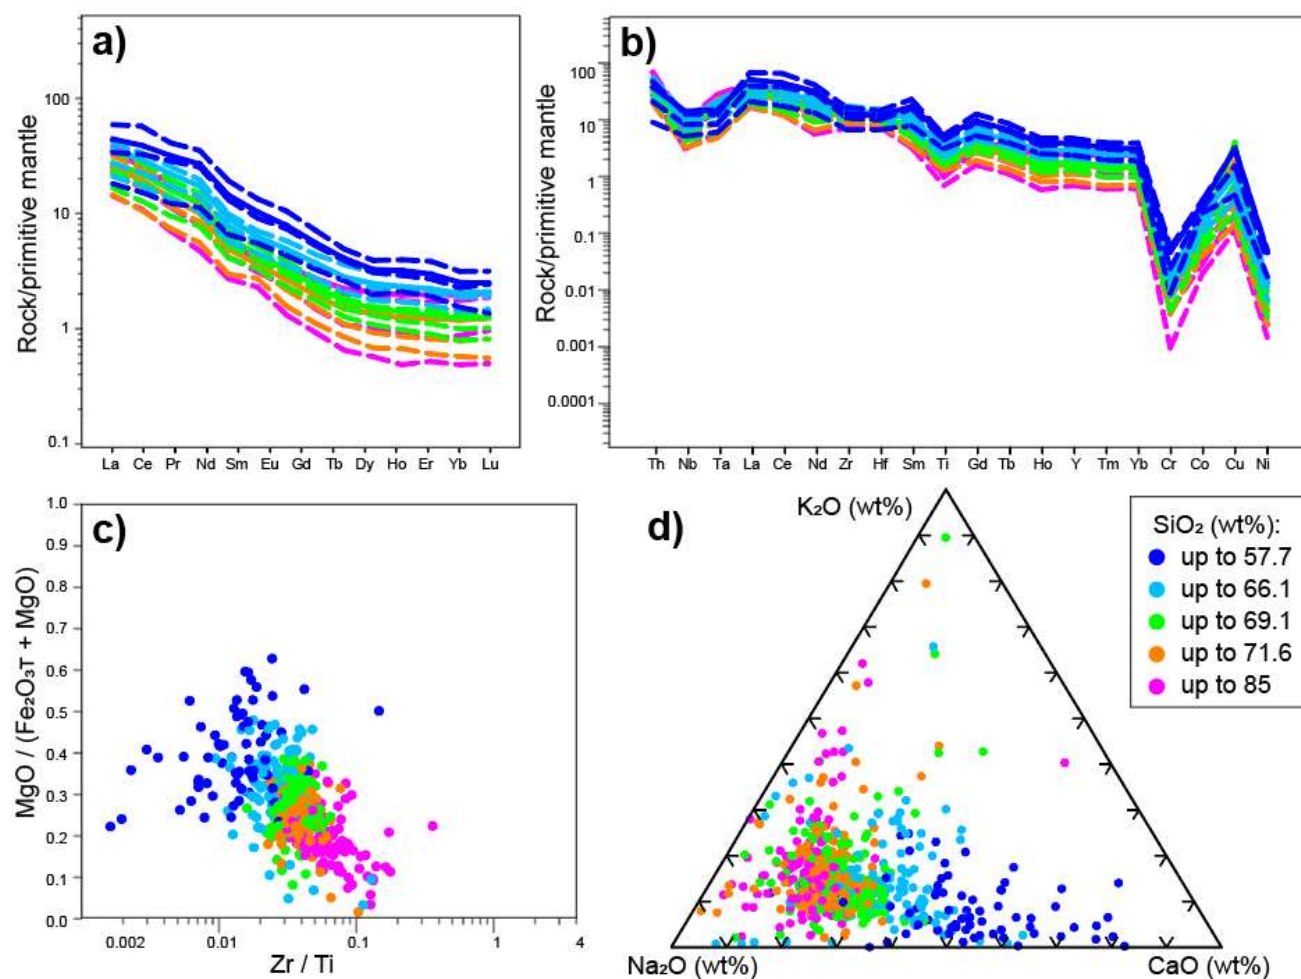

**Figure 5** (see manuscript for details)



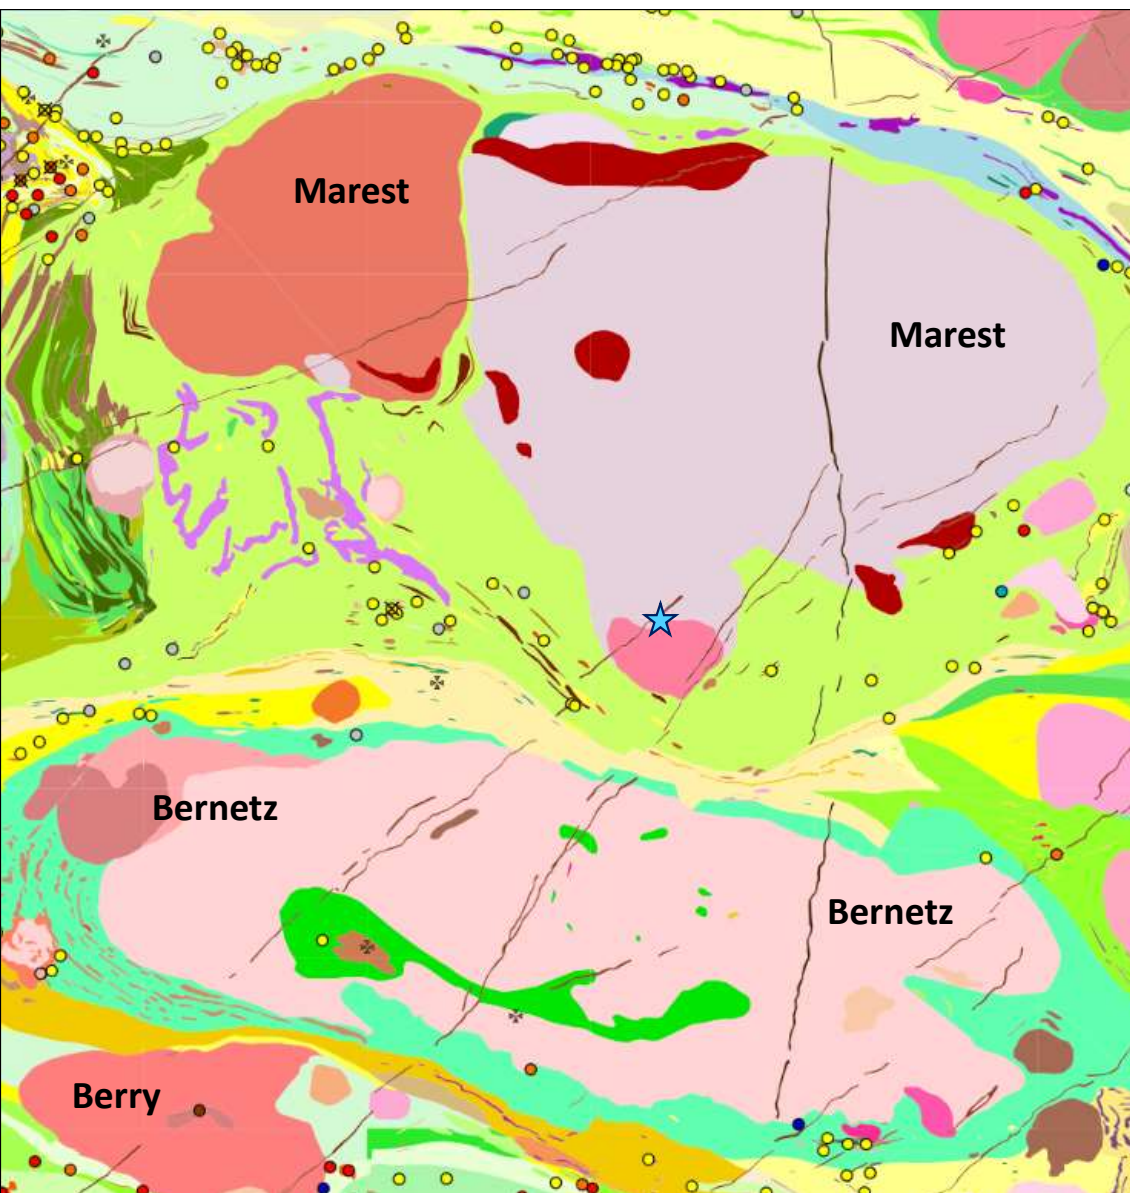

### Marest intrusive suite

- Granodiorite and tonalite (Bt-Hnbl) – 68.7%
- Granodiorite (Bt) – 2.0%
- Granite or granodiorite – 23.9%
- Diorite  $\pm$ Qz, Plag phenocryst – 5.4%

### Bernetz intrusion

- Granodiorite and tonalite Bt ( $\pm$ gneiss) – 91.5%
- Granodiorite and granite with Qz-Fsp phenocrysts, Hnbl – 4.4%
- Granodiorite Bt-Hnbl (gneiss) – 3.1%
- Diorite  $\pm$ Qz, Hnbl – 1%

- Age U-Pb (granodiorite):  
★ **2705  $\pm$  1 Ma** (*Rhéaume et al. 2010 – MB-2010-06*)

10 km

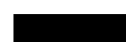

## Marest and Bernetz intrusive suites

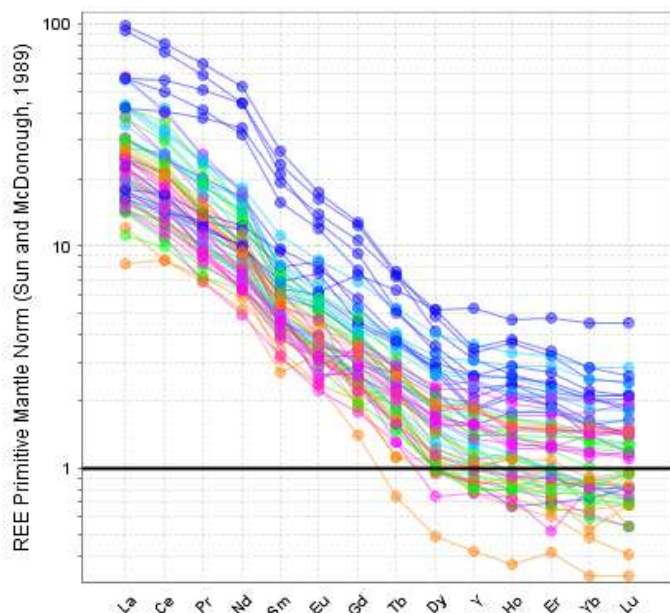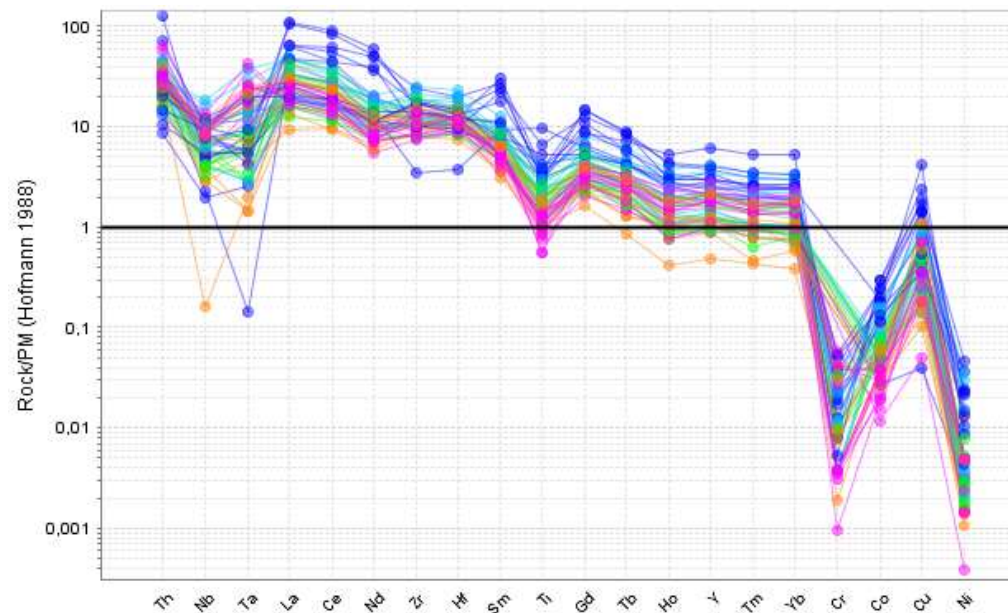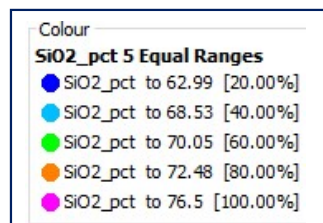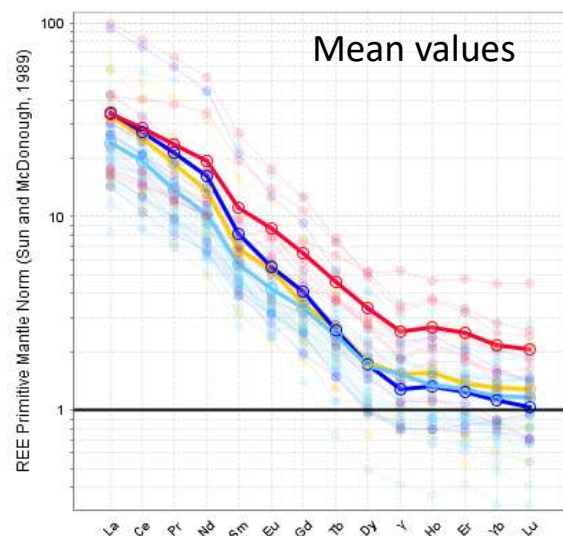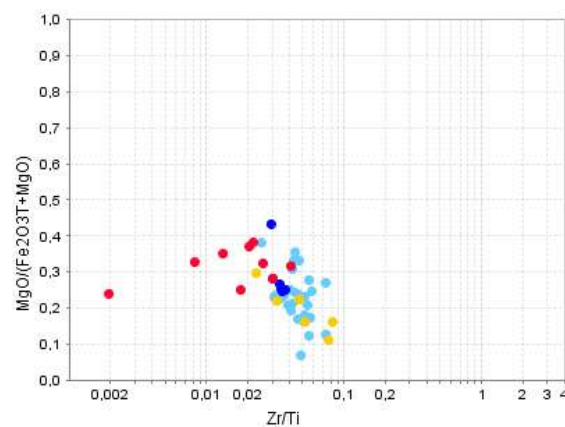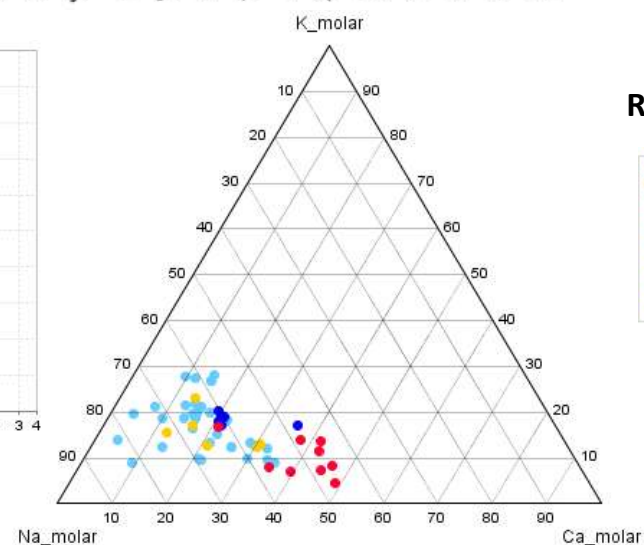

## Rock names (field)

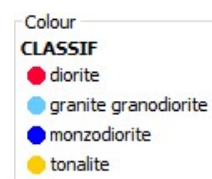

(unclassified rocks are not displayed)



**Holmes pluton**

- Tonalite (gneiss) – 0.8%
- Granodiorite, tonalite – 47.3%
- Tonalite – 48.4%
- Granodiorite – 1.5%
- Tonalite Hnbl-Bt – 1.9%

**Wilson pluton**

- Diorite Qz – 5.6%
- Diorite – 1.8%
- Diorite – 0.1%
- Tonalite Bt (gneiss) – 44.5%
- Granodiorite, tonalite – 48%

**Stouart pluton**

- Tonalite, diorite – 3.2%
- Tonalite – 12.1%
- Granodiorite Bt-Hnbl – 65.8%
- Granite Bt – 18.9%

**Cuvillier pluton**

- Granodiorite Bt – 27.4%
- Tonalite Bt-Hnbl – 72.6%

**Corriveau pluton**

- Tonalite Bt – 33.2%
- Granodiorite Bt-Hnbl – 66.8%

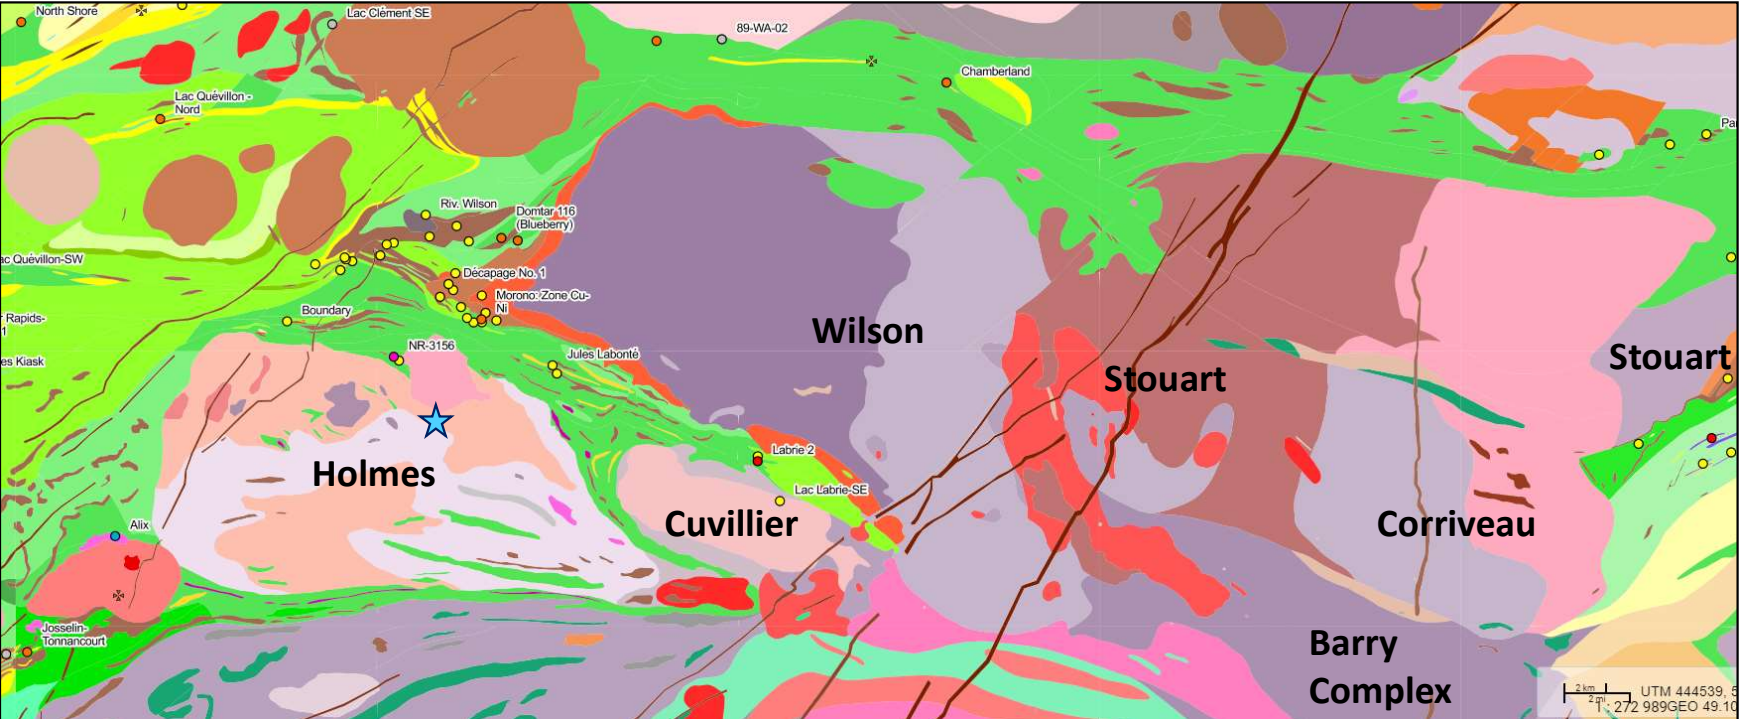

• Age U-Pb (granodiorite):  
★ 2727 ± 7 Ma (Roffeis 2019)

## Holmes pluton

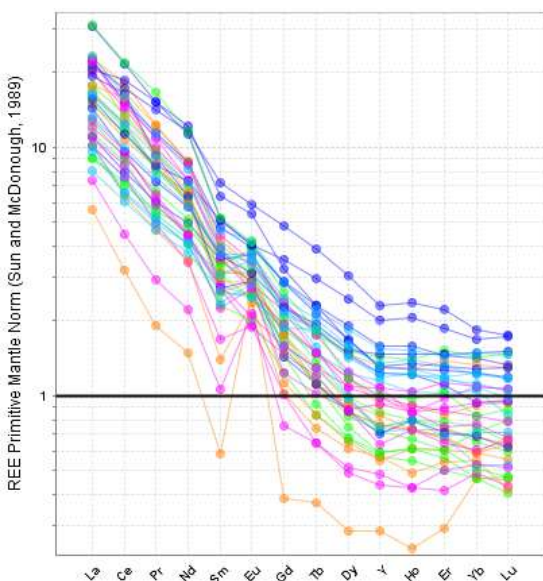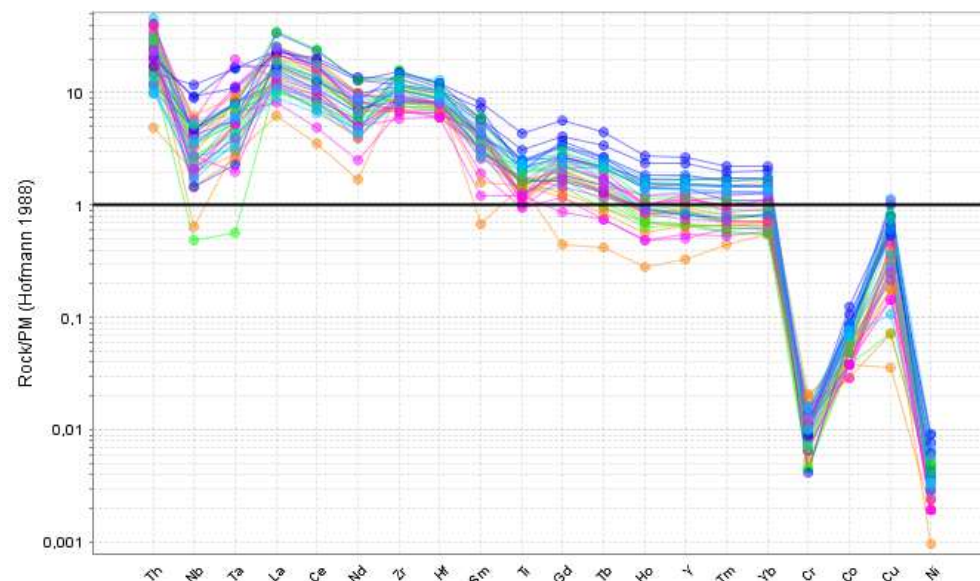

**SiO<sub>2</sub>\_pct 5 Equal Ranges**

- SiO<sub>2</sub>\_pct to 66.97 [20.00%]
- SiO<sub>2</sub>\_pct to 68.92 [40.00%]
- SiO<sub>2</sub>\_pct to 70.53 [60.00%]
- SiO<sub>2</sub>\_pct to 71.34 [80.00%]
- SiO<sub>2</sub>\_pct to 73.6 [100.00%]

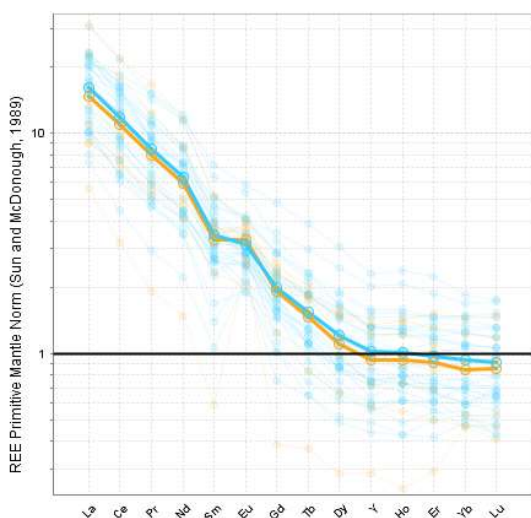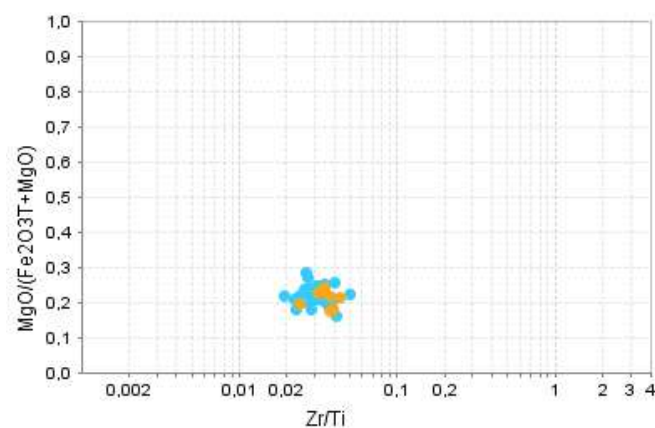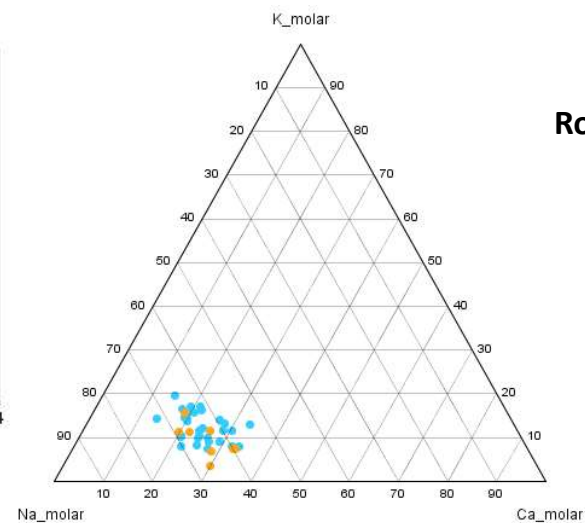

## Rock names (field)

**CODE\_ROCH**

- granodiorite
- tonalite

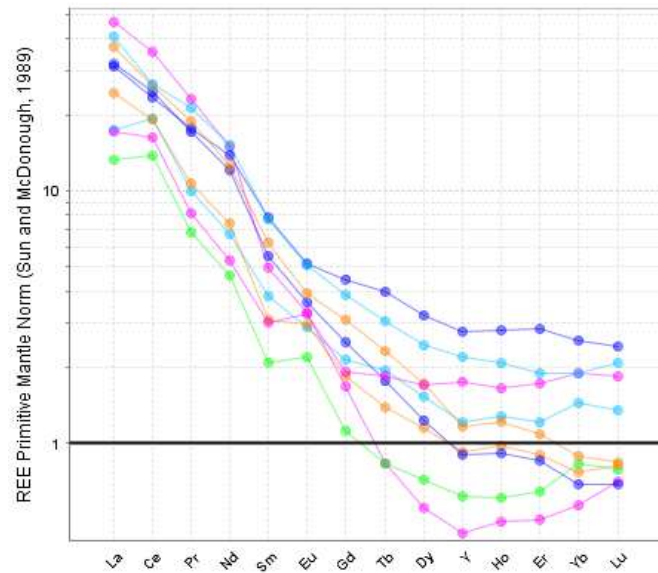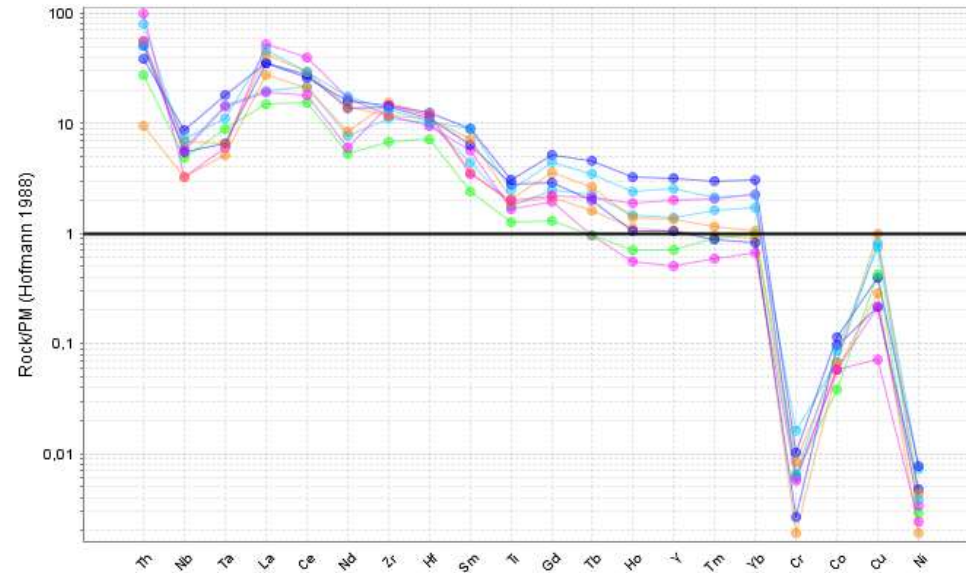

## Cuvillier pluton

**SiO<sub>2</sub>\_pct 5 Equal Ranges**

- SiO<sub>2</sub>\_pct to 66.65 [20.00%]
- SiO<sub>2</sub>\_pct to 69.34 [40.00%]
- SiO<sub>2</sub>\_pct to 69.53 [60.00%]
- SiO<sub>2</sub>\_pct to 70.42 [80.00%]
- SiO<sub>2</sub>\_pct to 71.06 [100.00%]

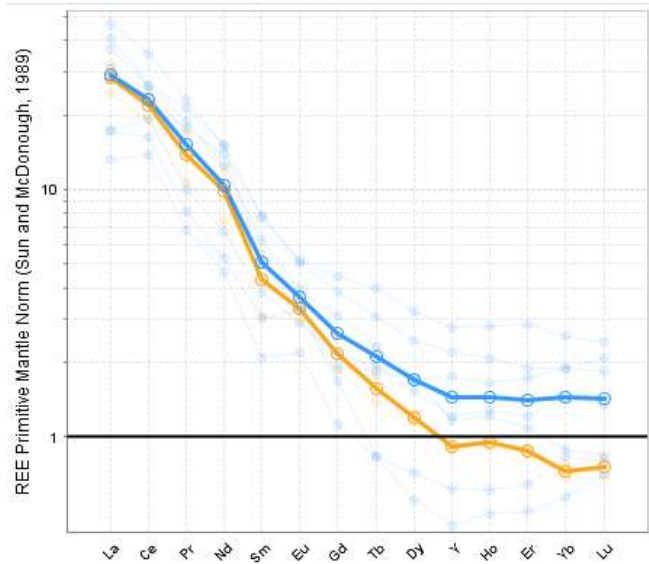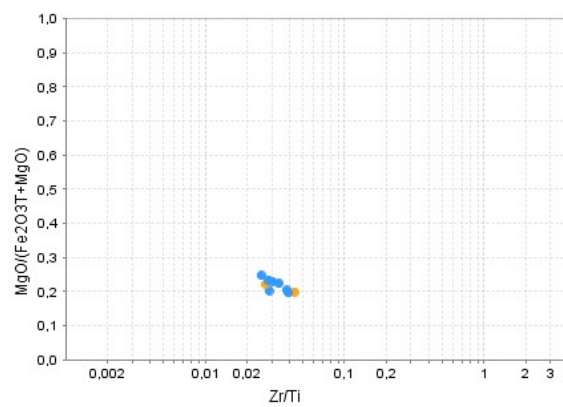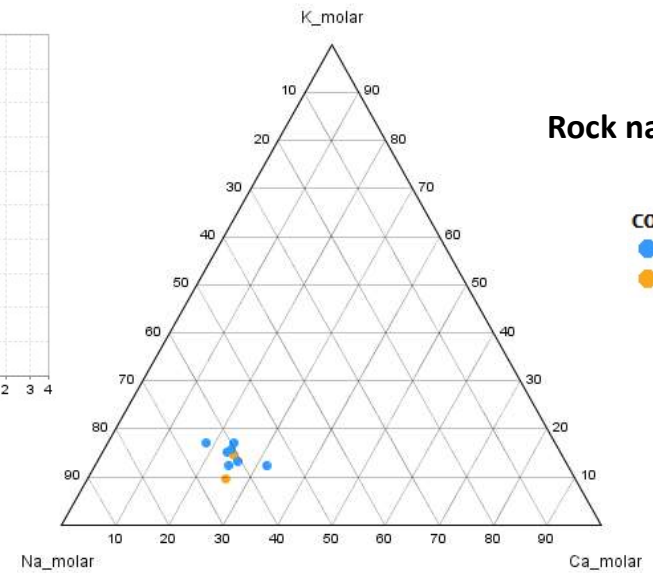

## Rock names (field)

**CODE\_ROCH**

- granodiorite
- tonalite



### Waswanipi Riv. pluton

Granodiorite

### Lapparent intrusive suite

Tonalite (gneiss)

### Rachel pluton

Tonalite Bt

### Eau Jaune Complex

Diorite, tonalite – 24%  
Tonalite, diorite – 67.2%  
Trondhjemite – 8.8%

### Houghton pluton

Monzodiorite – 46.3%  
Tonalite – 49.2%  
Diorite, tonalite – 3.6%  
Hornblendite – 0.9%

### Ouest granodiorite

Granodiorite

### Presqu'île pluton

Tonalite, granite

### Anville pluton

Tonalite – 86.6%  
Granodiorite – 13.4%

### Est tonalite

Tonalite Bt – 95.3%  
Granodiorite – 4.7%

Syenite, carbonatite

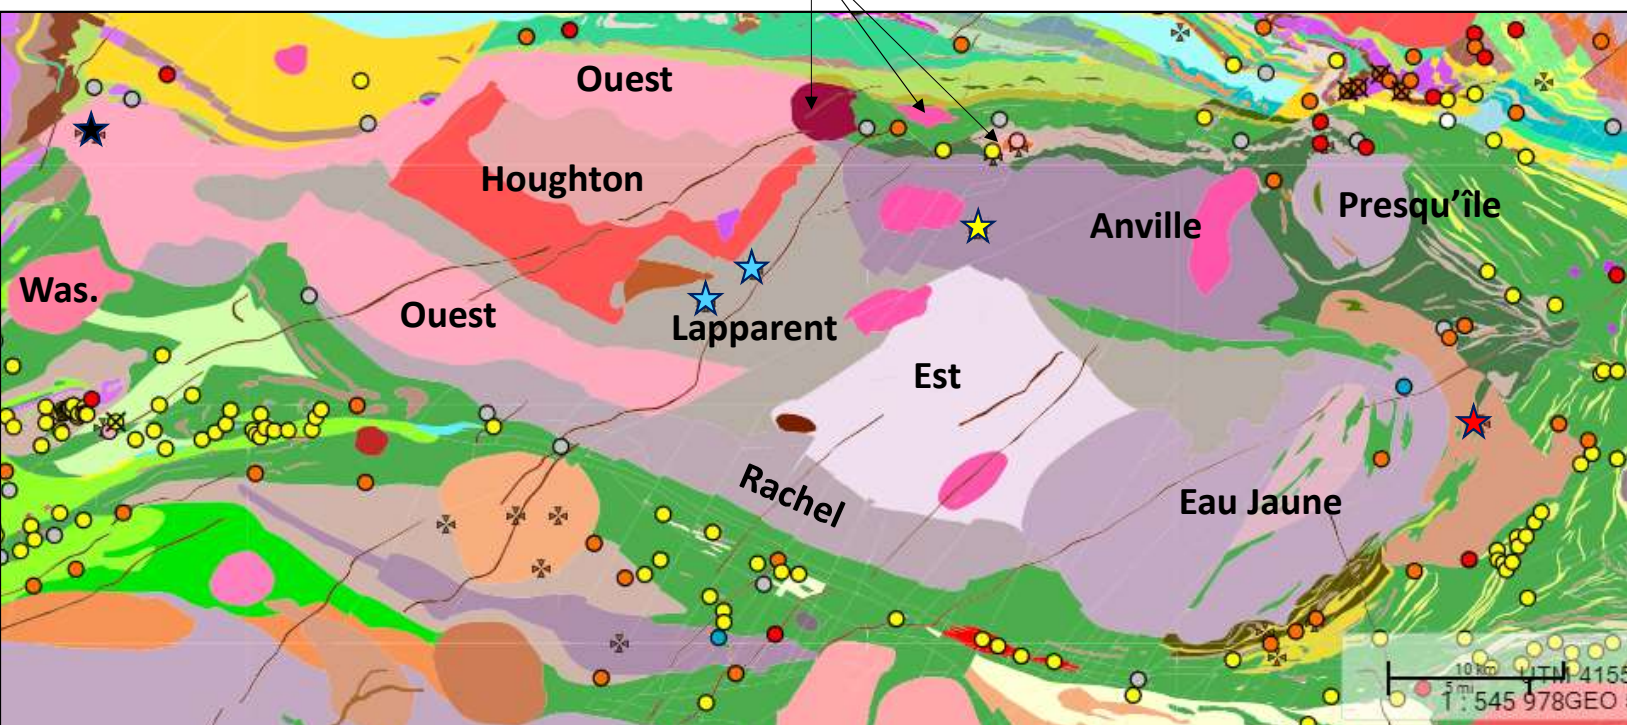

- Age U-Pb (tonalite):  
★  $2712 \pm 1 \text{ Ma}$ ,  $2713.4 \pm 2.5 \text{ Ma}$  (Mortensen 1993)
- Age U-Pb (granodiorite): ★  $2714.8 \pm 0.6 \text{ Ma}$  (Augland et al. 2016)
- Age U-Pb (tonalite): ★  $2700 \pm 2 \text{ Ma}$  (Mortensen 1993)
- Age U-Pb (diorite): ★  $2718.6 \pm 5.5 \text{ Ma}$  (David 2018)

East tonalite

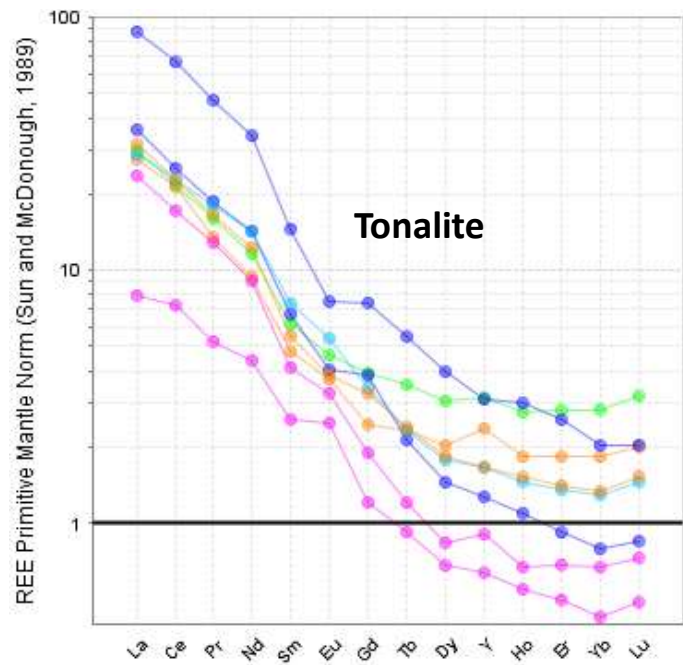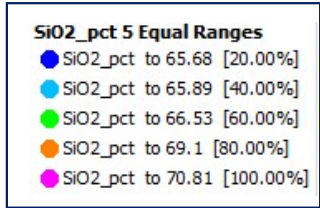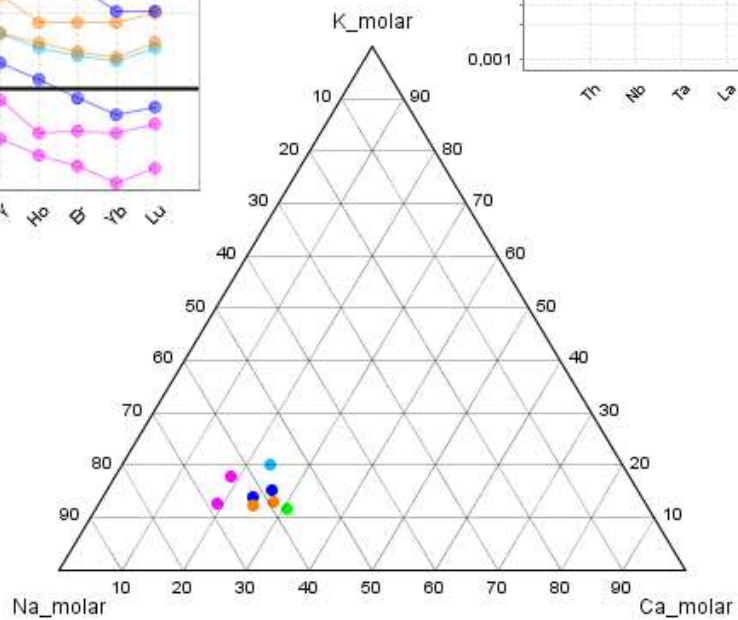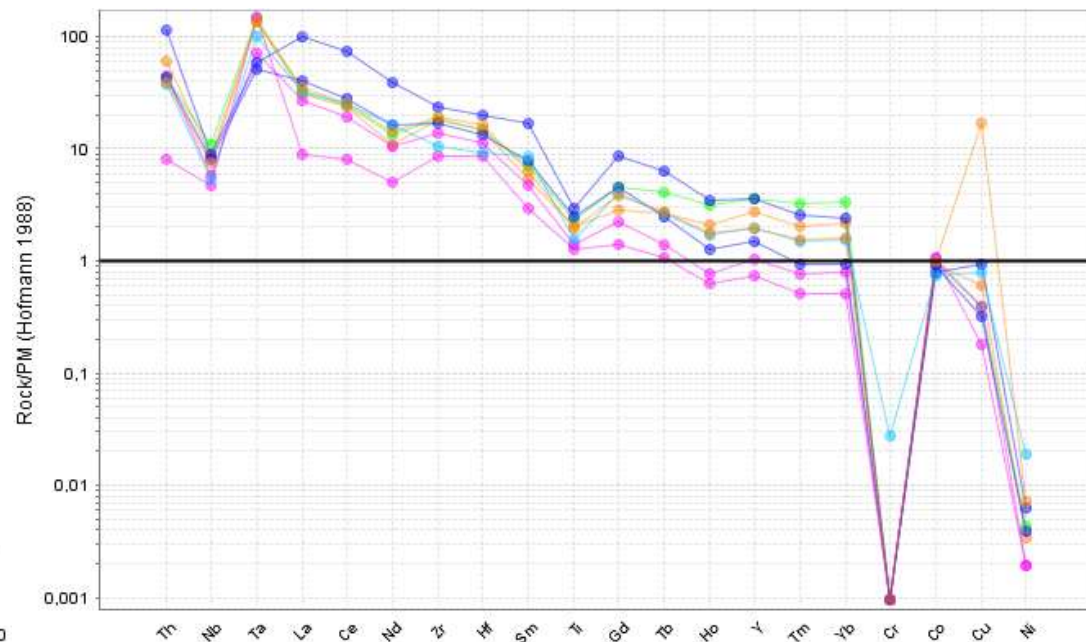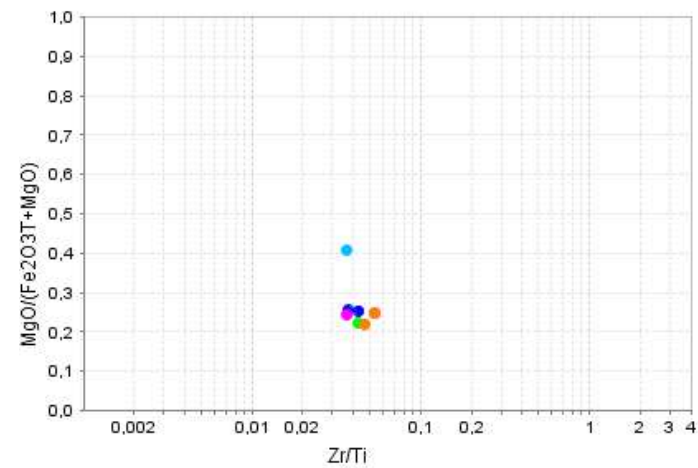



### Hazeur pluton

 Tonalite

### Muscocho pluton

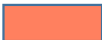 Granodiorite Hnbl

### Verneuil pluton

 Tonalite, granodiorite

### La Dauversière pluton

 Tonalite, granodiorite

### Boisvert pluton

 Tonalite, granodiorite

### Némenjiche pluton

 Tonalite

### Unnamed

 Tonalite

### Chico stock

 Tonalite

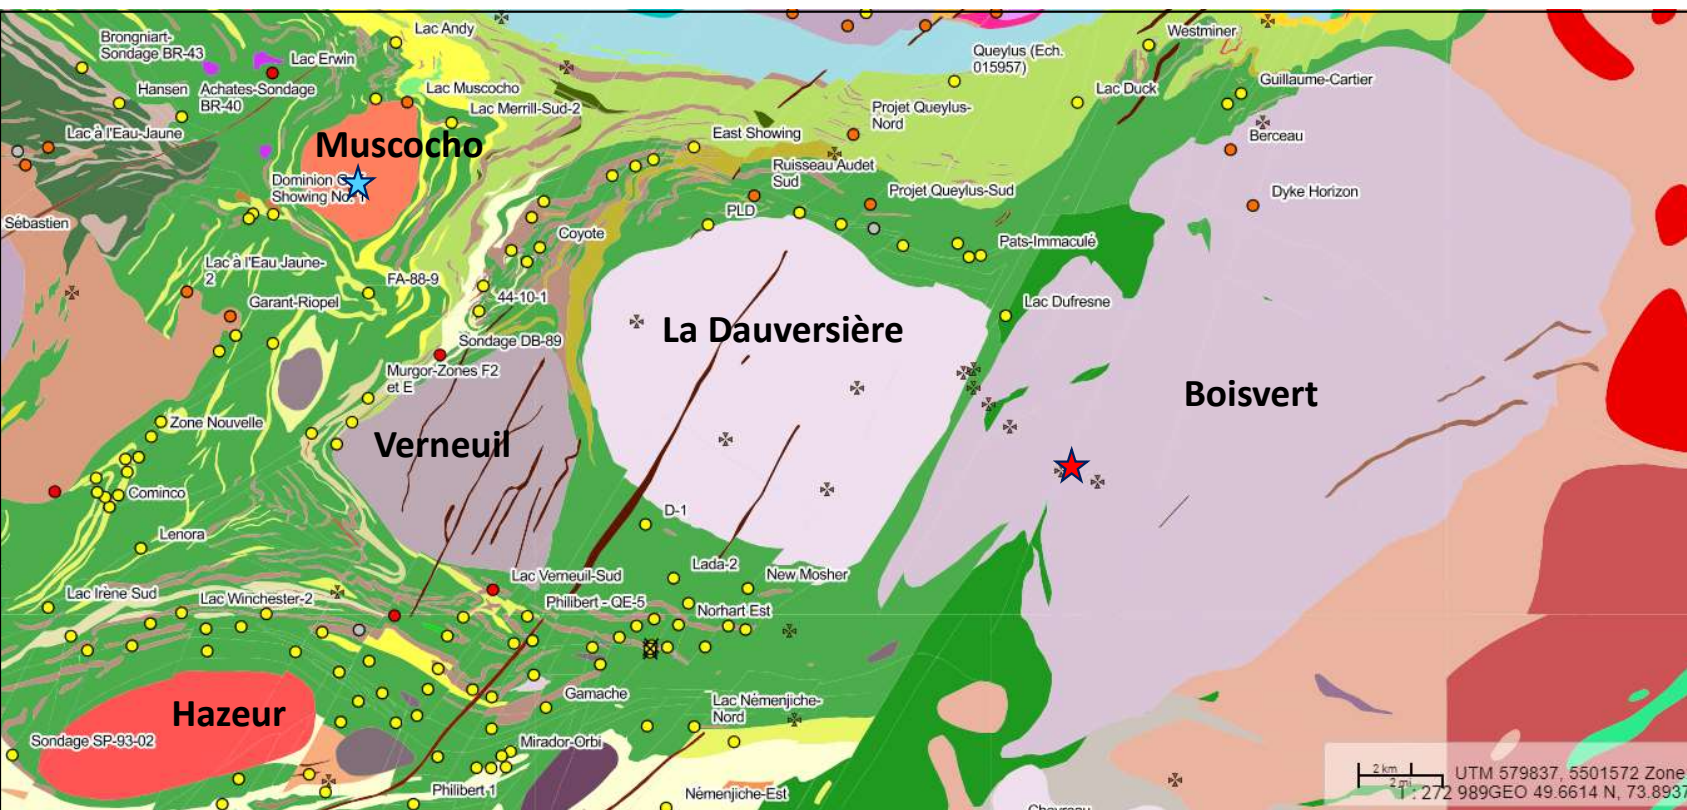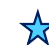

- Age U-Pb (granodiorite):  
**2701  $\pm$  2, -1 Ma**  
(Mortensen 1993)

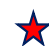

- Age U-Pb:  
**2697  $\pm$  3 Ma**  
(Davis et al. 2005)



Verneuil pluton

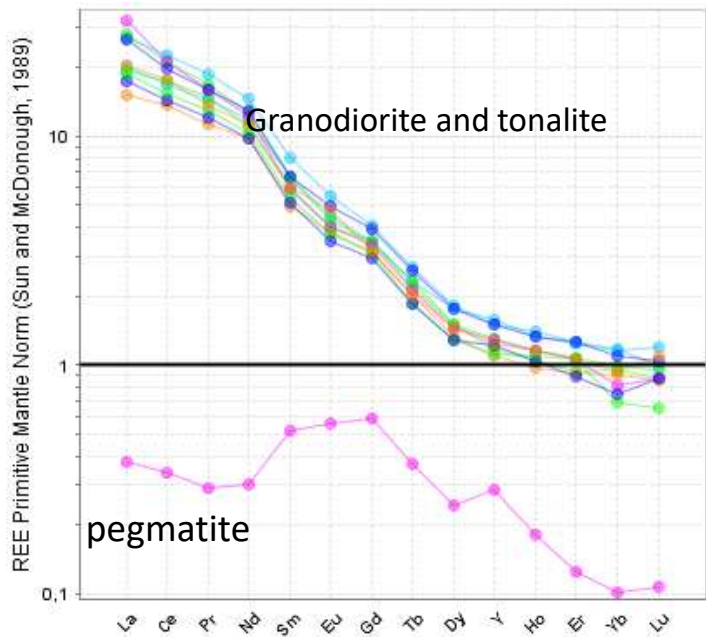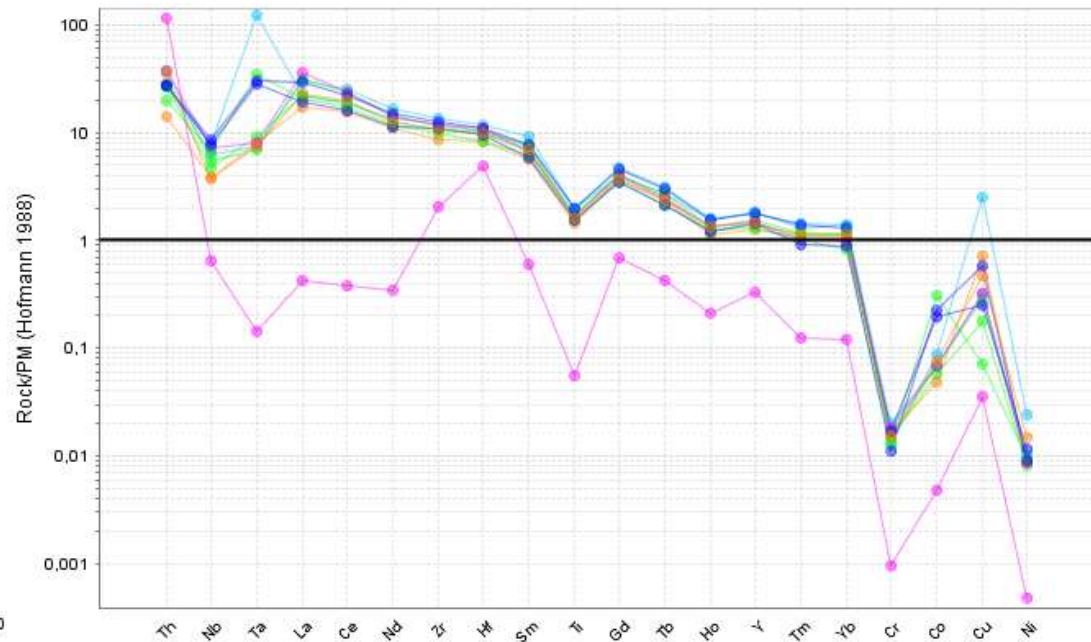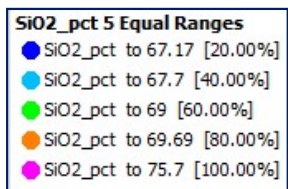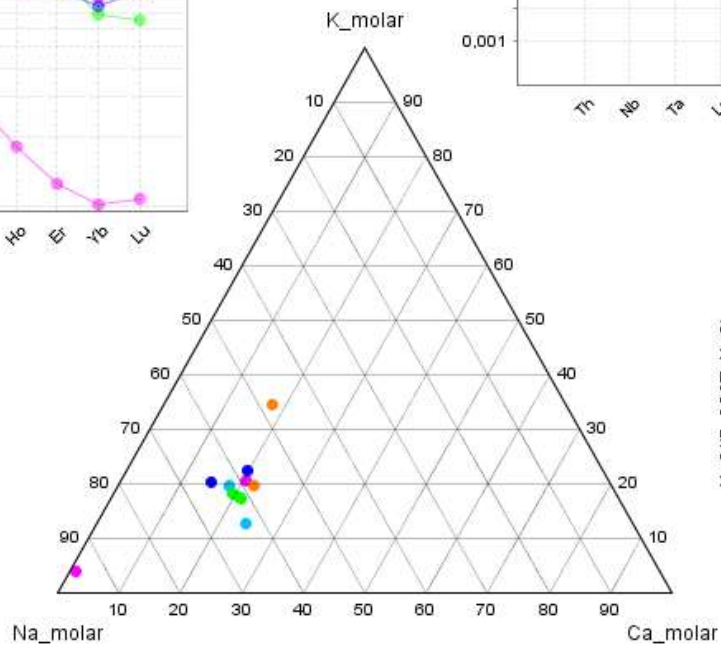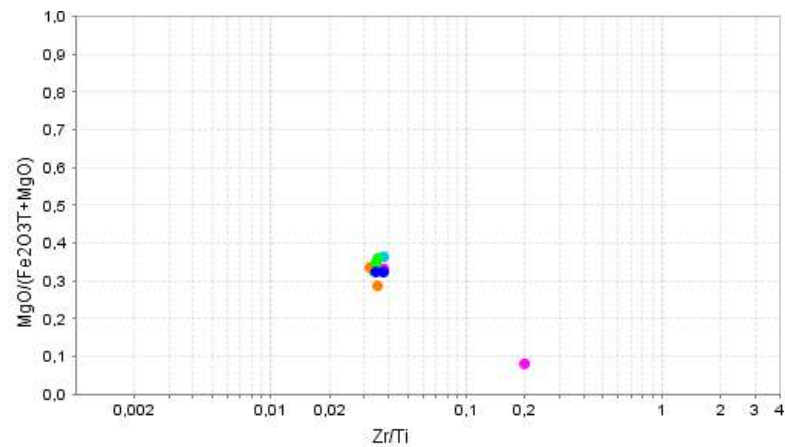





REE Primitive Mantle Norm (Sun and McDonough, 1989)

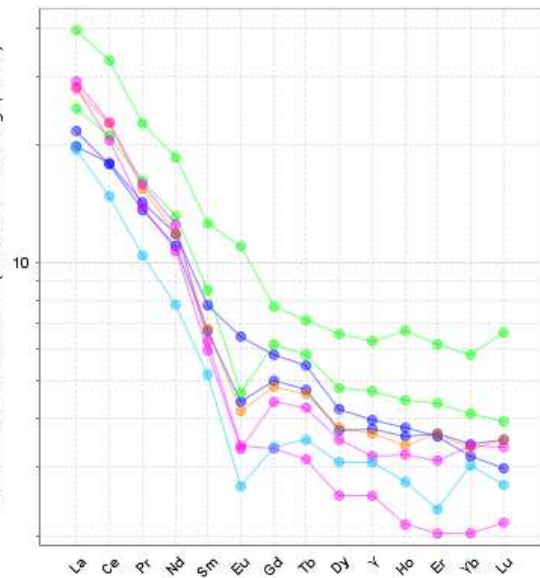

REE Primitive Mantle Norm (Sun and McDonough, 1989)

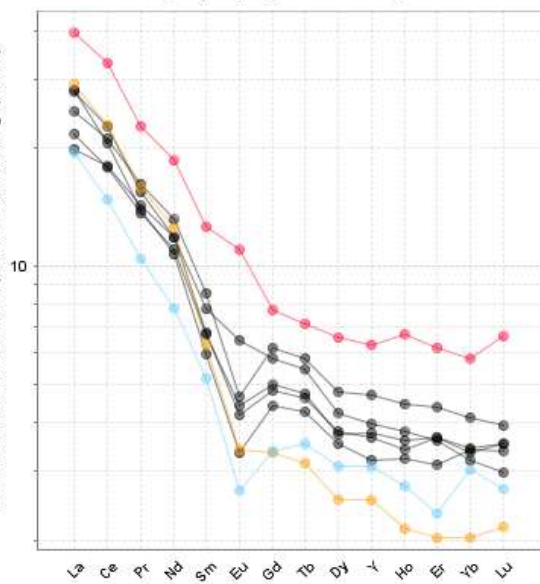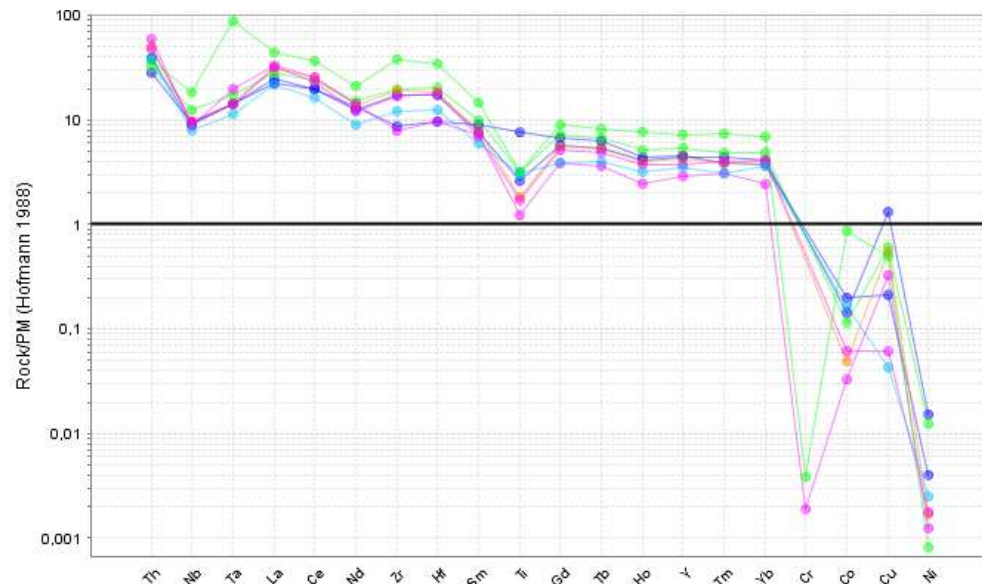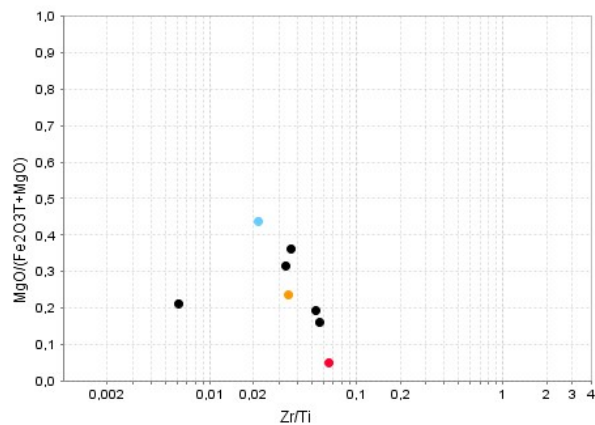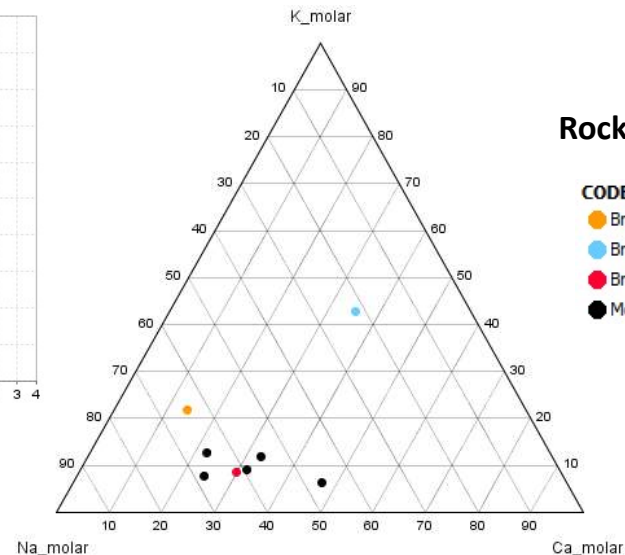

## McIvor and Brouillan pluton

### SiO<sub>2</sub>\_pct 5 Equal Ranges

- SiO<sub>2</sub>\_pct to 65.81 [20.00%]
- SiO<sub>2</sub>\_pct to 68.48 [40.00%]
- SiO<sub>2</sub>\_pct to 70.8 [60.00%]
- SiO<sub>2</sub>\_pct to 72.44 [80.00%]
- SiO<sub>2</sub>\_pct to 73.24 [100.00%]

### Rock names (field)

- CODE\_ROCH
- Brouillan (granodiorite)
  - Brouillan (intermediate rock)
  - Brouillan (tonalite)
  - McIvor (tonalite)





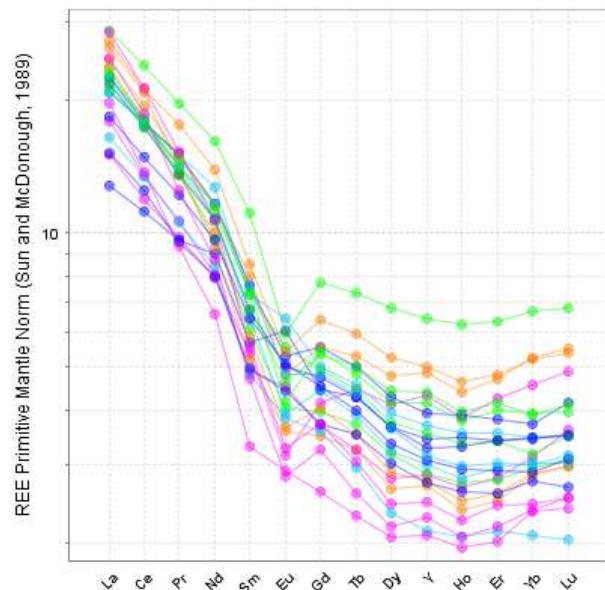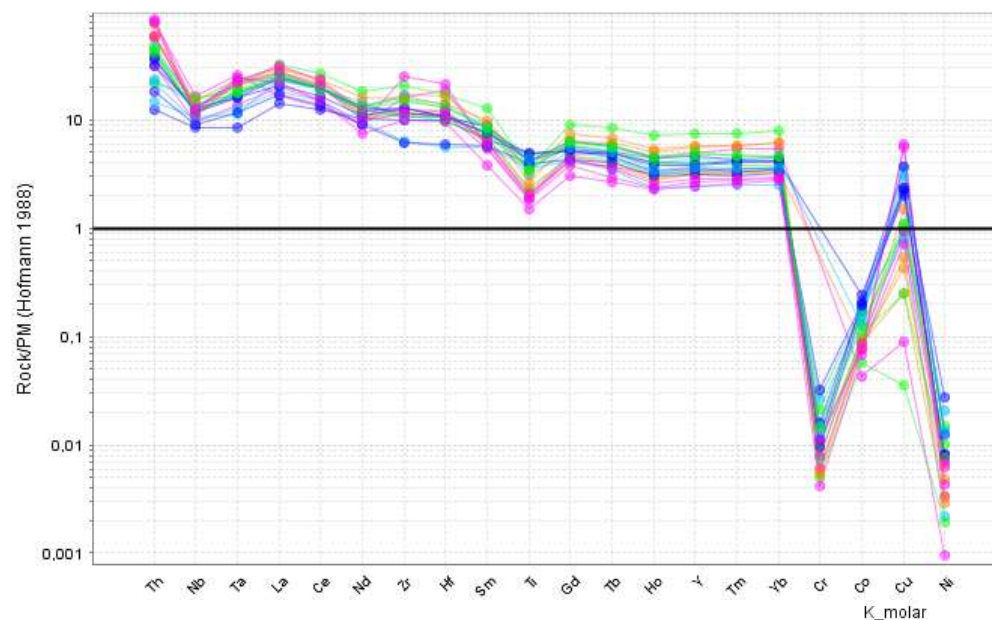

Dufault pluton

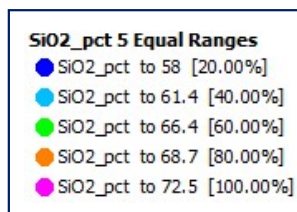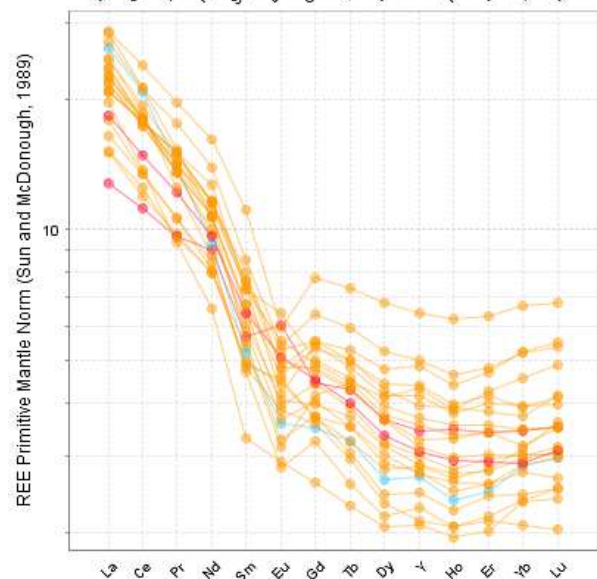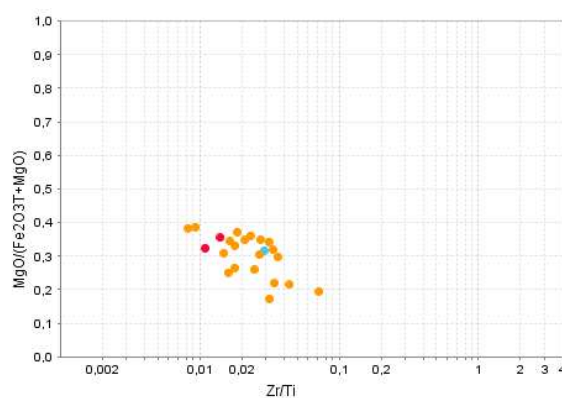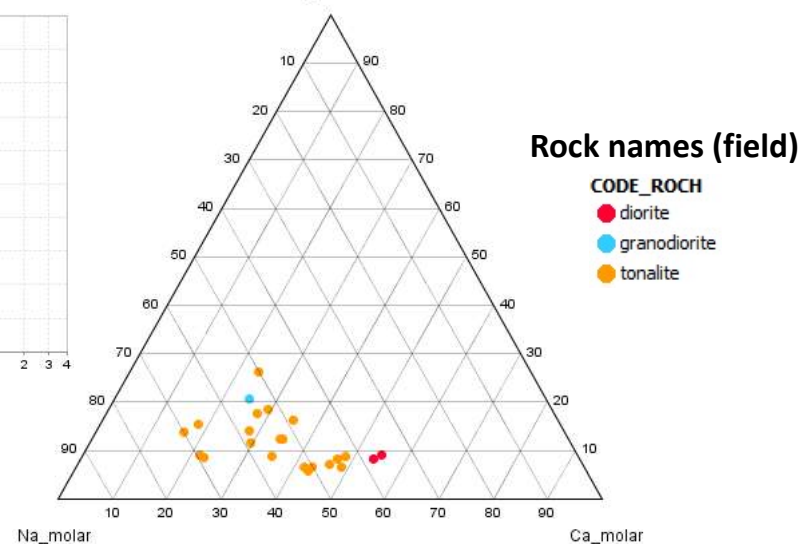

## Colombourg, Palmarolle and Poularies plutons

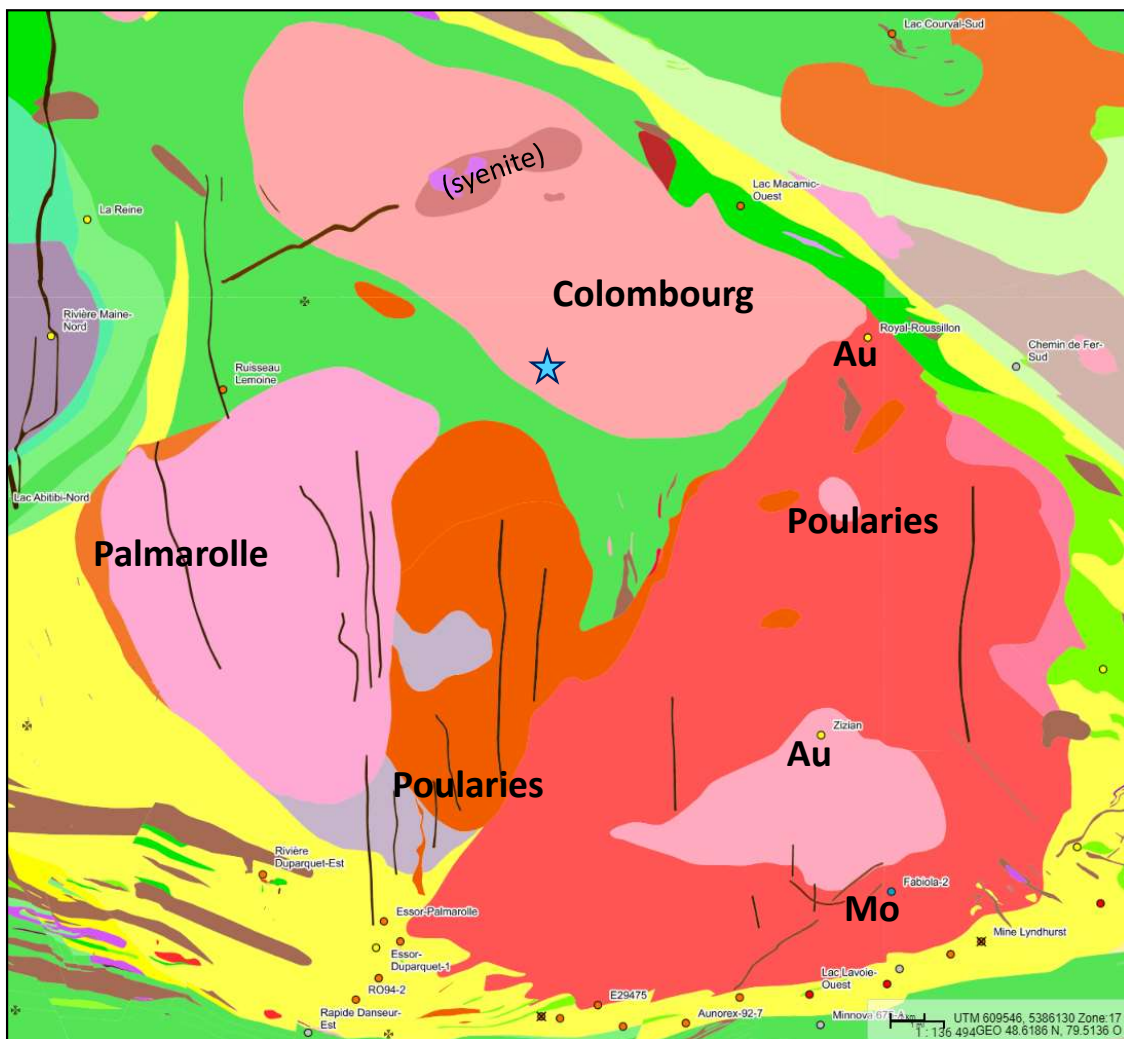

### Colombourg batholith

Granite and granodiorite Bt-Hnbl – 100%

### Palmarolle pluton

Granodiorite Bt, Plag porphyry – 94.9%

Diorite – 5.1%

### Poularies pluton

Tonalite and granite Bt-Hnbl – 65.8%

Granodiorite – 9.5%

Diorite  $\pm$  trondhjemite injections – 17.6%

Tonalite Bt-Hnbl – 4.1%

Migmatite? – 3.0%

- Age U-Pb (granodiorite): 2696  $\pm$  3, -2 Ma (Mortensen 1993)

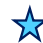

**Au** Au, Cu, Mo showings – magmatic-hydrothermal systems (possibly)  
**Mo**



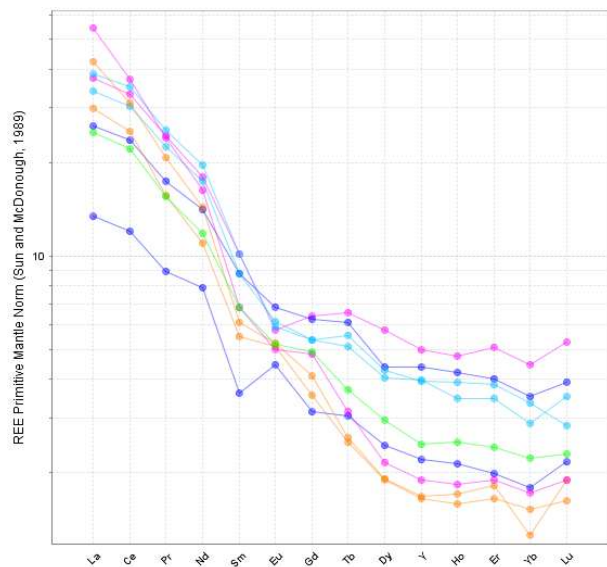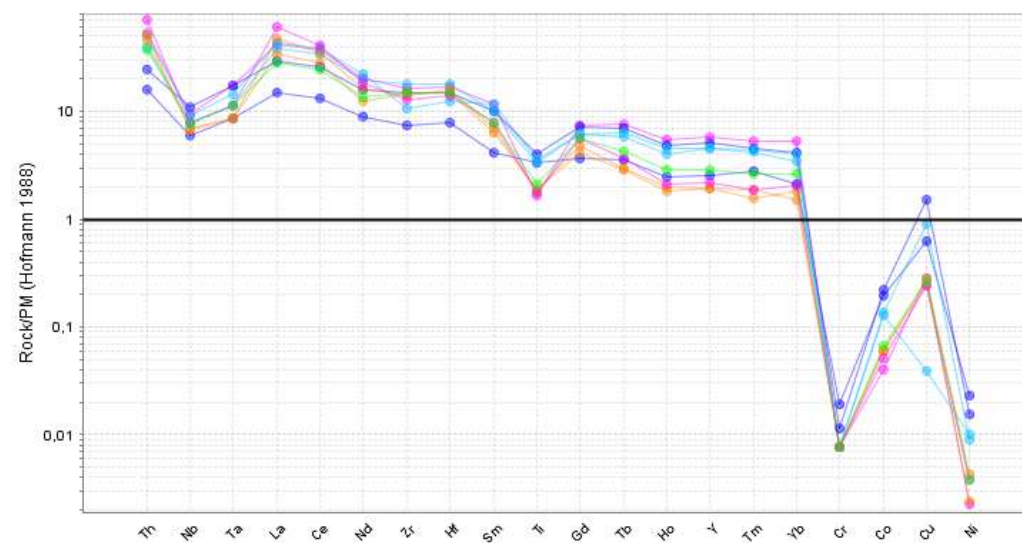

## Poularies pluton

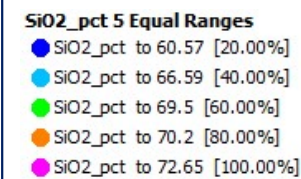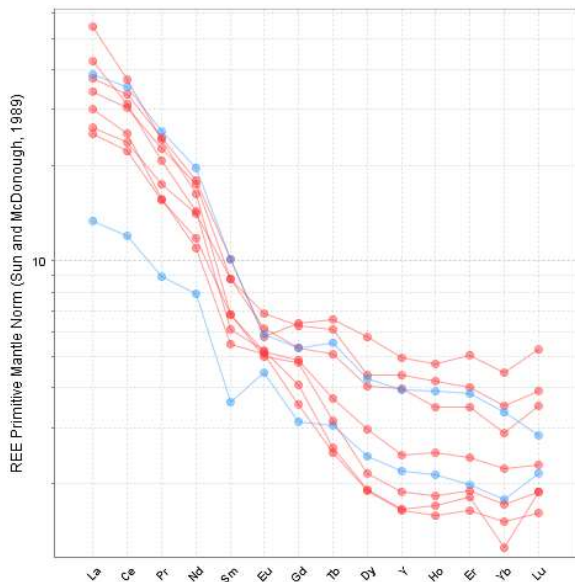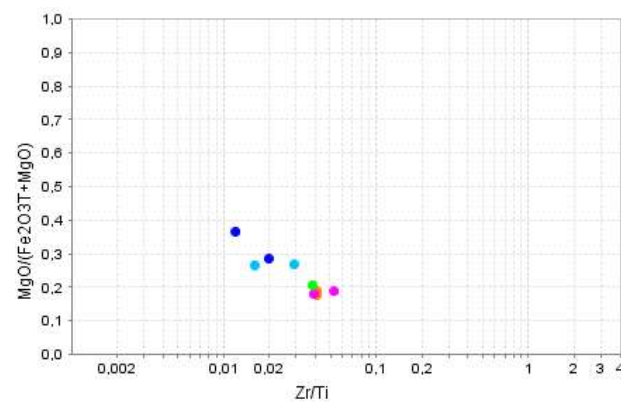

■ Tonalite  
■ Diorite

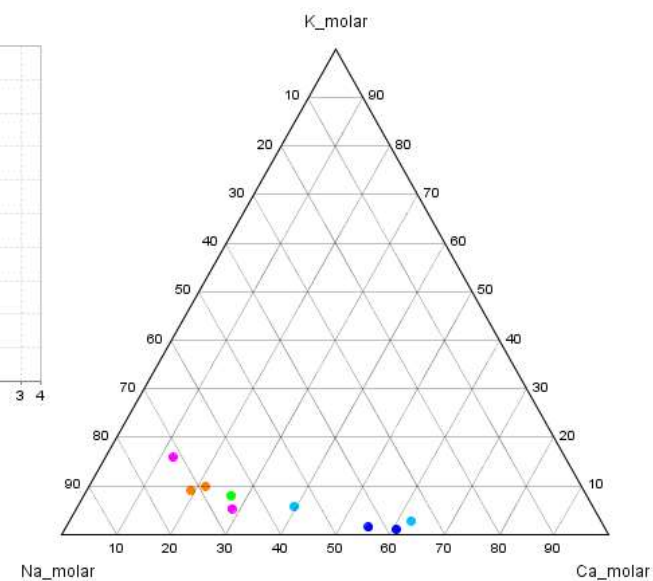

## Intermediate and felsic intrusions made of $(La/Yb)_N > 6$ and $(La/Yb)_N < 6$ rocks

Figures 5 and 6 (see manuscript for details)

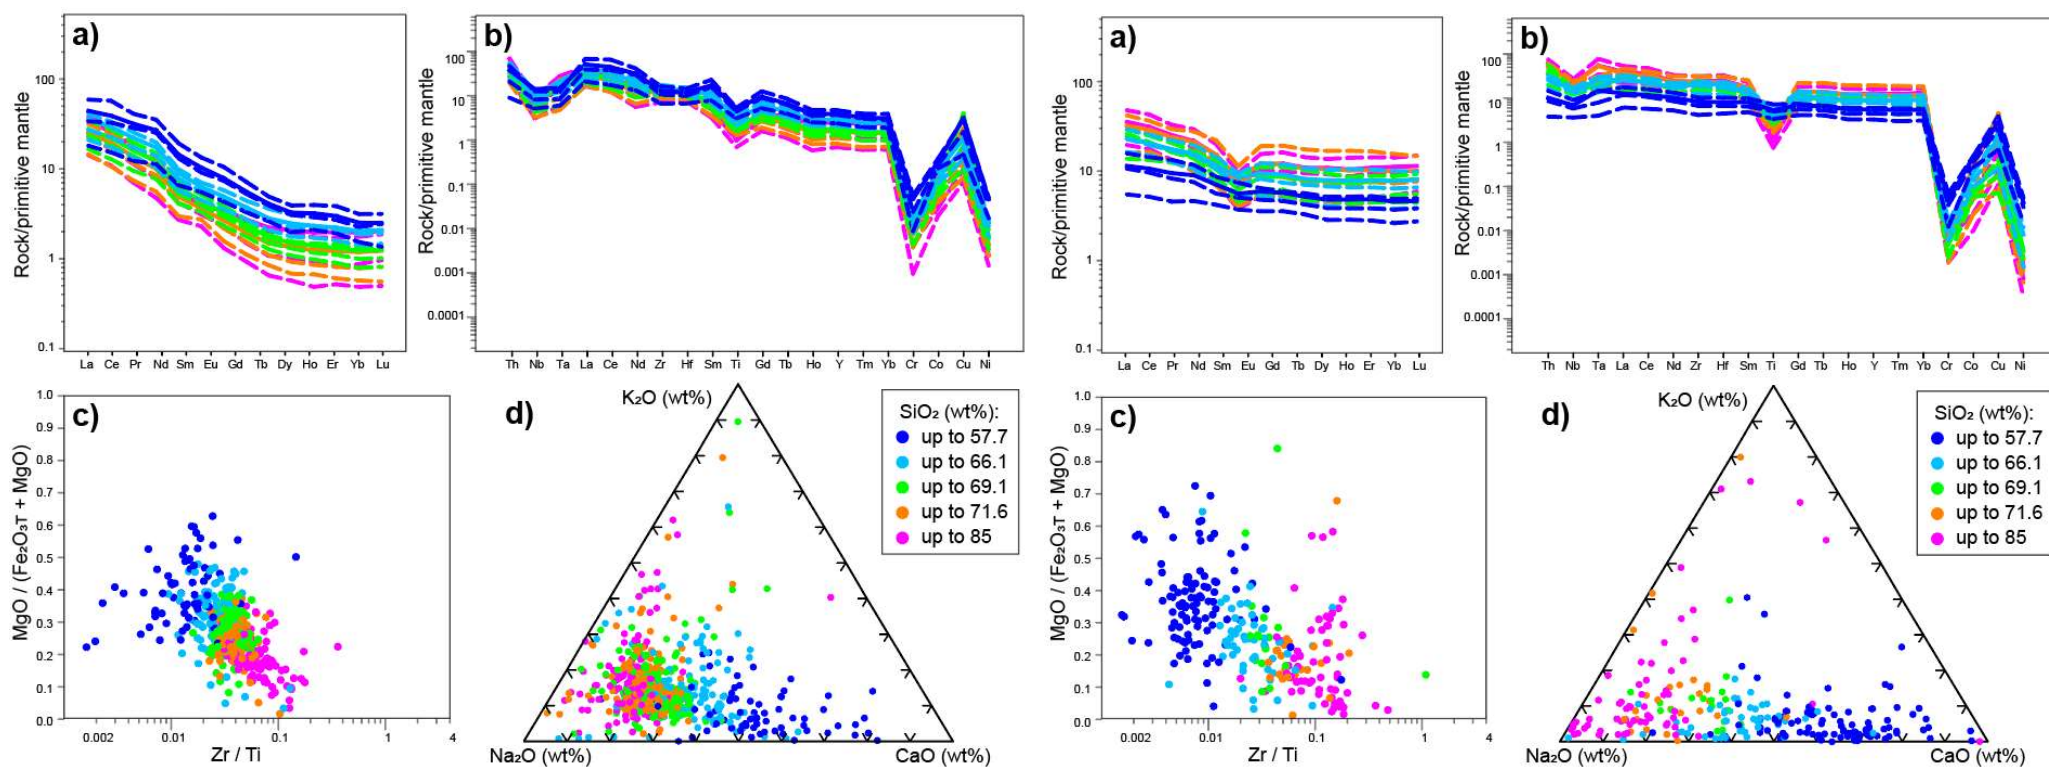

## Josselin batholith and Montgay batholith

### Josselin batholith

- Tonalite, diorite, granodiorite Bt-Amp (gneiss) – 12.5%
- Tonalite, granodiorite Bt-Hnbl (gneiss) – 87.0%
- Diorite  $\pm$ Qz – 0.5%

### Montgay batholith

- Granodiorite, tonalite, granite, monzonite, diorite – 97.9%
- Granite – 2.1%

### Castonguay suite

- Granite Bt-Ab
- Granite gneiss
- Granite

### Attic Complex

- Tonalite
- Granodiorite, granite, tonalite
- Gneiss Qz-Fsp-Bt
- Gneiss Bt-Amp
- Amphibolite
- Granite gneiss Amph
- paragneiss
- paragneiss

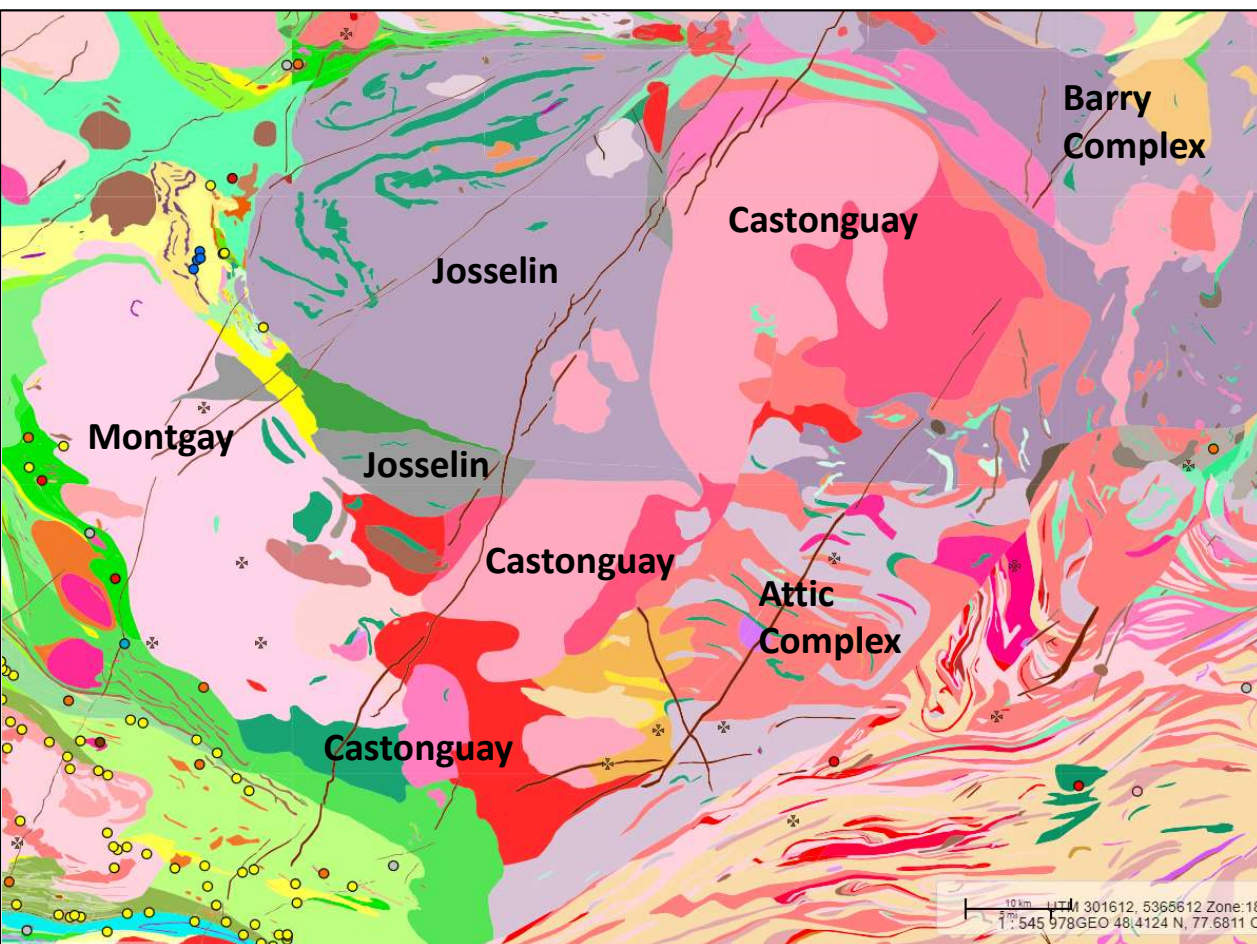



## Josselin batholith

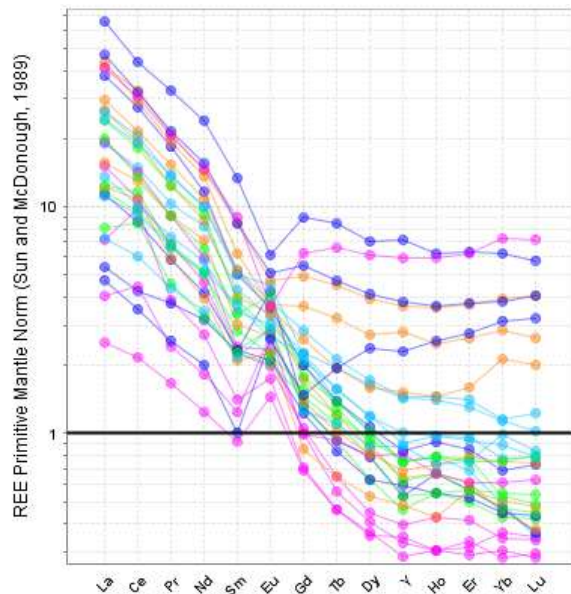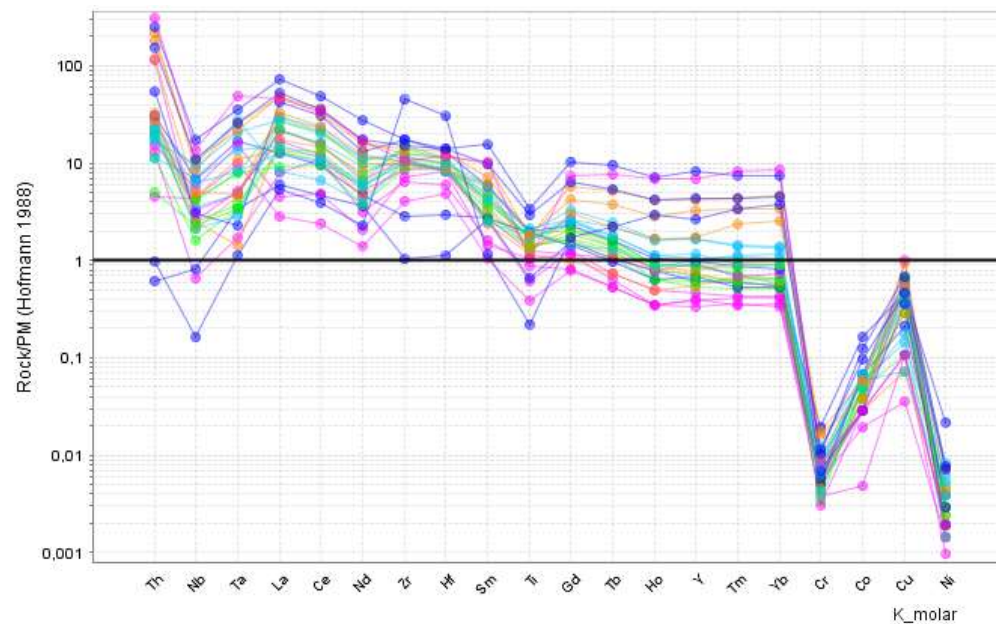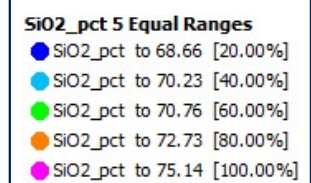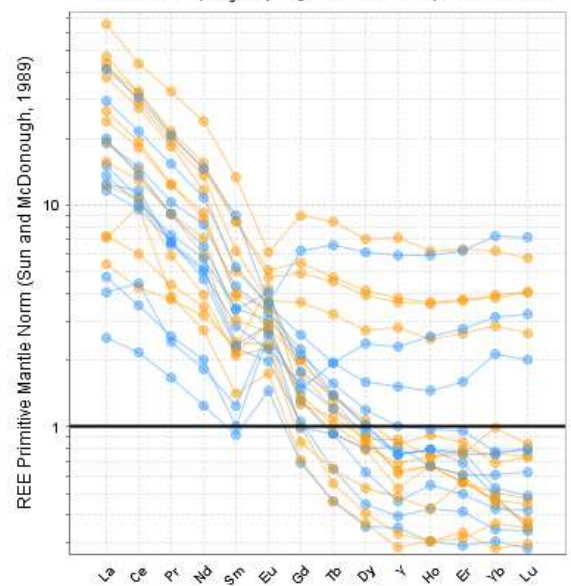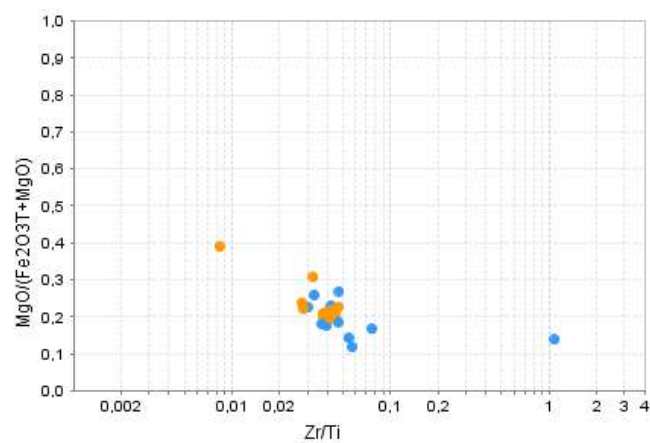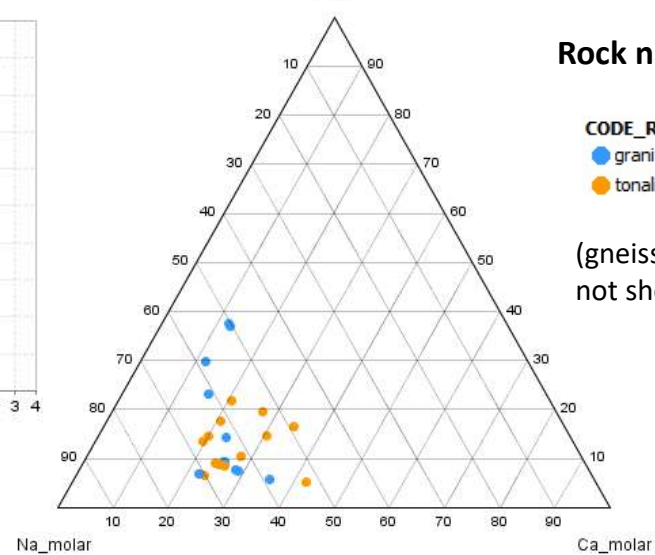

## Rock names (field)

**CODE\_ROCH**

- granite granodiorite
- tonalite

(gneiss – unclassified  
not shown)

## Hébert pluton and other intrusions

### Hébert pluton

|                                                                                   |                                                                                   |                           |
|-----------------------------------------------------------------------------------|-----------------------------------------------------------------------------------|---------------------------|
|   |  | Diorite, tonalite – 17.2% |
|   |  | Tonalite (gneiss) – 82.1% |
|  |                                                                                   | Pegmatite – 0.7%          |

### Wetetnagami pluton

|                                                                                   |                           |
|-----------------------------------------------------------------------------------|---------------------------|
|  | Gabbronorite-gabbro – 82% |
|  | Diorite? Gabbro? – 18%    |

### Mountain pluton

|                                                                                   |                          |
|-----------------------------------------------------------------------------------|--------------------------|
|  | Tonalite Bt-Hnbl – 22.5% |
|  | Granodiorite Bt – 77.5%  |

### Father pluton

|                                                                                   |                          |
|-----------------------------------------------------------------------------------|--------------------------|
|  | Tonalite Hnbl-Bt – 23.4% |
|  | Granodiorite – 76.6%     |

### Espinay pluton

|                                                                                     |                               |
|-------------------------------------------------------------------------------------|-------------------------------|
| 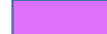 | Pyroxenite – 2.7%             |
|  | Diorite – 3.4%                |
|  | Granodiorite Mag-Hnbl – 93.9% |

### Aigle pluton

|                                                                                     |              |
|-------------------------------------------------------------------------------------|--------------|
|  | Monzodiorite |
|-------------------------------------------------------------------------------------|--------------|

### Saint-Cyr pluton

|                                                                                     |                           |
|-------------------------------------------------------------------------------------|---------------------------|
|  | Tonalite Hnbl-Bt (gneiss) |
|-------------------------------------------------------------------------------------|---------------------------|

### Surprise pluton

|                                                                                     |                         |
|-------------------------------------------------------------------------------------|-------------------------|
| 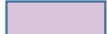 | Tonalite, ±granodiorite |
|-------------------------------------------------------------------------------------|-------------------------|

- ★ Age U-Pb (Hébert pluton): 2695.3 ±1 Ma (David et al. 2009)

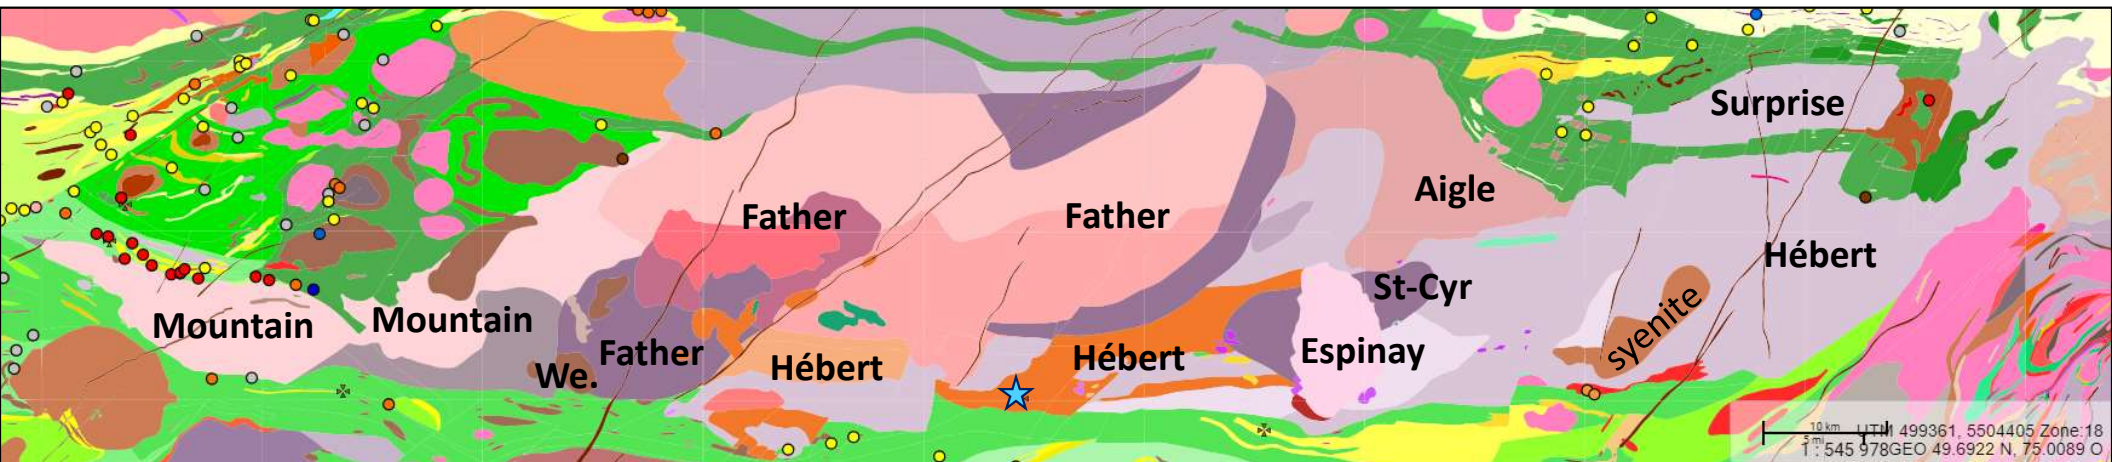



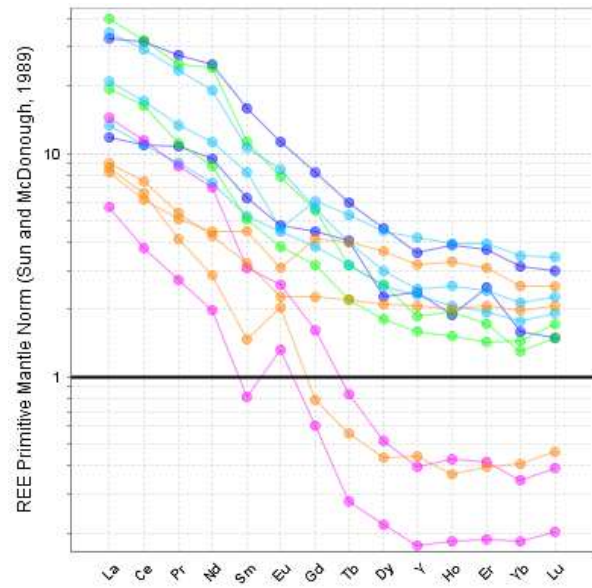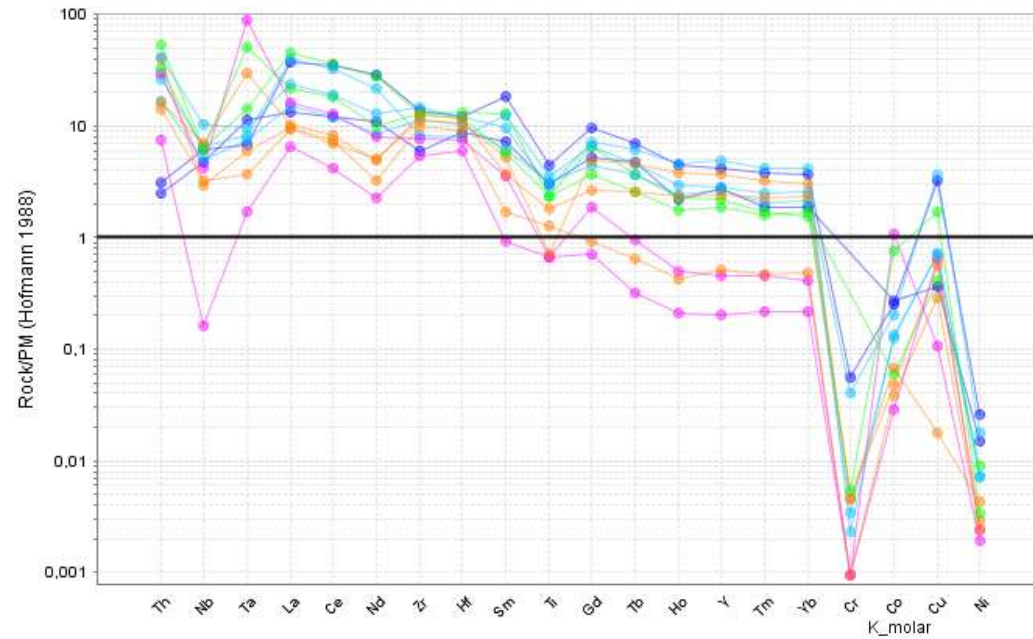

## Hébert pluton

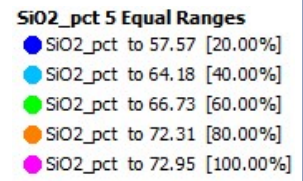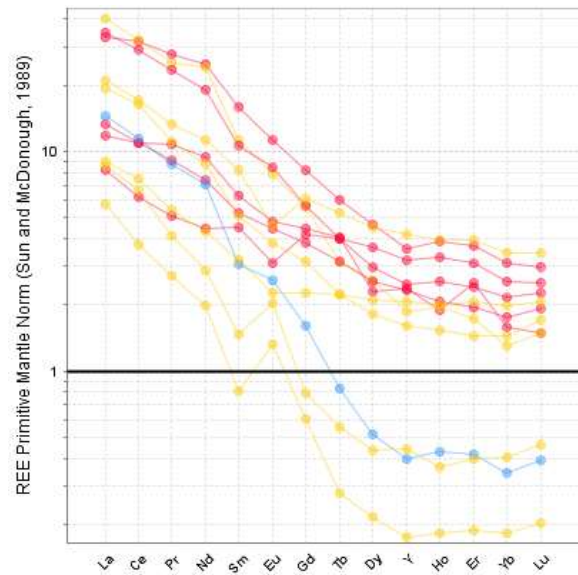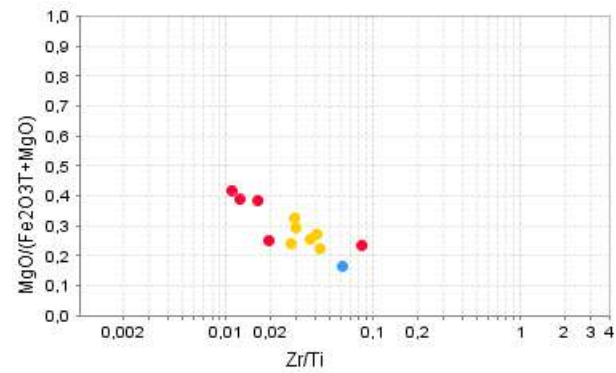

## Rock names (field)

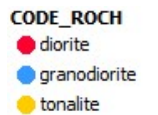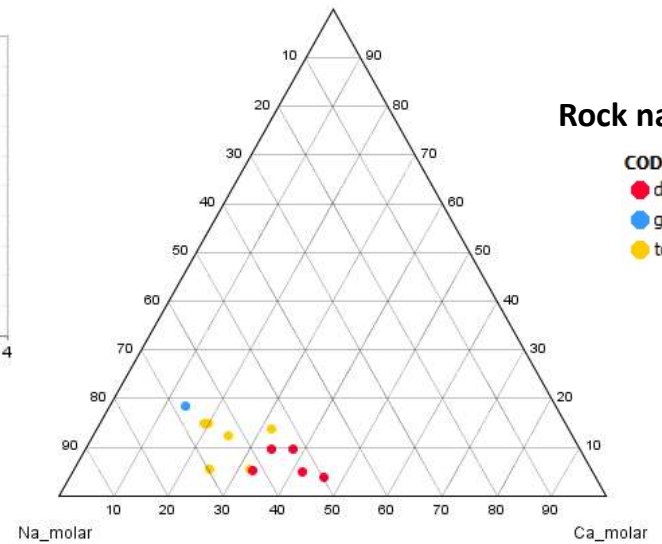



# Pascalis-Tiblemont batholith

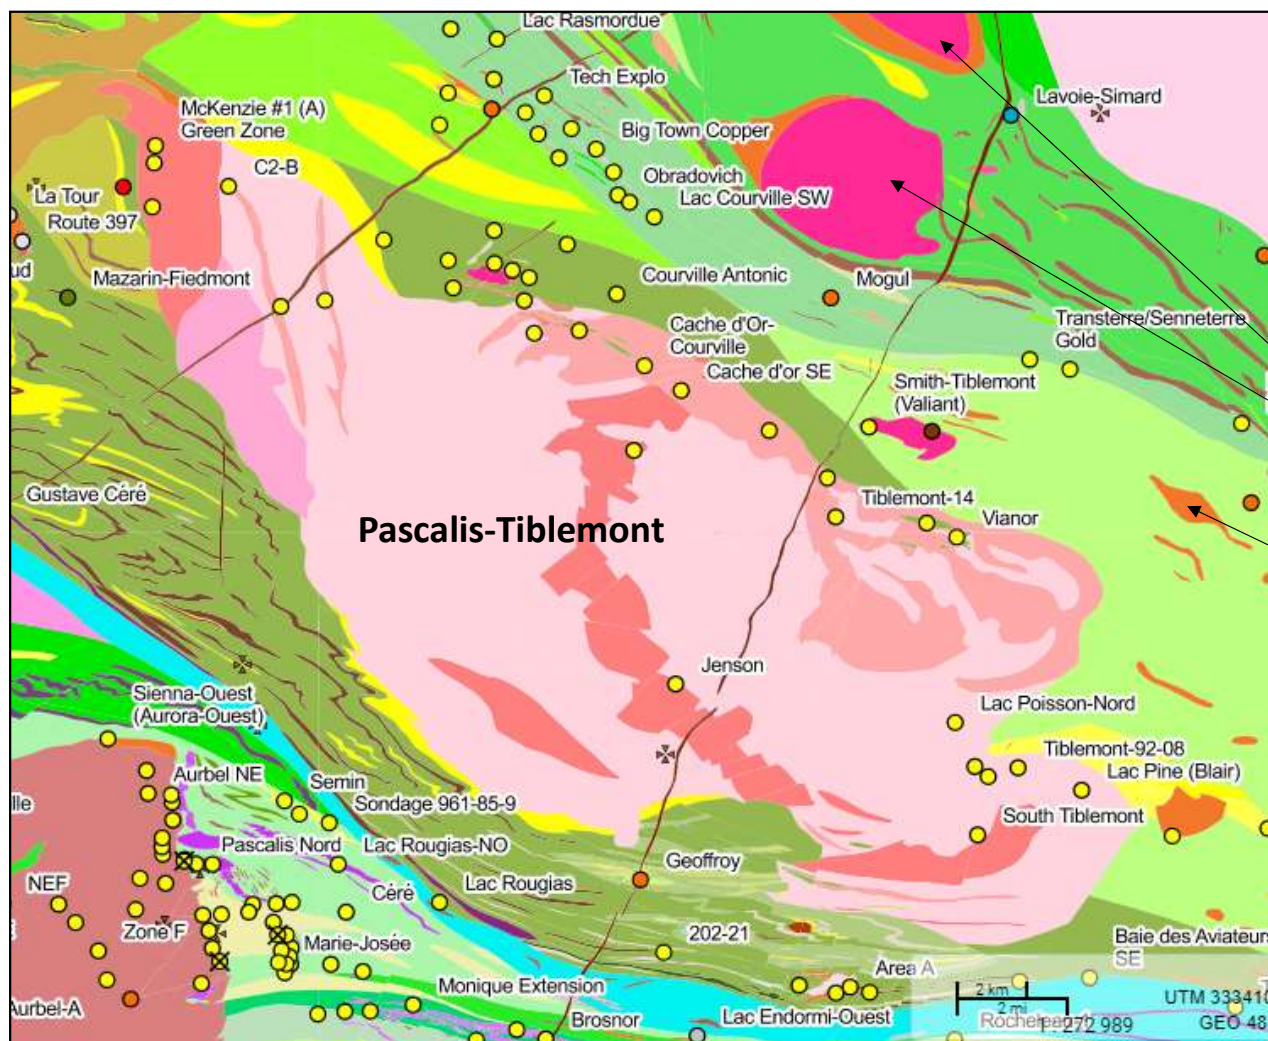

## Pascalis-Tiblemont batholith

- Diorite Qz, tonalite,  $\pm$ granodiorite – 67.1%
- Tonalite, diorite Qz – 4.0%
- Diorite  $\pm$ Qz – 15.0%
- Diorite – 13.7%
- Diorite – 0.2 %

## Unnamed intrusions

- Granodiorite, tonalite
- Diorite
- Diorite

Au showings described as mesothermal Au.

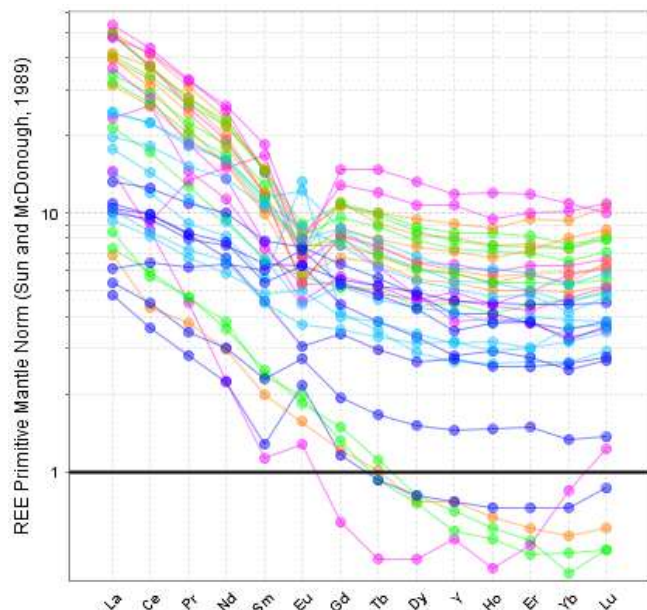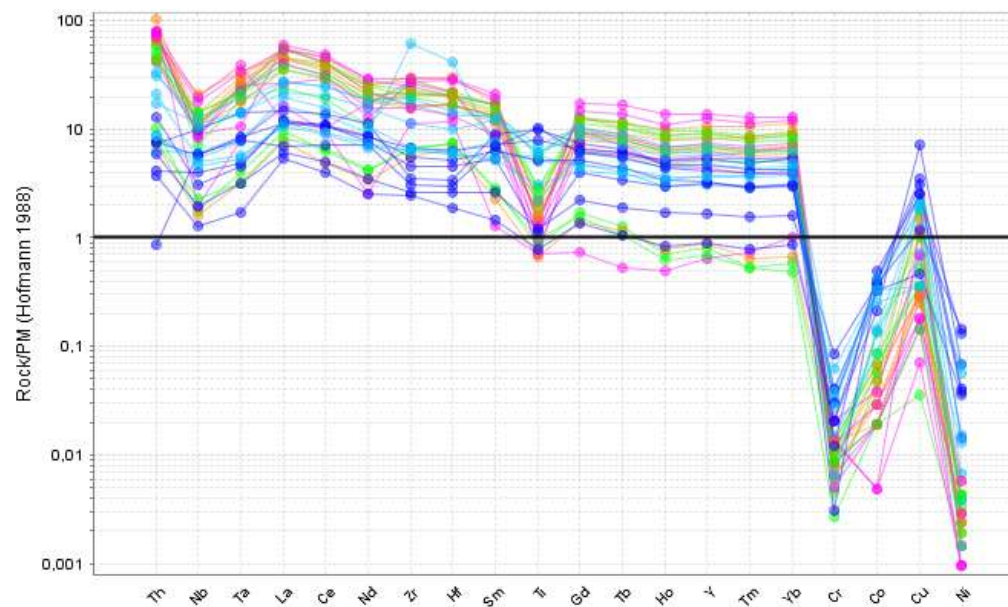

## Pascalis-Tiblemont batholith

**SiO<sub>2</sub>\_pct 5 Equal Ranges**

- SiO<sub>2</sub>\_pct to 50.92 [20.00%]
- SiO<sub>2</sub>\_pct to 65.6 [40.00%]
- SiO<sub>2</sub>\_pct to 70.96 [60.00%]
- SiO<sub>2</sub>\_pct to 74.5 [80.00%]
- SiO<sub>2</sub>\_pct to 84.55 [100.00%]

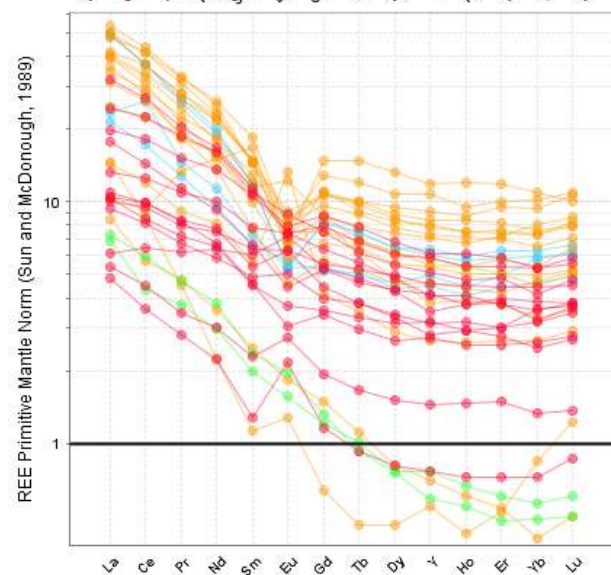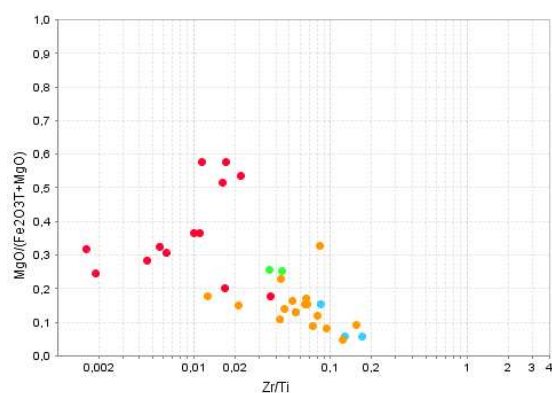

## Rock names (field)

**CODE\_ROCH**

- diorite
- granodiorite
- tonalite
- trondhjemite

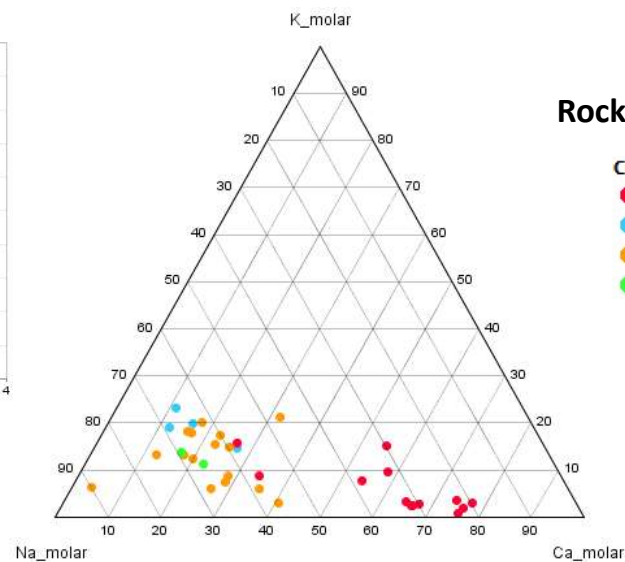



### Waswanipi Riv. pluton

Granodiorite

### Lapparent intrusive suite

Tonalite (gneiss)

### Rachel pluton

Tonalite Bt

### Eau Jaune Complex

Diorite, tonalite – 24%  
Tonalite, diorite – 67.2%  
Trondhjemite – 8.8%

### Houghton pluton

Monzodiorite – 46.3%  
Tonalite – 49.2%  
Diorite, tonalite – 3.6%  
Hornblendite – 0.9%

### Ouest granodiorite

Granodiorite

### Presqu'île pluton

Tonalite, granite

### Anville pluton

Tonalite – 86.6%  
Granodiorite – 13.4%

### Est tonalite

Tonalite Bt – 95.3%  
Granodiorite – 4.7%

Syenite, carbonatite



- Age U-Pb (tonalite):  
★  $2712 \pm 1$  Ma,  $2713.4 \pm 2.5$  Ma (Mortensen 1993)
- Age U-Pb (granodiorite): ★  $2714.8 \pm 0.6$  Ma (Augland et al. 2016)
- Age U-Pb (tonalite): ★  $2700 \pm 2$  Ma (Mortensen 1993)
- Age U-Pb (diorite): ★  $2718.6 \pm 5.5$  Ma (David 2018)



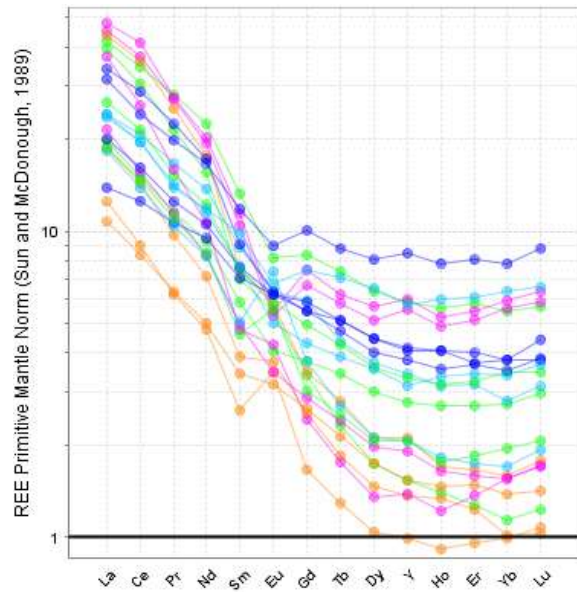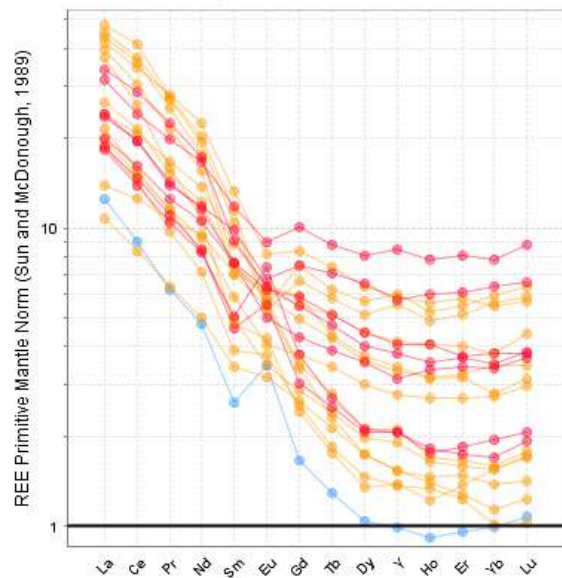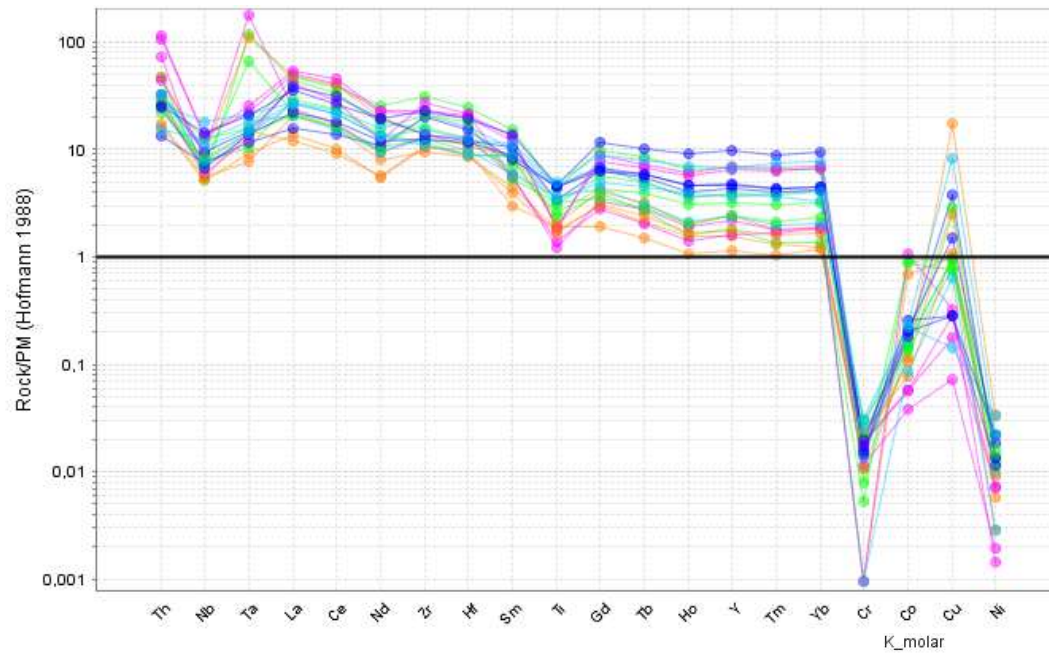

Eau Jaune complex

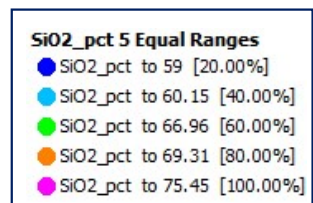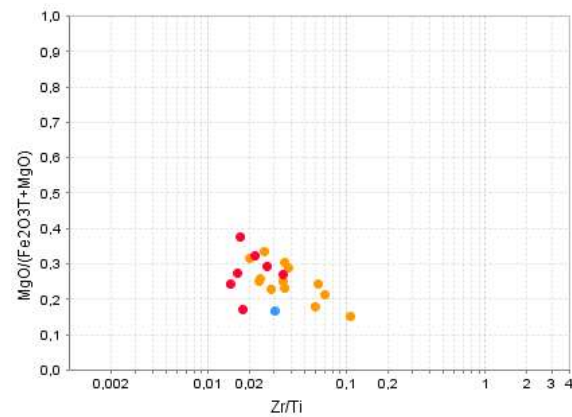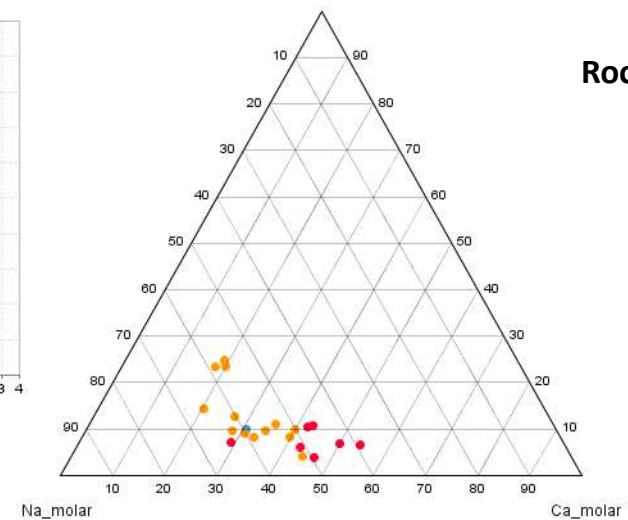

Rock names (field)

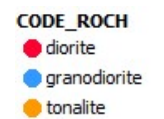

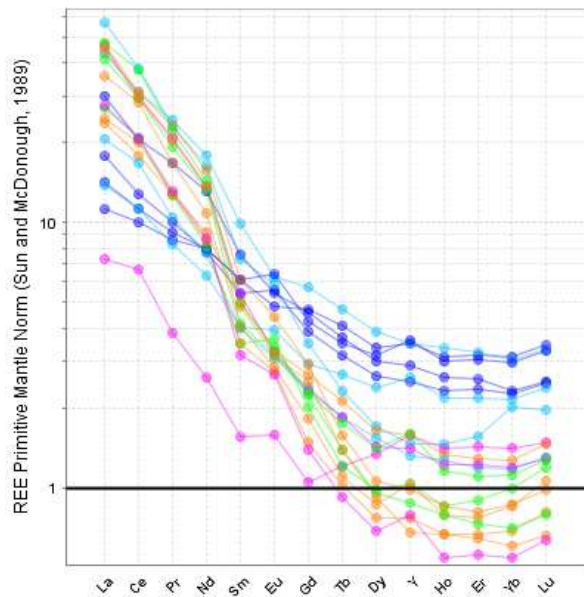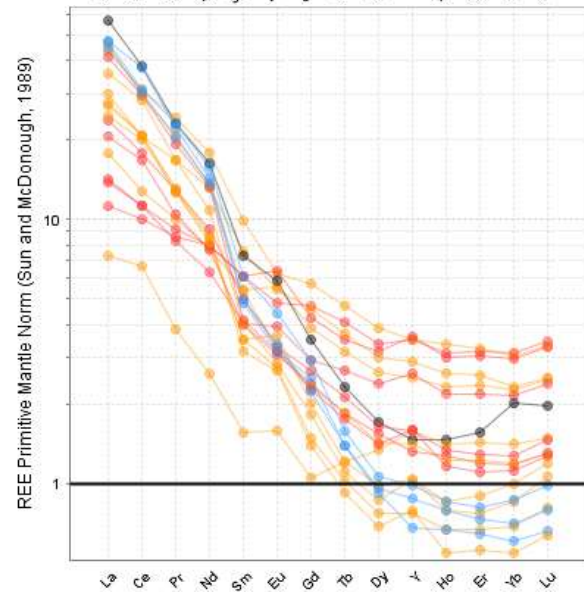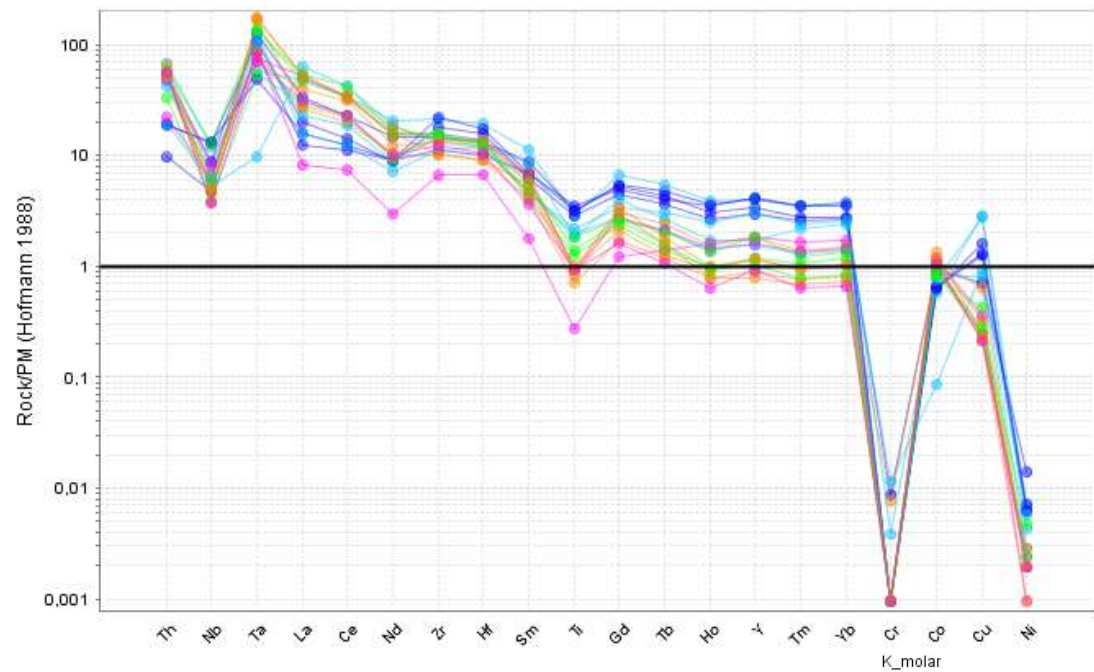

## Anville and Rachel plutons

**SiO<sub>2</sub>\_pct 5 Equal Ranges**

- SiO<sub>2</sub>\_pct to 63.97 [20.00%]
- SiO<sub>2</sub>\_pct to 69.14 [40.00%]
- SiO<sub>2</sub>\_pct to 71.24 [60.00%]
- SiO<sub>2</sub>\_pct to 72.74 [80.00%]
- SiO<sub>2</sub>\_pct to 75.09 [100.00%]

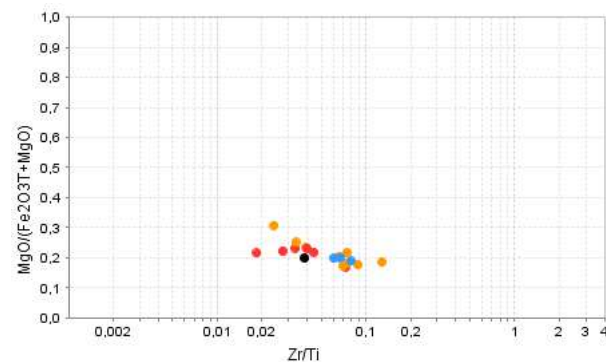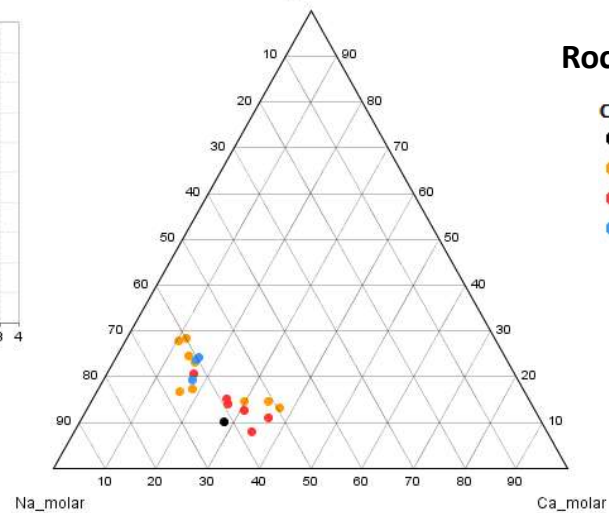

**CODE\_ROCH**

- Anville (diorite)
- Anville (tonalite)
- Rachel (tonalite)
- tonalite (granodiorite)



### Hazeur pluton

 Tonalite

### Muscocho pluton

 Granodiorite Hnbl

### Verneuil pluton

 Tonalite, granodiorite

### La Dauversière pluton

 Tonalite, granodiorite

### Boisvert pluton

 Tonalite, granodiorite

### Némenjiche pluton

 Tonalite

### Unnamed

 Tonalite

### Chico stock

 Tonalite

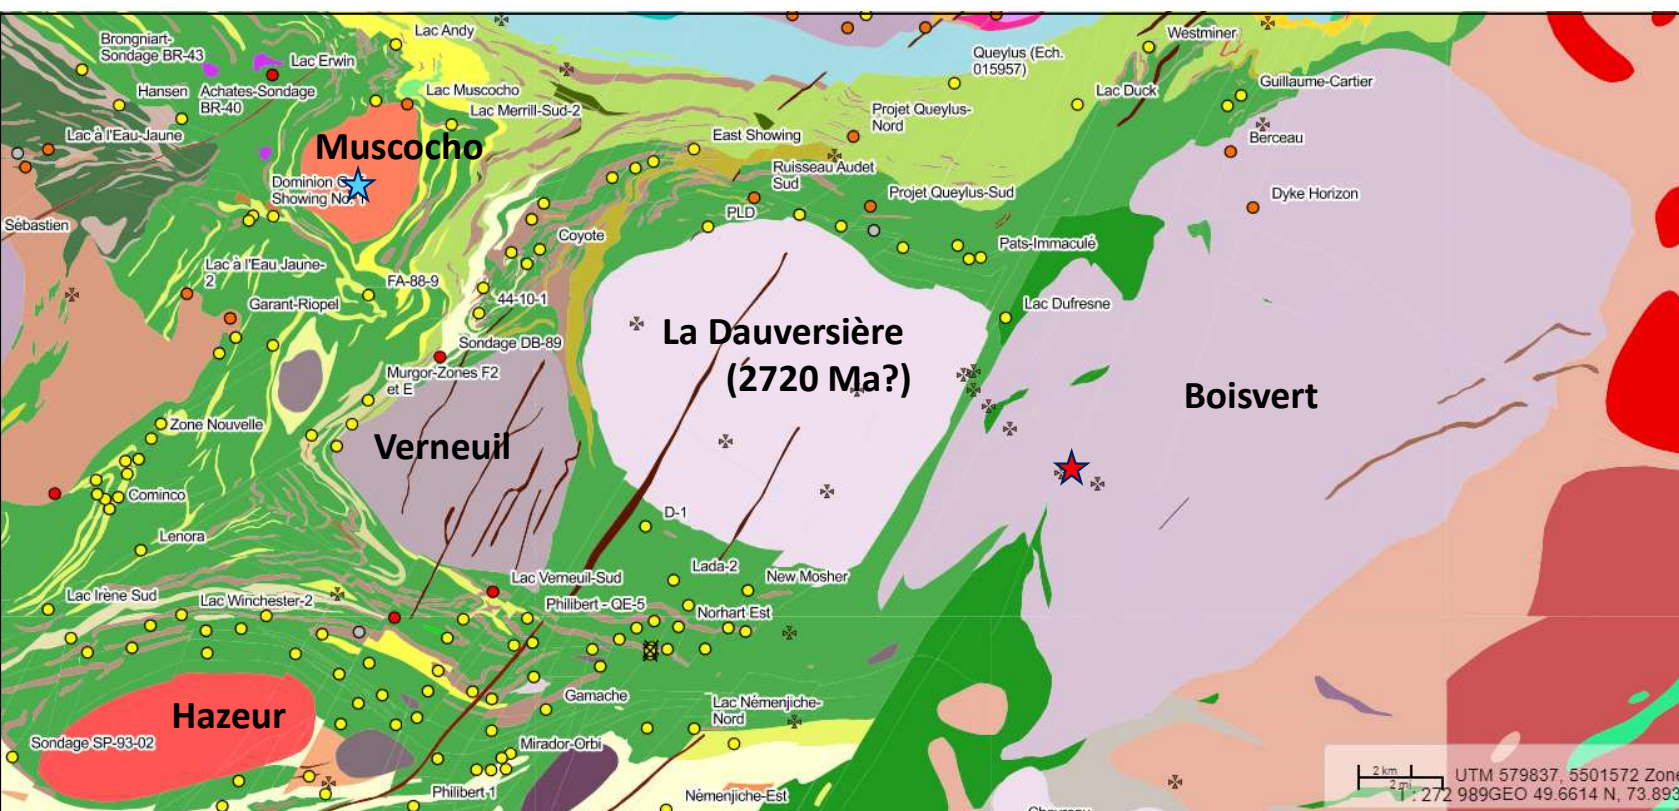

- Age U-Pb (granodiorite):  
**2701  $\pm$  2, -1 Ma**  
(Mortensen 1993)



- Age U-Pb:  
**2697  $\pm$  3 Ma**  
(Davis et al. 2005)



# La Dauversière pluton

**SiO<sub>2</sub>\_pct 5 Equal Ranges**

- SiO<sub>2</sub>\_pct to 65.13 [20.00%]
- SiO<sub>2</sub>\_pct to 68.24 [40.00%]
- SiO<sub>2</sub>\_pct to 68.8 [60.00%]
- SiO<sub>2</sub>\_pct to 70.6 [80.00%]
- SiO<sub>2</sub>\_pct to 74.8 [100.00%]

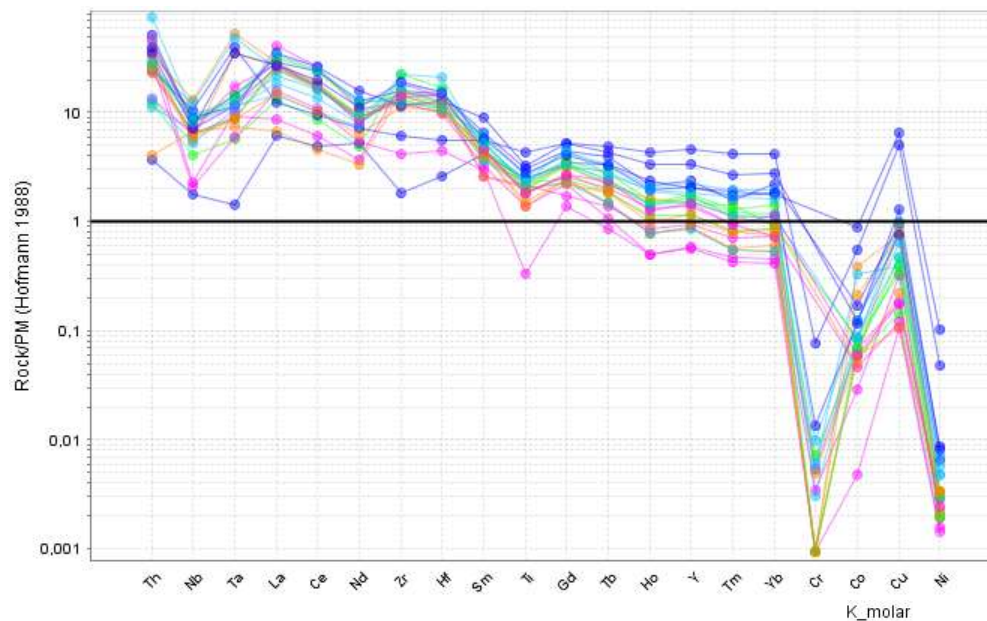

## Rock names (field)

**CODE\_ROCH**

- diorite
- granodiorite
- tonalite

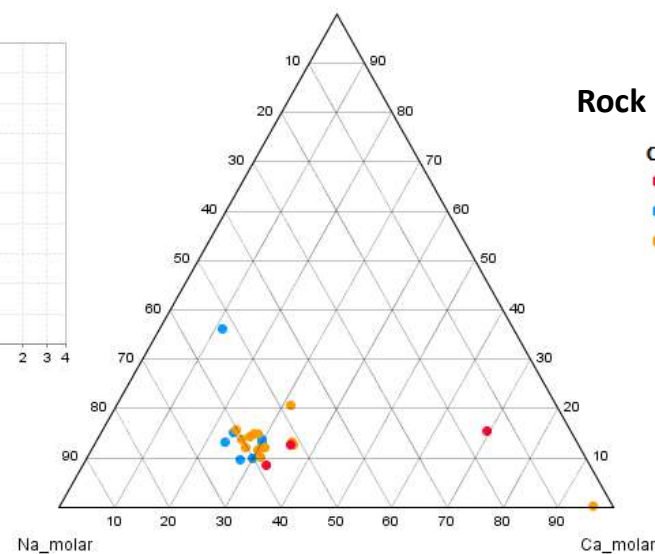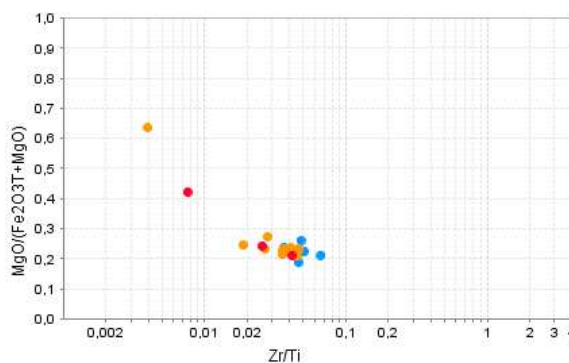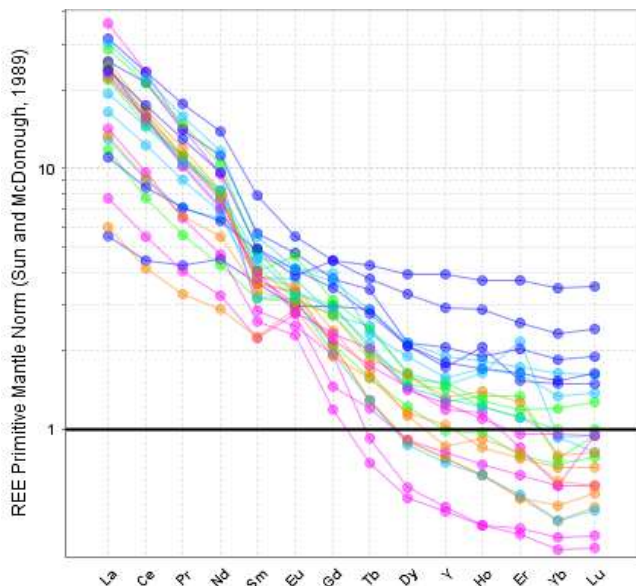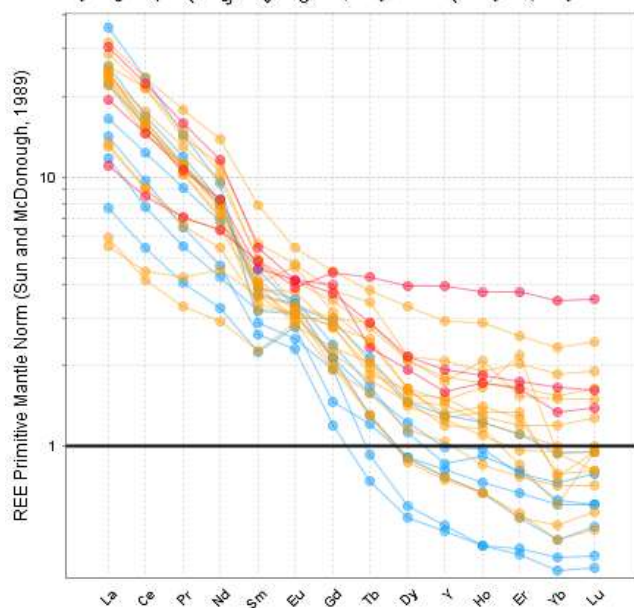

# Chibougamau pluton

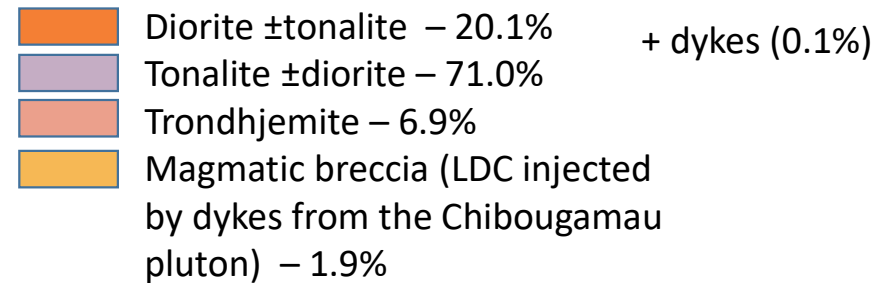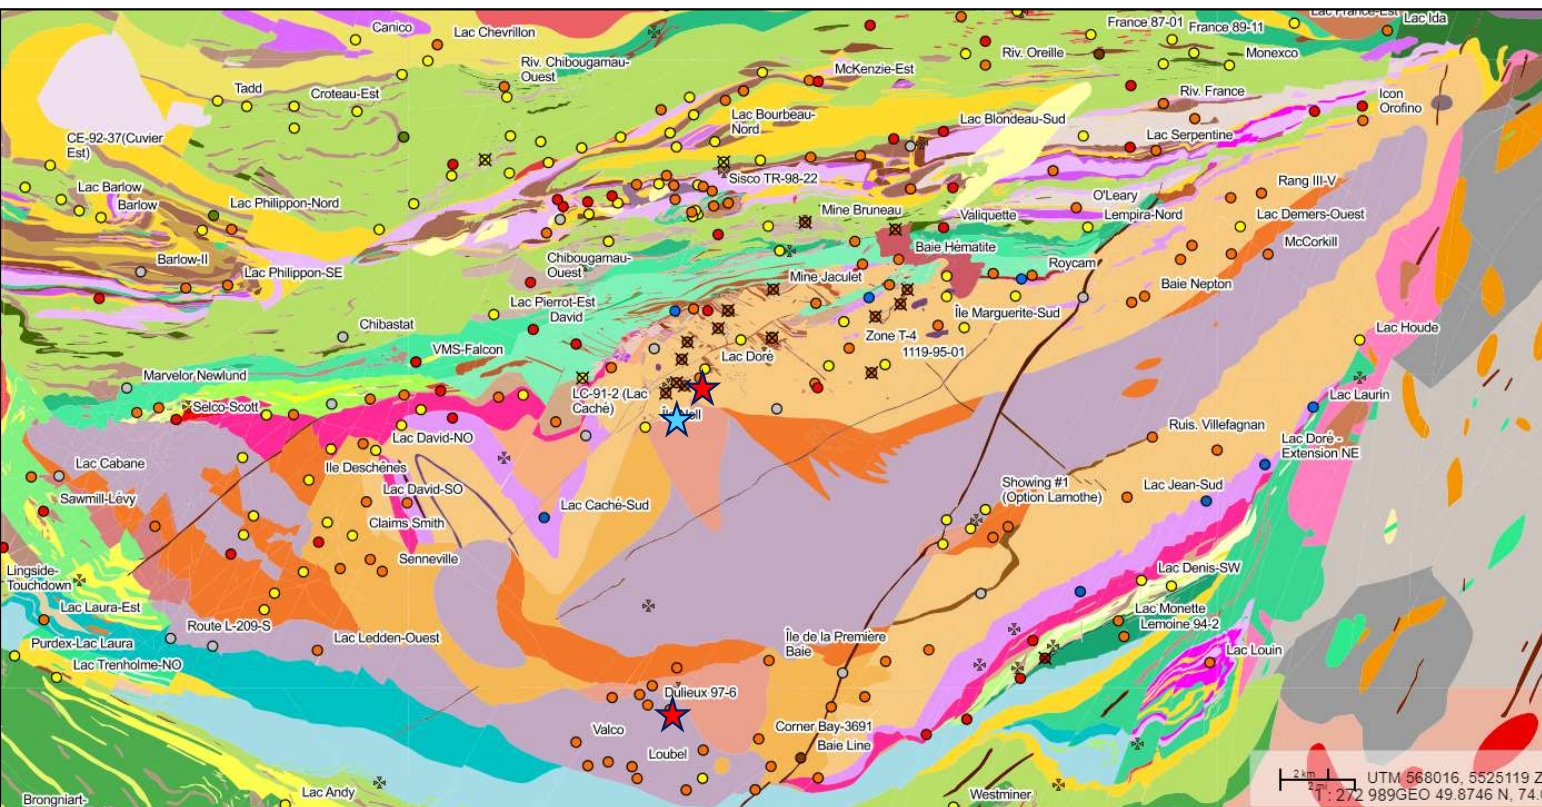

- ★ • Age U-Pb (tonalite): **2718 ± 2 Ma** (Krogh and Davis 1971)
- ★ • Age U-Pb: **2705-2701 Ma** (David et al. 2010; McNicoll et al. 2008)

Several Cu-Au porphyry-style deposits and showings



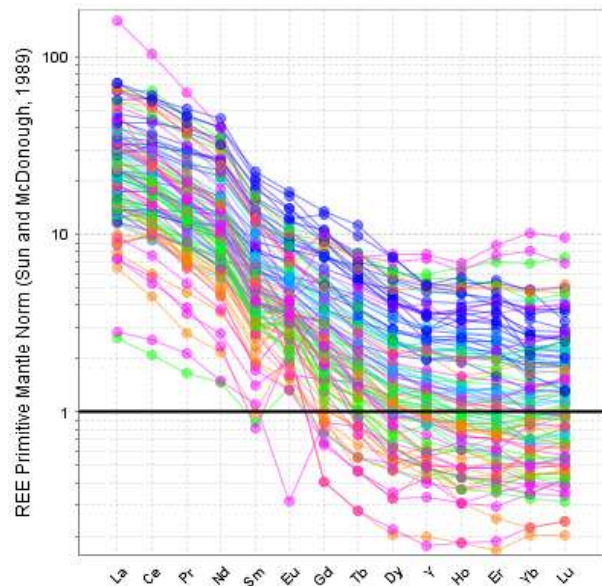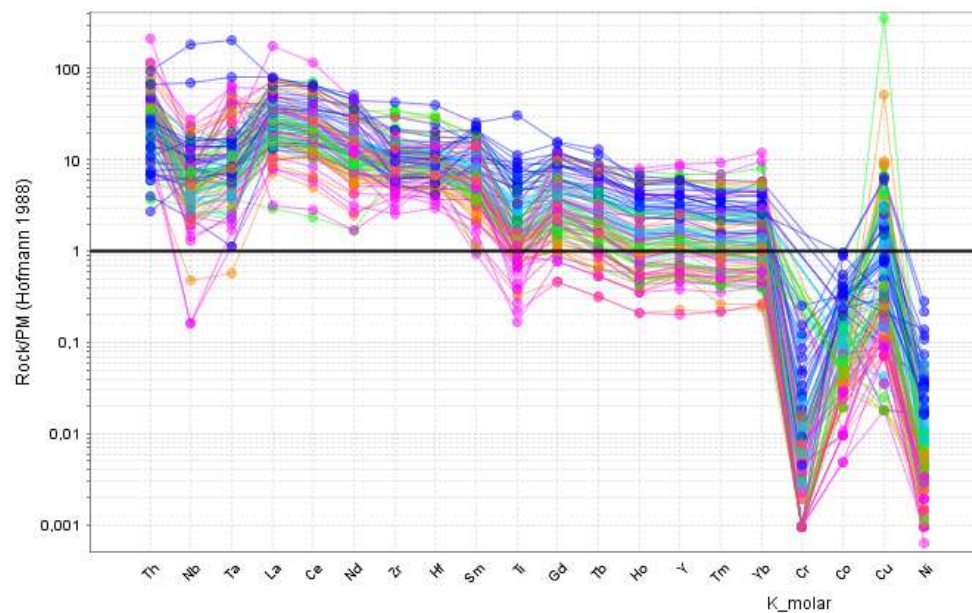

## Chibougamau pluton

### SiO<sub>2</sub>\_pct 5 Equal Ranges

- SiO<sub>2</sub>\_pct to 56.43 [20.00%]
- SiO<sub>2</sub>\_pct to 66.98 [40.00%]
- SiO<sub>2</sub>\_pct to 69.31 [60.00%]
- SiO<sub>2</sub>\_pct to 71.1 [80.00%]
- SiO<sub>2</sub>\_pct to 76.59 [100.00%]

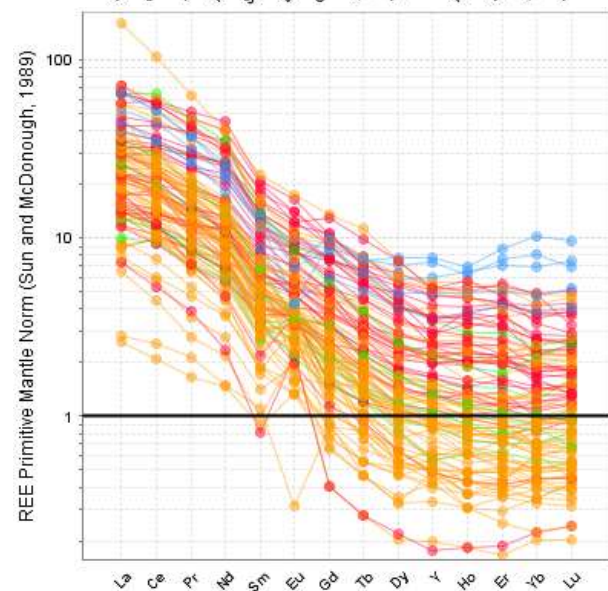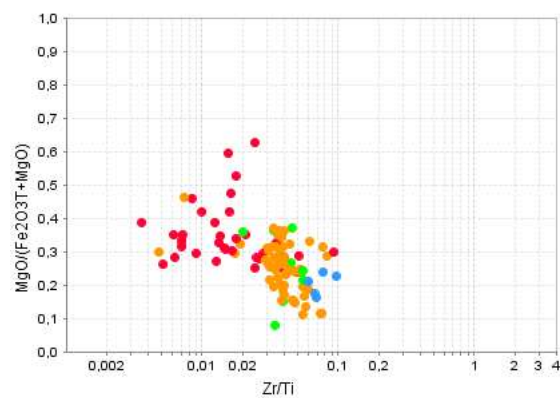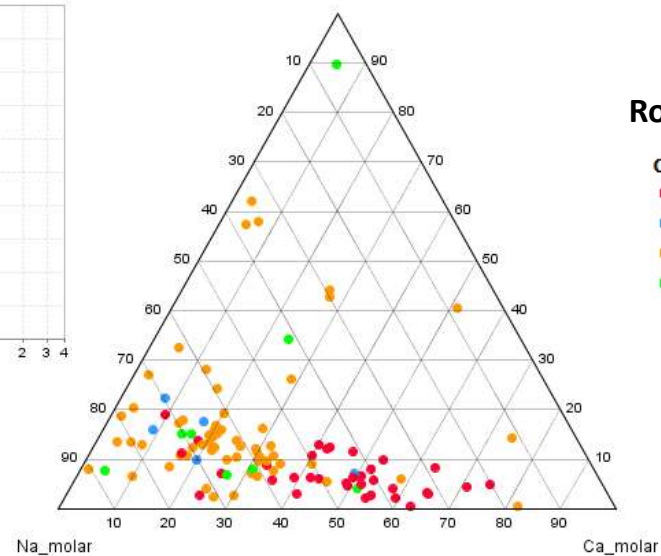

## Rock names (field)

### CODE\_ROCH

- diorite
- granite, granodiorite
- tonalite
- trondhjemite



# Mistaouac pluton

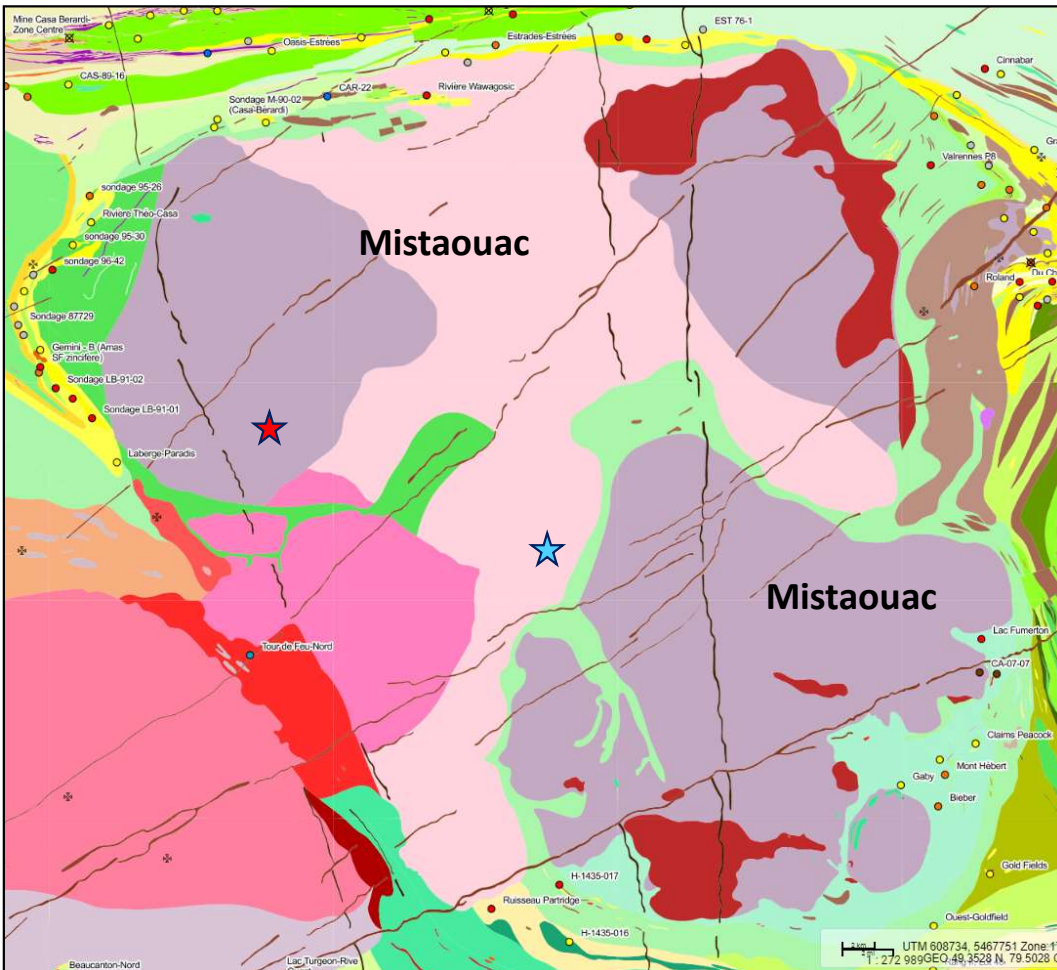

- Tonalite Bt ±Hnbl – 51.0% (aerial surface)
- Granite Bt – 8.4%
- Granodiorite and granite Hnbl-Bt – 33.3%
- Diorite ±Qz, Hnbl – 7.3%

- ★ Age U-Pb (granodiorite-tonalite): **2727 ±9 Ma**;  
★ **2724 ±4 Ma** (*Davis et al. 1993*)
- ★ Age U-Pb (tonalite): **2726 ±2 Ma** (*Davis et al. 2000*)

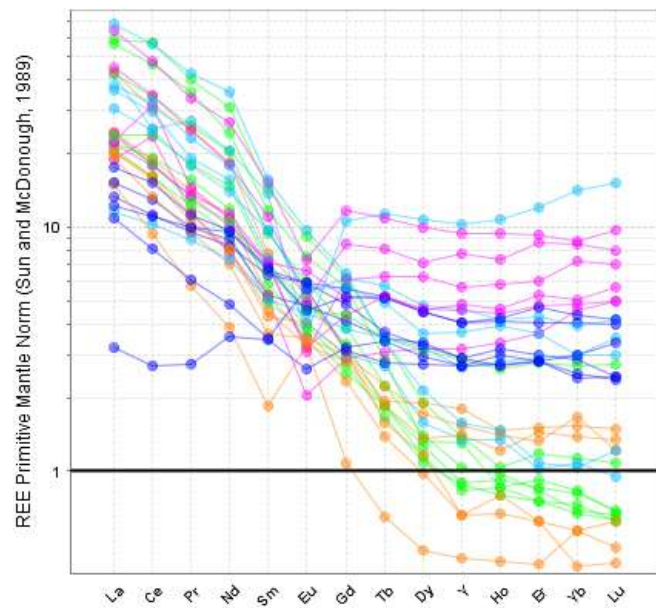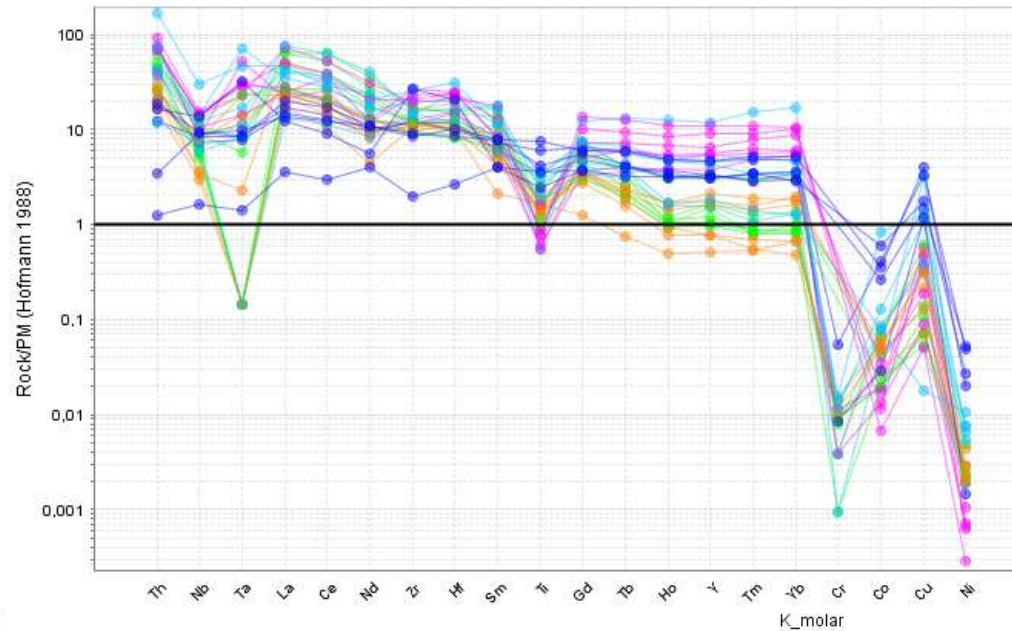

## Mistaouac pluton

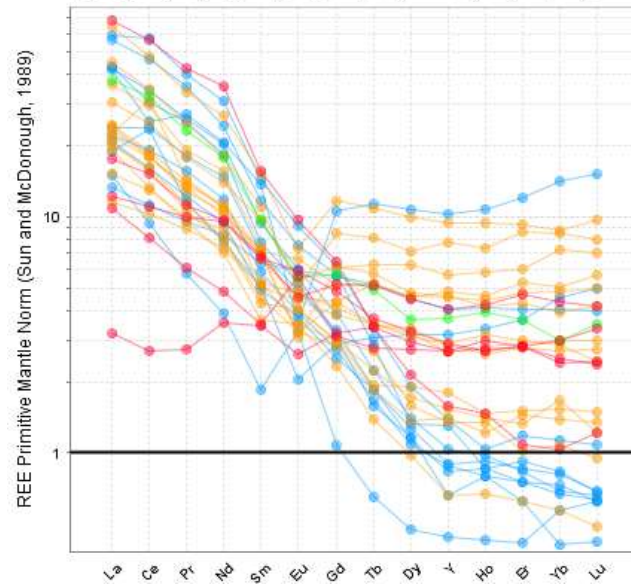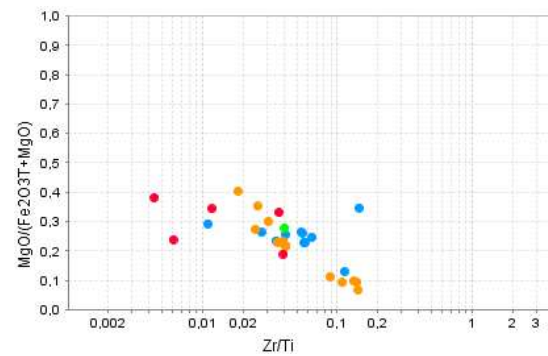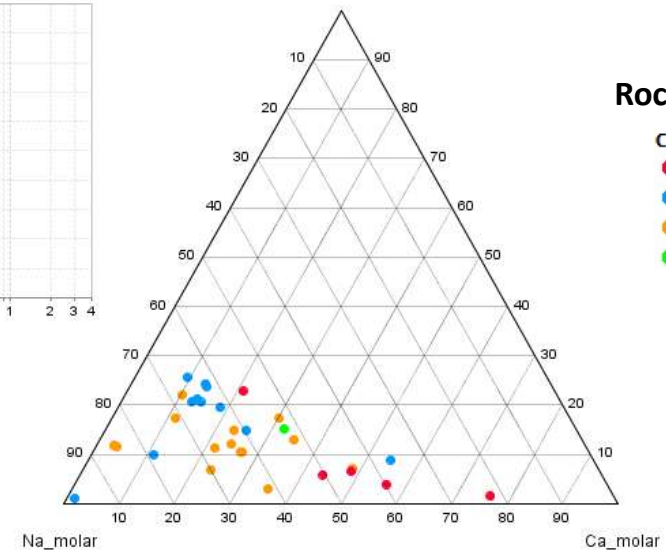



## Intermediate and felsic intrusions characterized by $(\text{La}/\text{Yb})_N < 6$

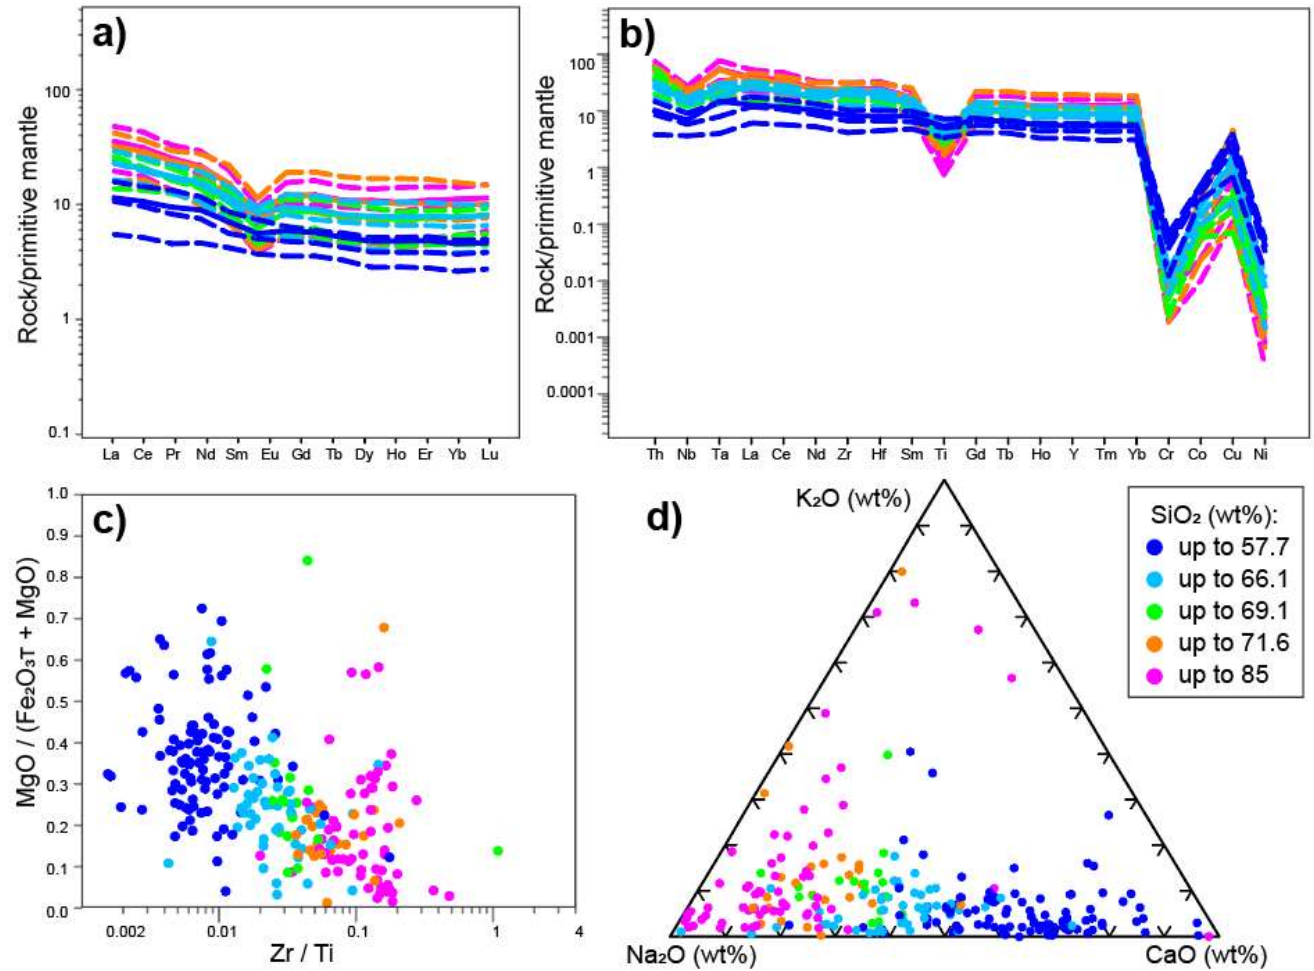

**Figure 6** (see manuscript for details)

## Dufault and Powell plutons

## Default pluton

 Granodiorite – 100%

## Powell pluton

 Tonalite – 63.5%

 Diorite – 36.5% **Powell pluton?**

- ★ Age U-Pb (granodiorite):  $2690 \pm 2$  Ma,  $2698 \pm 2$  Ma (*Mortensen 1993*)
- ★ Age U-Pb (tonalite):  $2720 +3, -1$  Ma (*Mortensen 1993*)
- ★ Age U-Pb (tonalite):  $2700 \pm 1$  Ma (*McNicoll et al. 2011*)

|           |                                                                                                |
|-----------|------------------------------------------------------------------------------------------------|
| <b>Au</b> | Mesothermal Au deposit in the Powell pluton                                                    |
| <b>Cu</b> | Cu-Mo-Au-Ag magmatic-hydrothermal ('porphyry-style') deposit associated with the Powell pluton |

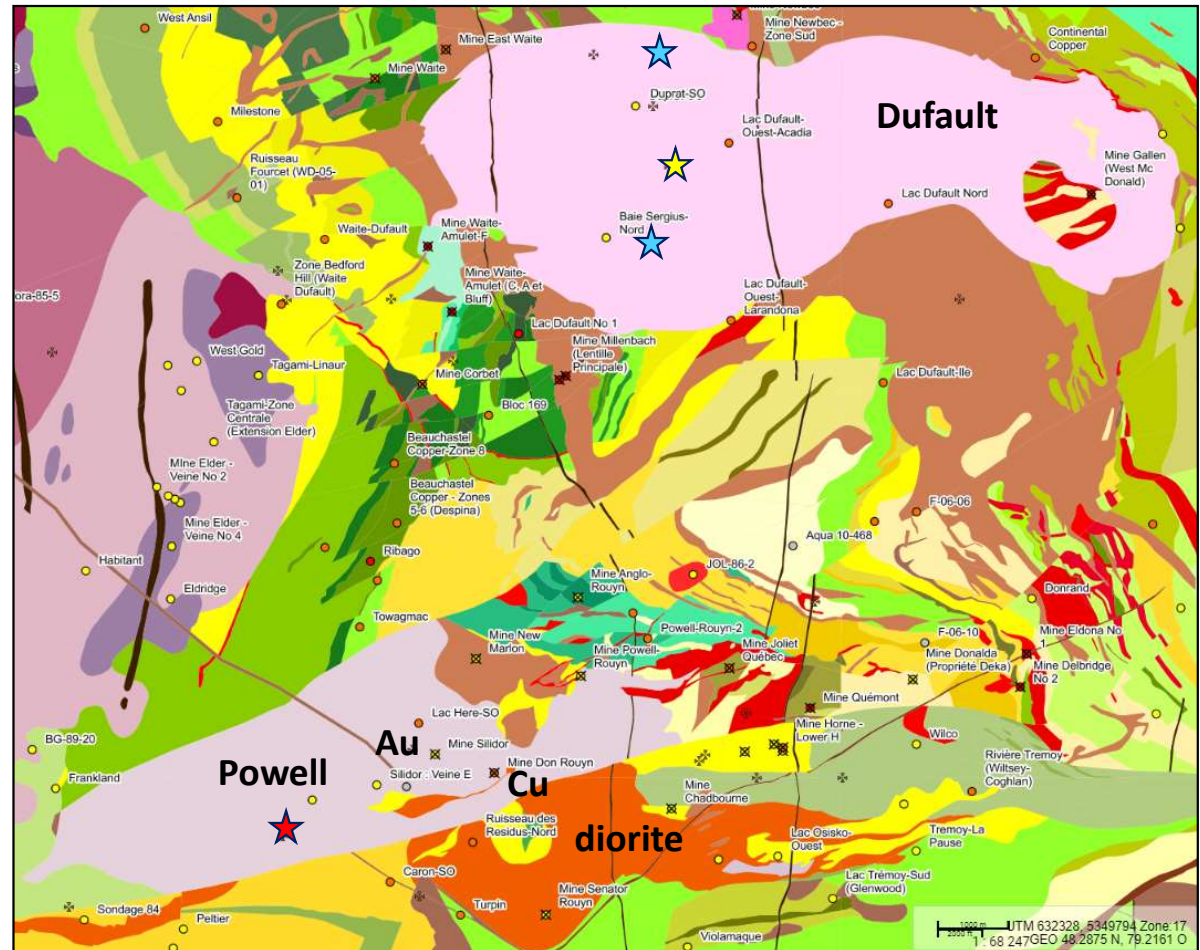



## Flavrian pluton

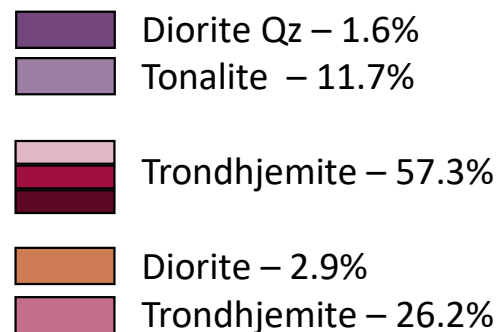

- Age U-Pb (trondhjemite): **2700.7 ±0.6 Ma** (McNicoll *et al.* 2014) 
- Age U-Pb (trondhjemite): **2701 +3,-1 Ma** (Mortensen 1993) 

Au showings and deposits in the Flavrian pluton mostly described as mesothermal Au.

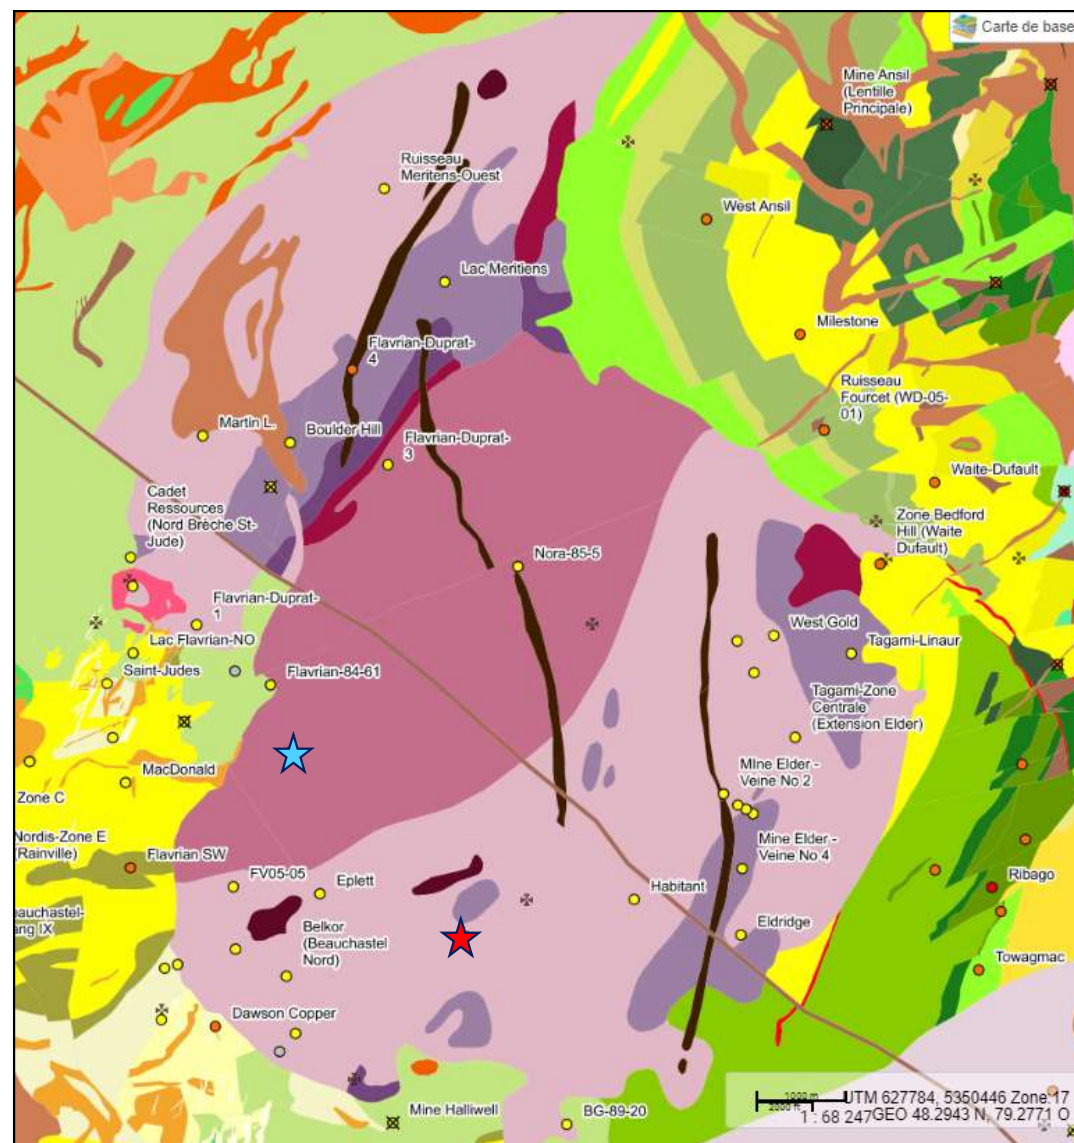

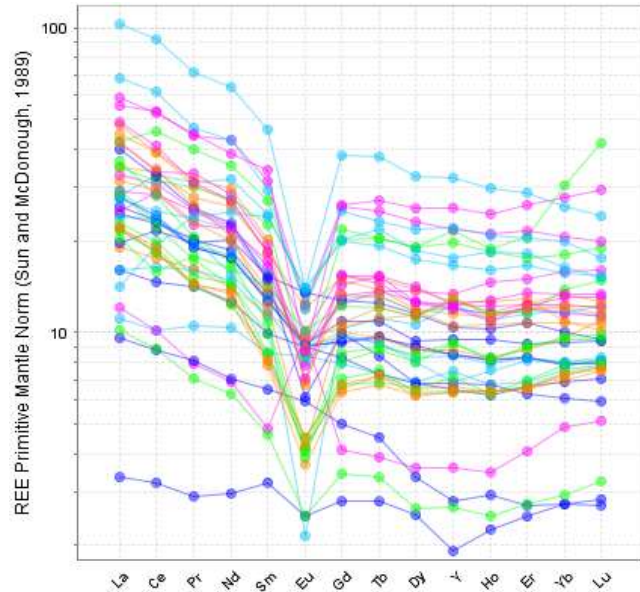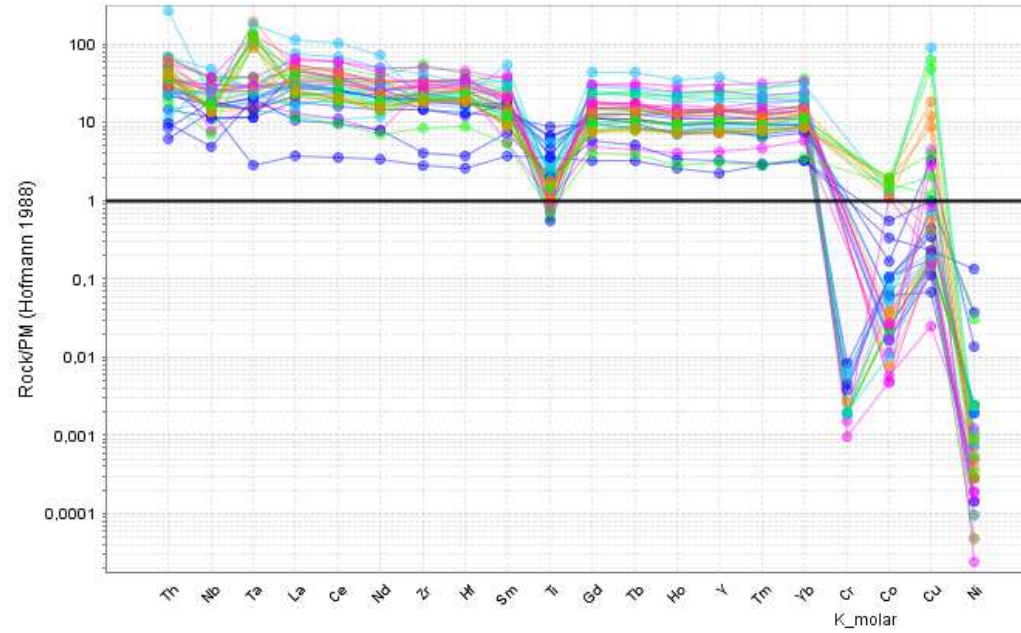

## Powell and Flavrian plutons

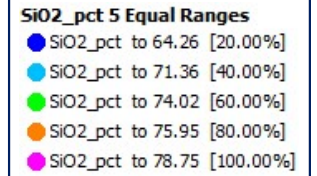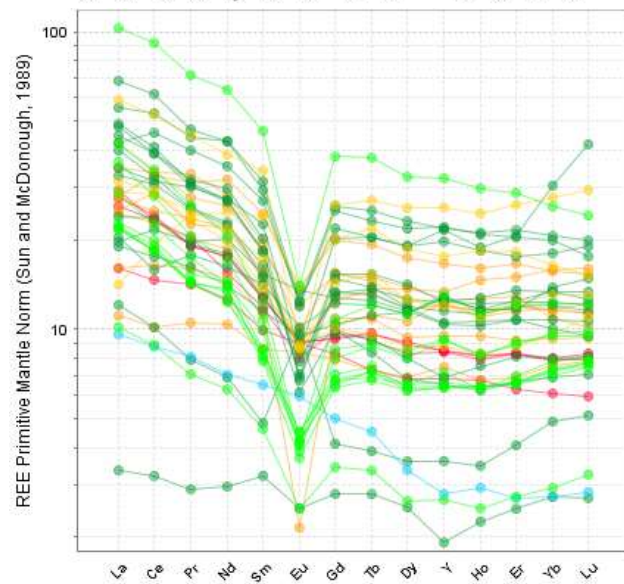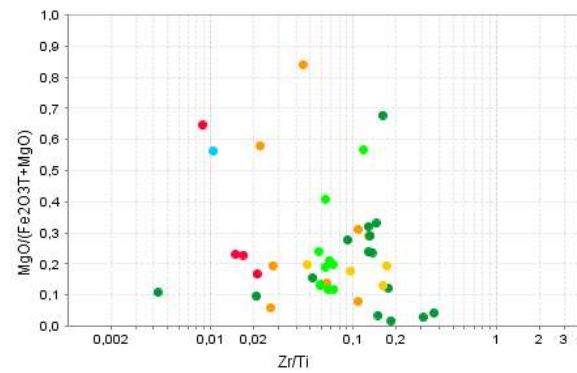

## Rock names (field)

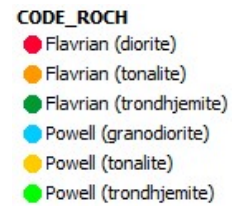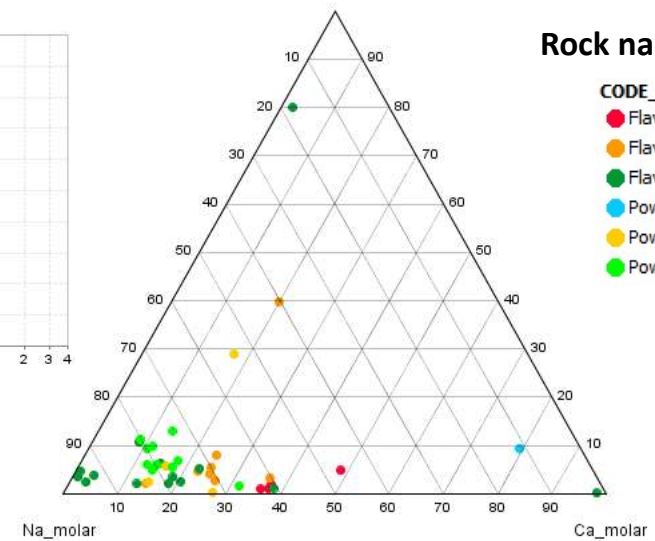



## Bourlamaque pluton

- Diorite and tonalite – 99.5%
- Diorite (Bourlamaque?) – 0.5%

- Age U-Pb (diorite):  
★  $2704.7 \pm 0.8 \text{ Ma}$  (David 2019)
- Age U-Pb (altered ultramafic? rock):  
★  $2710 \pm 5, -4 \text{ Ma}$  (Taner and Trudel 1989)
- Age U-Pb (altered granodiorite):  $2711 \pm 12 \text{ Ma}$  (Claoué-long et al. 1990)

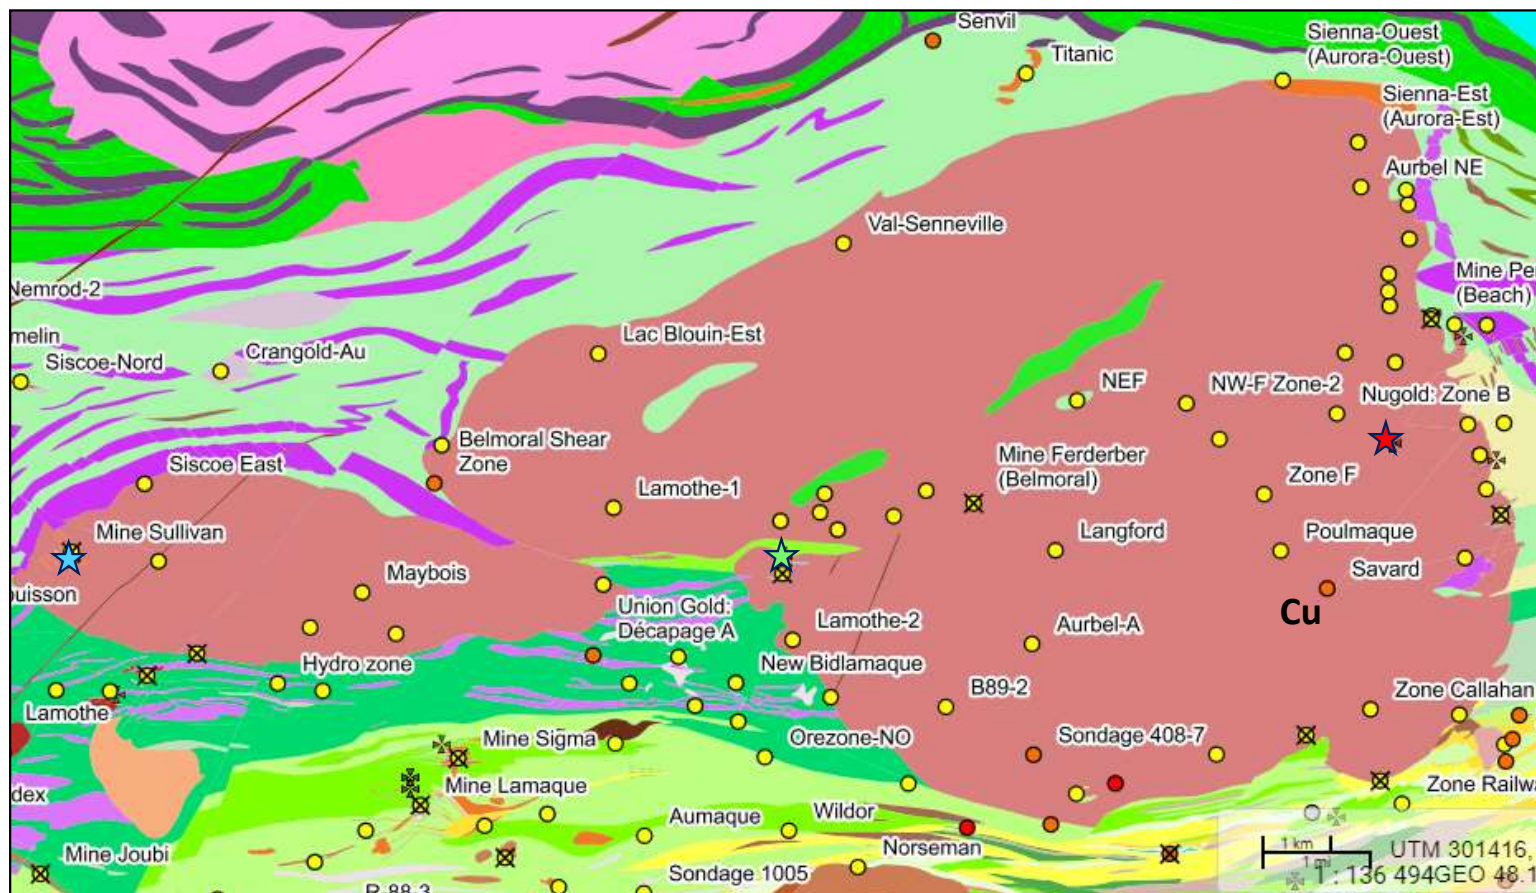

Au showings described as mesothermal Au.

**Cu** Cu showing associated with a porphyry dyke

### Waswanipi Riv. pluton

Granodiorite

### Lapparent intrusive suite

Tonalite (gneiss)

### Rachel pluton

Tonalite Bt

### Eau Jaune Complex

Diorite, tonalite – 24%  
Tonalite, diorite – 67.2%  
Trondhjemite – 8.8%

### Houghton pluton

Monzodiorite – 46.3%  
Tonalite – 49.2%  
Diorite, tonalite – 3.6%  
Hornblendite – 0.9%

### Ouest granodiorite

Granodiorite

### Presqu'île pluton

Tonalite, granite

### Anville pluton

Tonalite – 86.6%  
Granodiorite – 13.4%

### Est tonalite

Tonalite Bt – 95.3%  
Granodiorite – 4.7%

Syenite, carbonatite

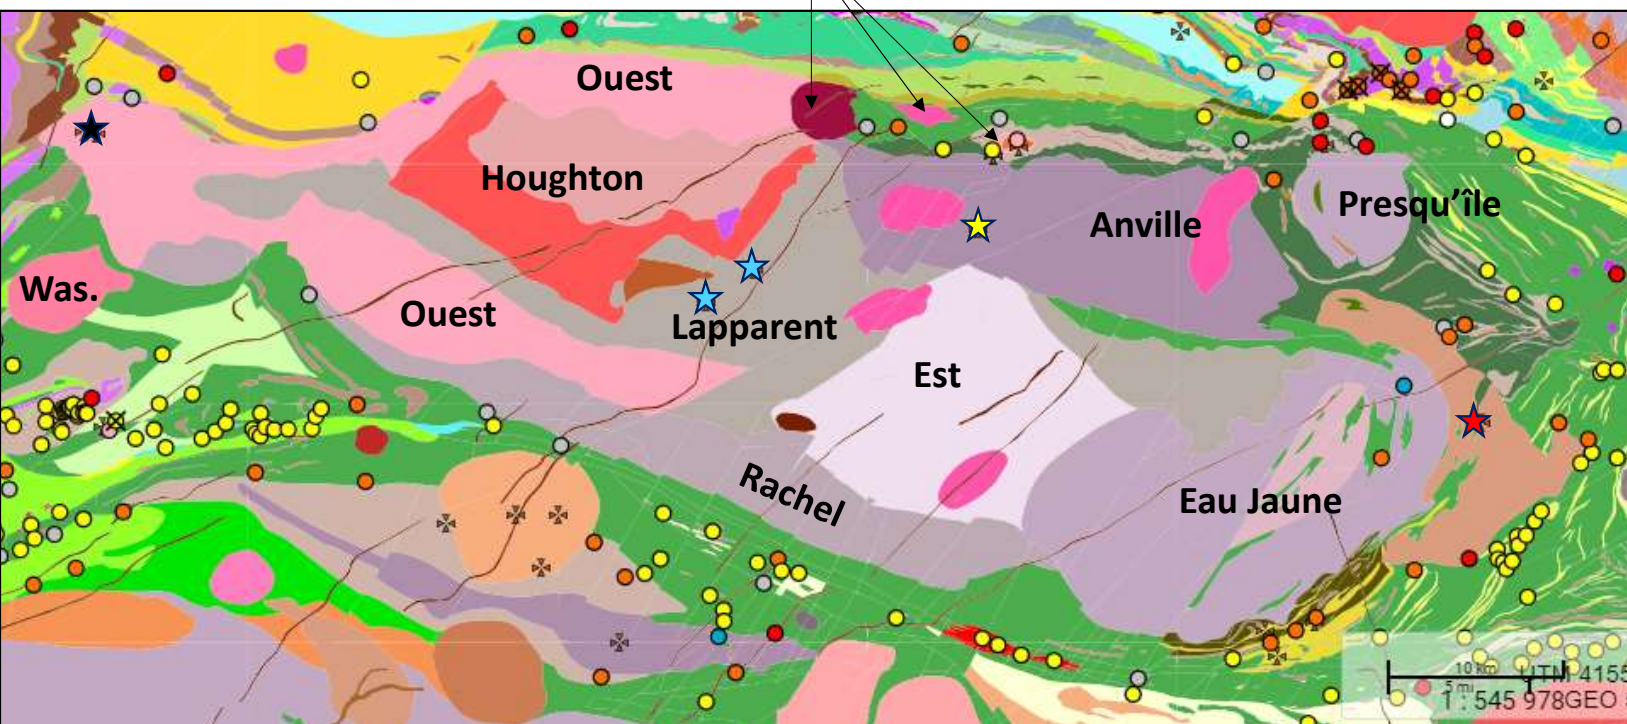

- Age U-Pb (tonalite):  
★  $2712 \pm 1$  Ma,  $2713.4 \pm 2.5$  Ma (Mortensen 1993)
- Age U-Pb (granodiorite): ★  $2714.8 \pm 0.6$  Ma (Augland et al. 2016)
- Age U-Pb (tonalite): ★  $2700 \pm 2$  Ma (Mortensen 1993)
- Age U-Pb (diorite): ★  $2718.6 \pm 5.5$  Ma (David 2018)



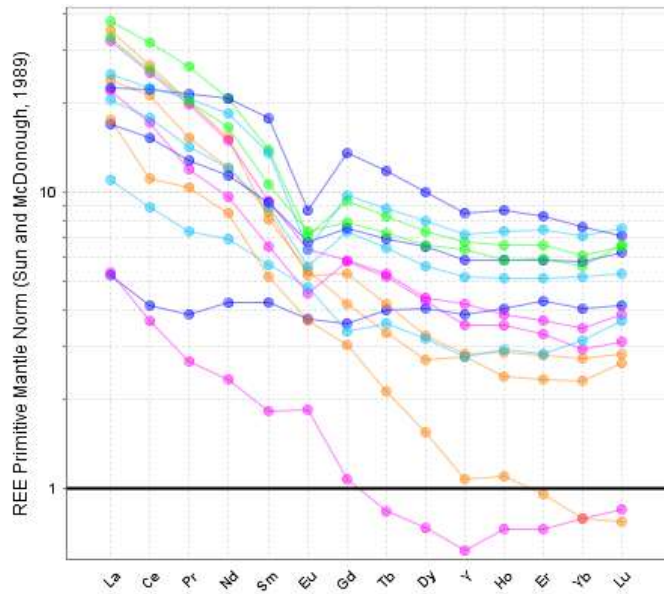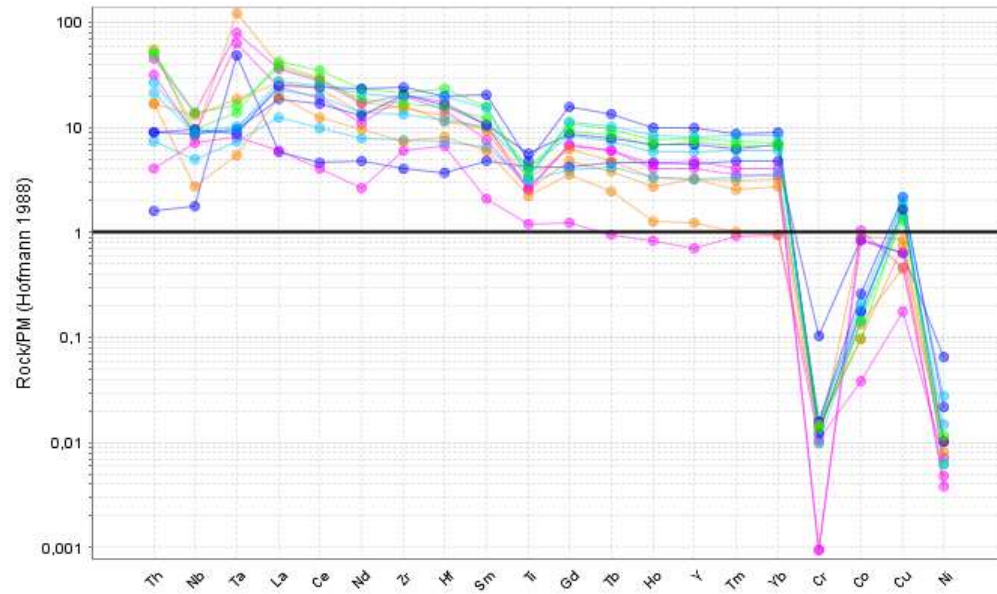

## Bourlamaque pluton and Lapparent intrusive suite

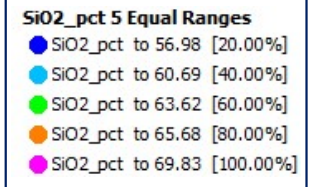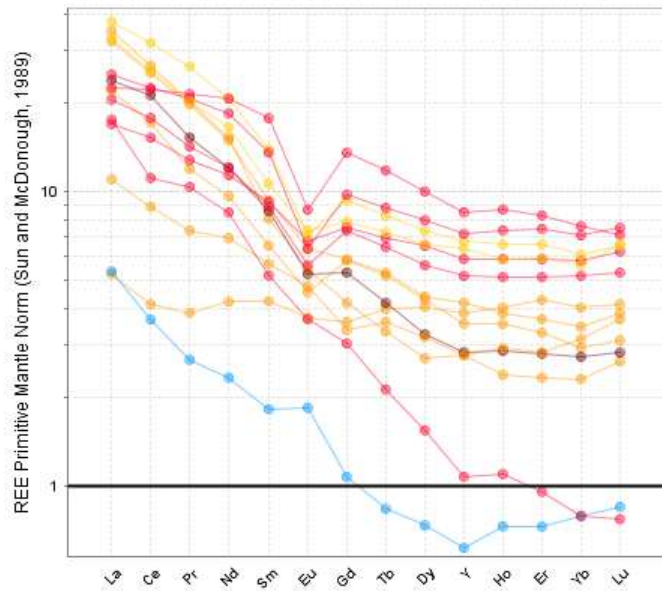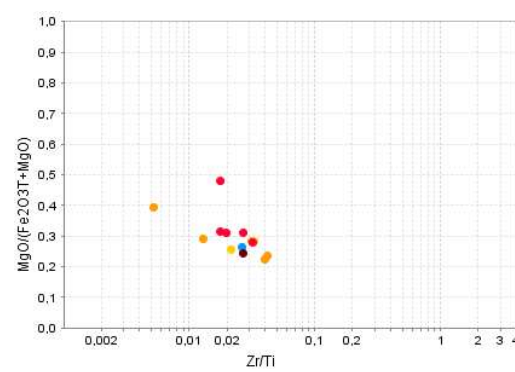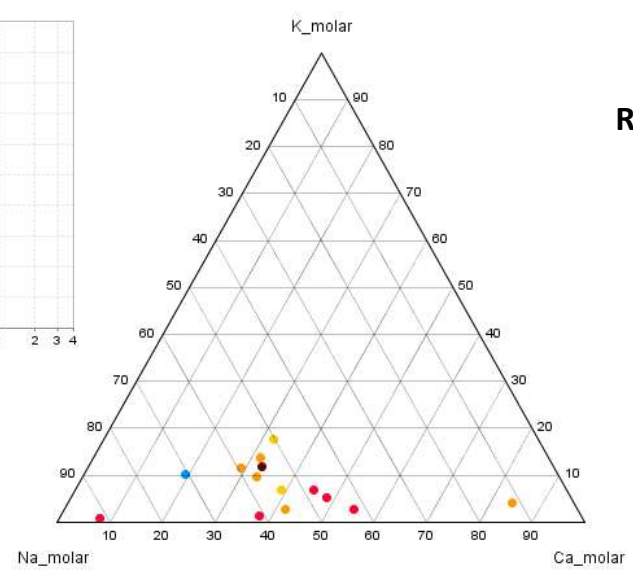

## Rock names (field)

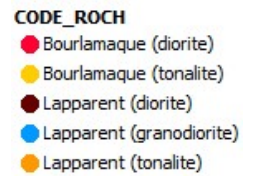

## Sodagranophyre of Lac Doré Complex (LDC)

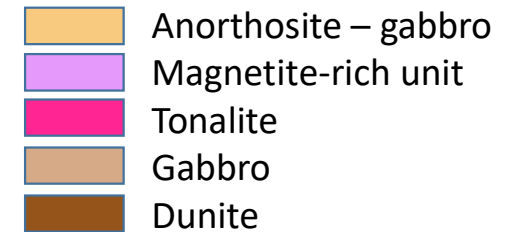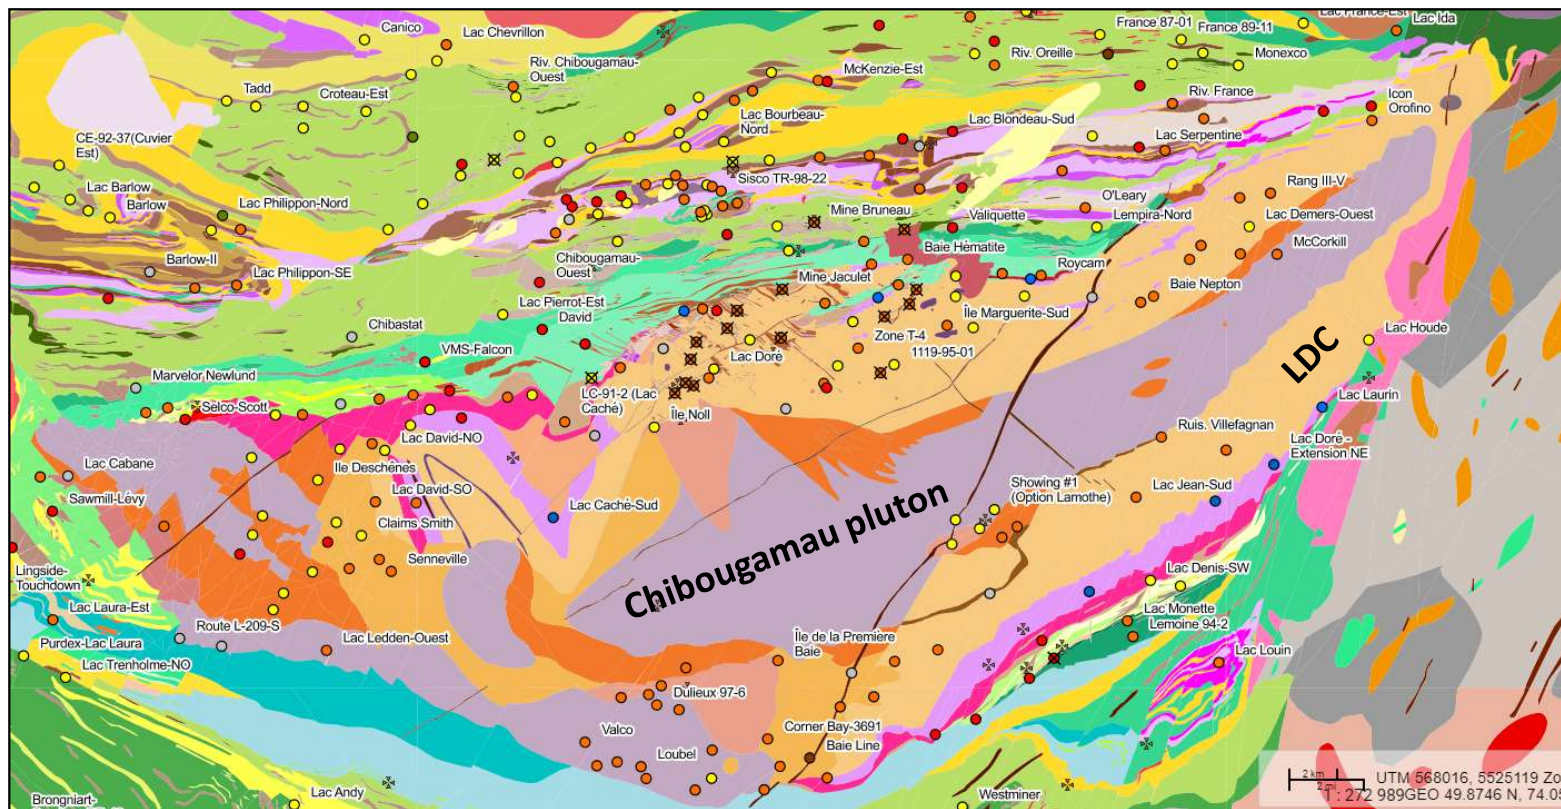



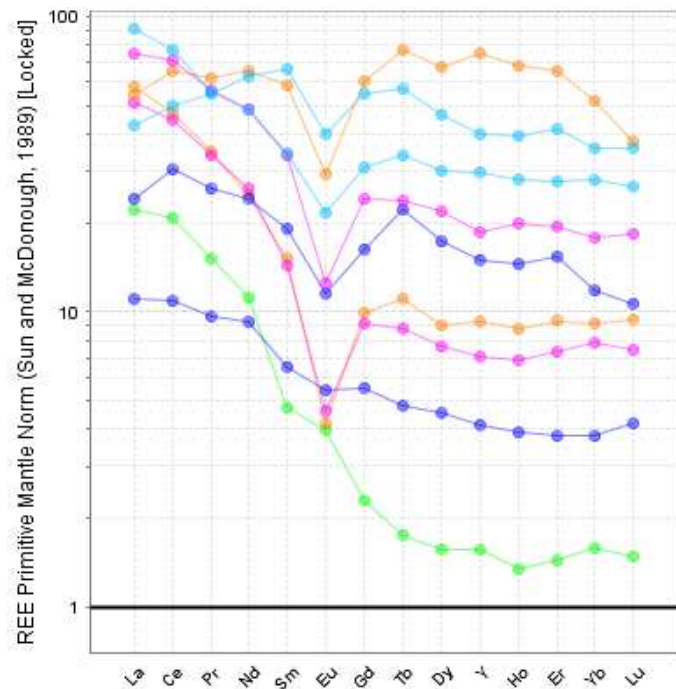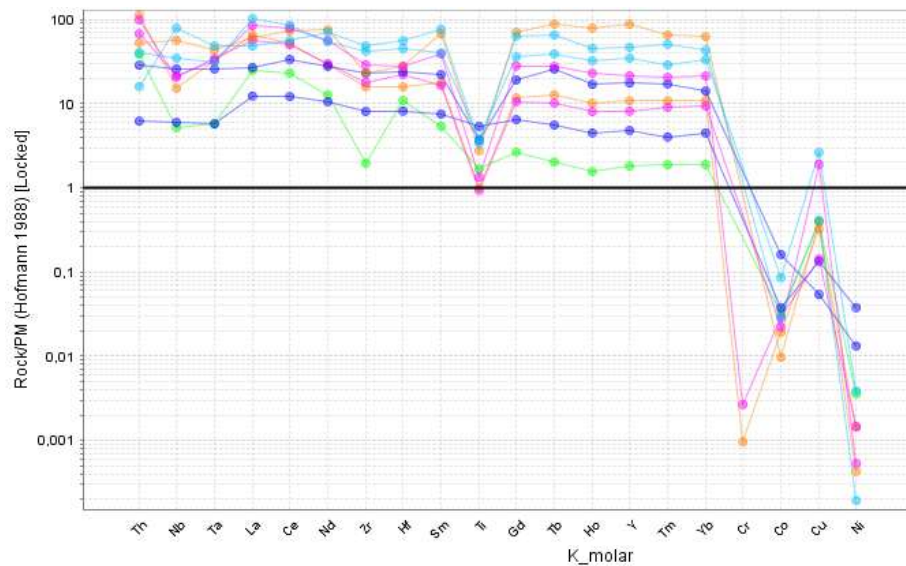

## Sodagranophyre (tonalite) of Lac Doré Complex

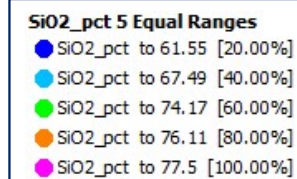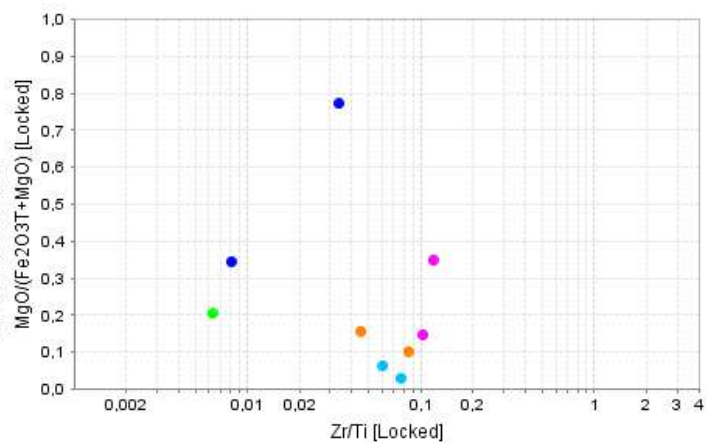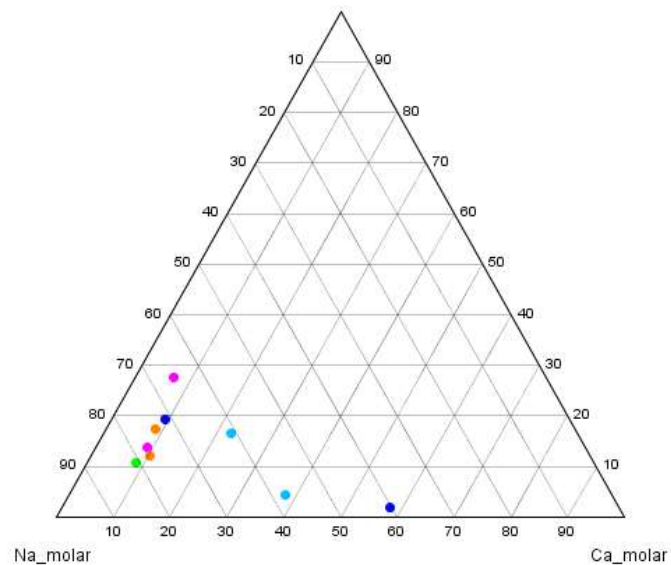

## Rock names (field)

Tonalite

## Western Abitibi Subprovince

(OGS dataset)

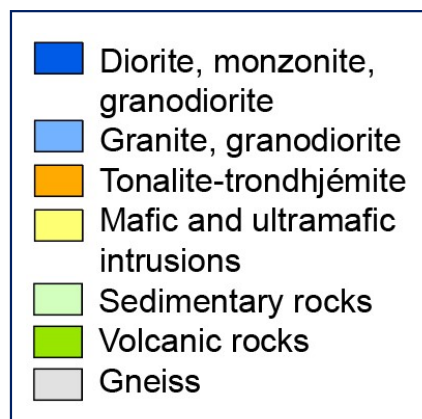

**Figure 1** (see manuscript for details)

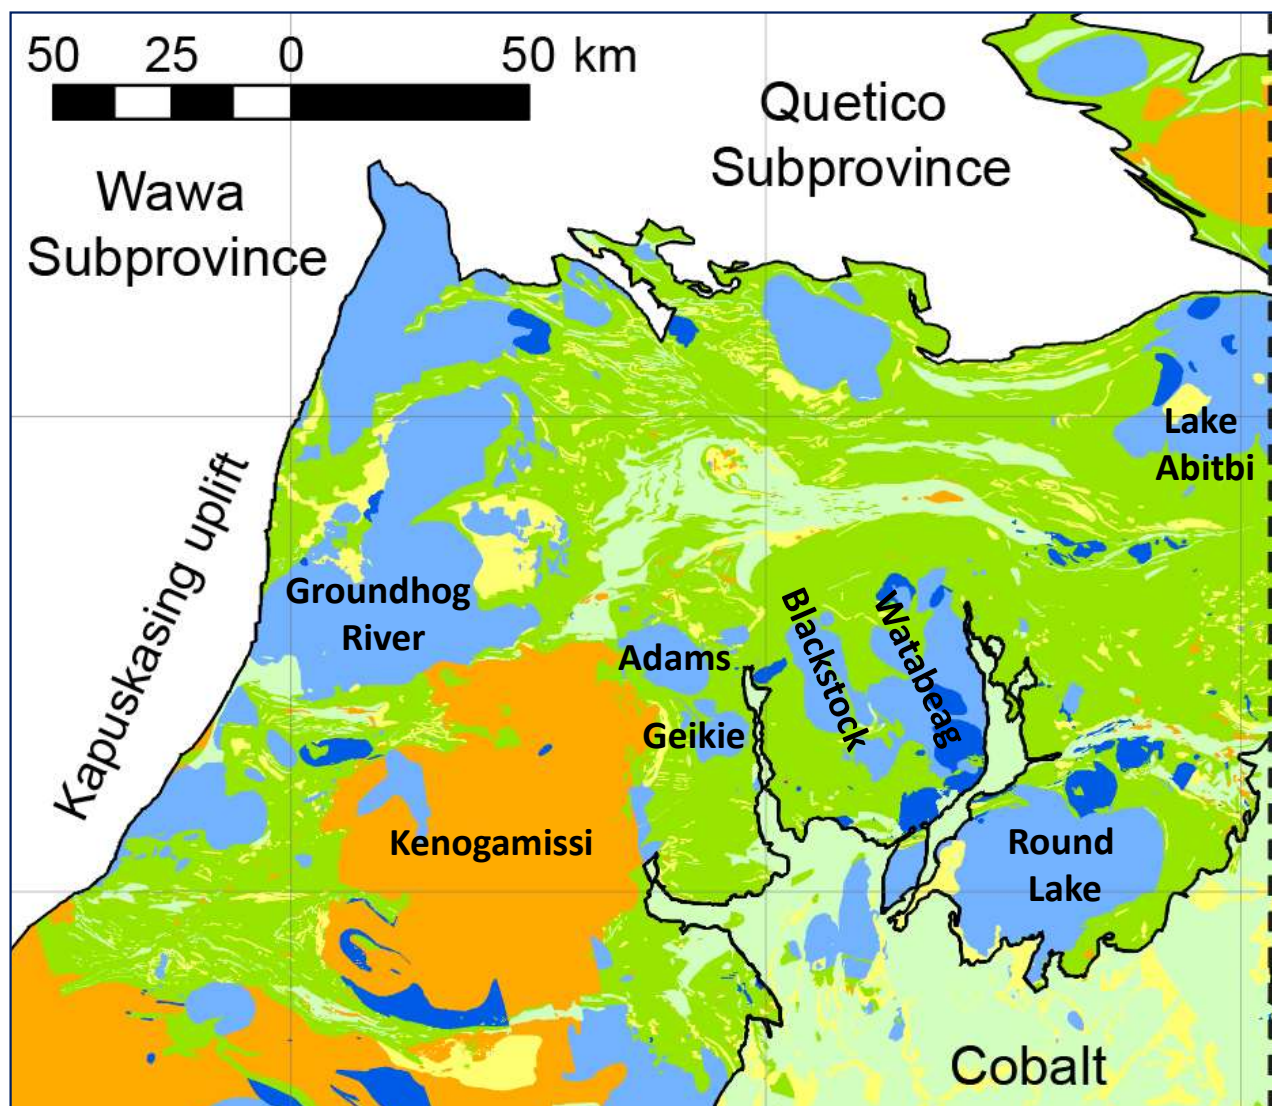



REE Primitive Mantle Norm (Sun and McDonough, 1989) [Locked]

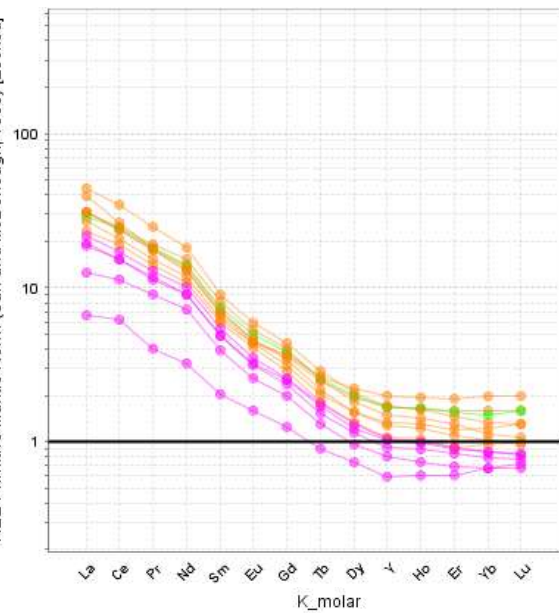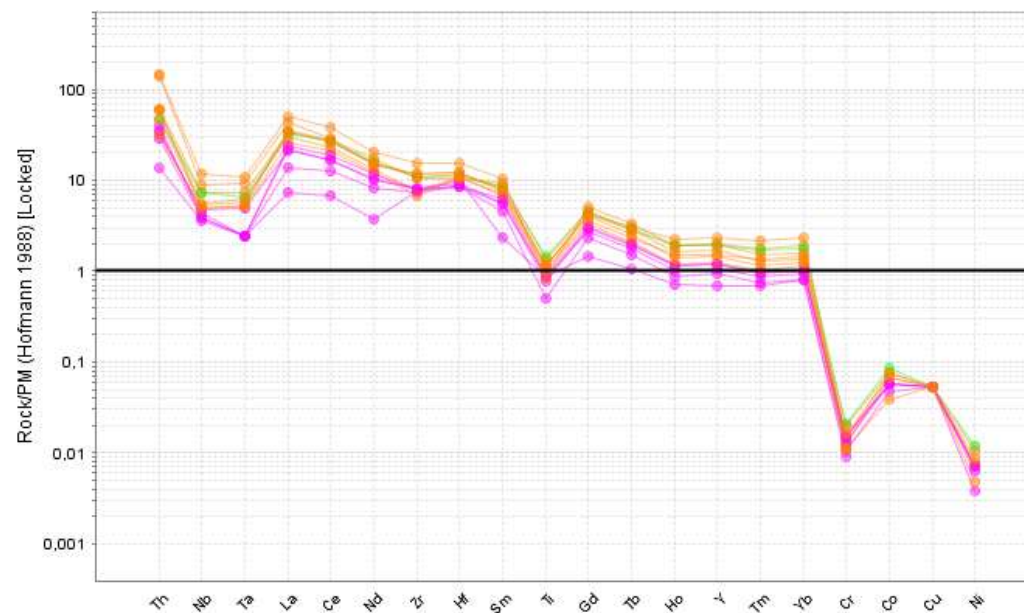

## Watabeag batholith

- SiO<sub>2</sub>\_pct 5 Equal Ranges**
- Default Colour
  - SiO<sub>2</sub>\_pct to 63.25 [20.00%]
  - SiO<sub>2</sub>\_pct to 67.5 [40.00%]
  - SiO<sub>2</sub>\_pct to 69.23 [60.00%]
  - SiO<sub>2</sub>\_pct to 70.81 [80.00%]
  - SiO<sub>2</sub>\_pct to 76.9 [100.00%]

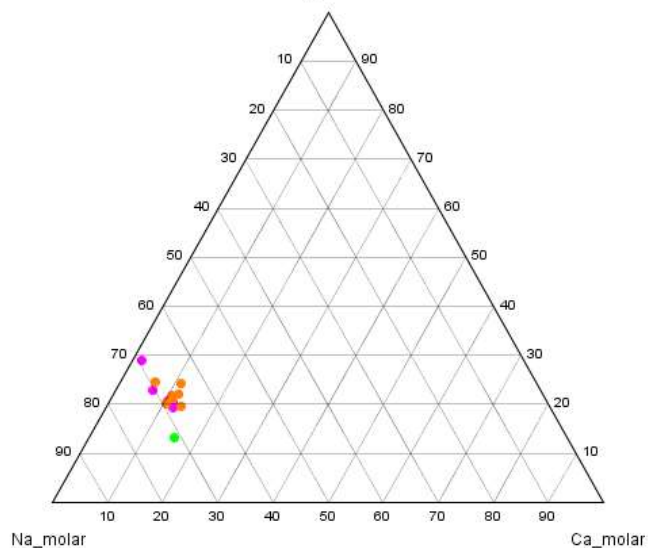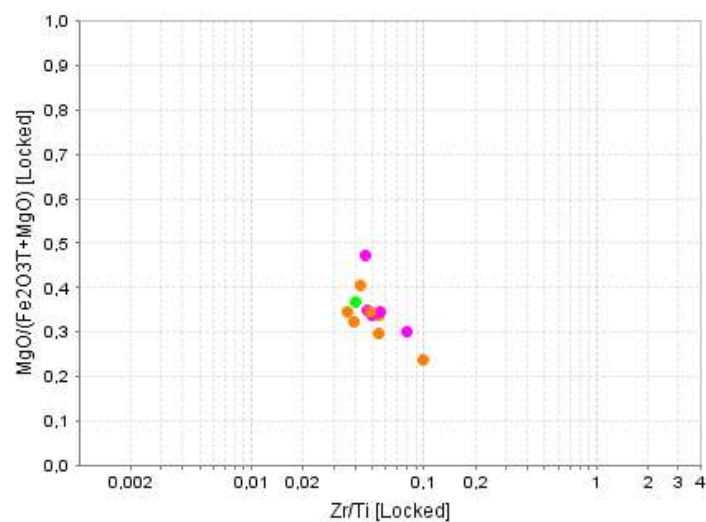

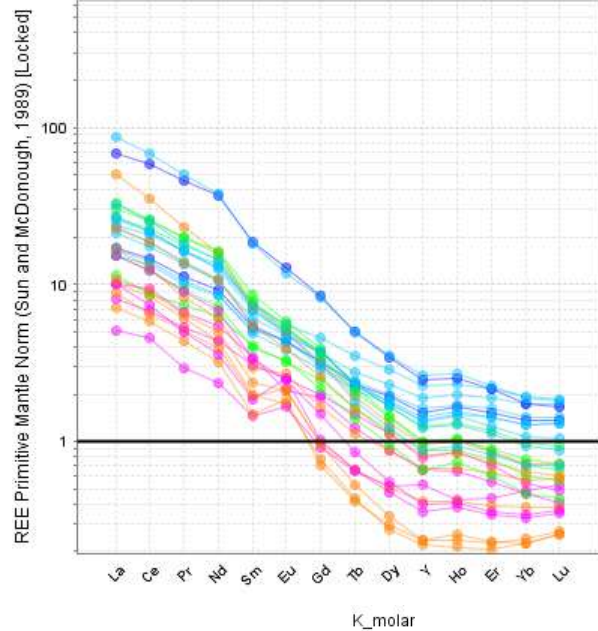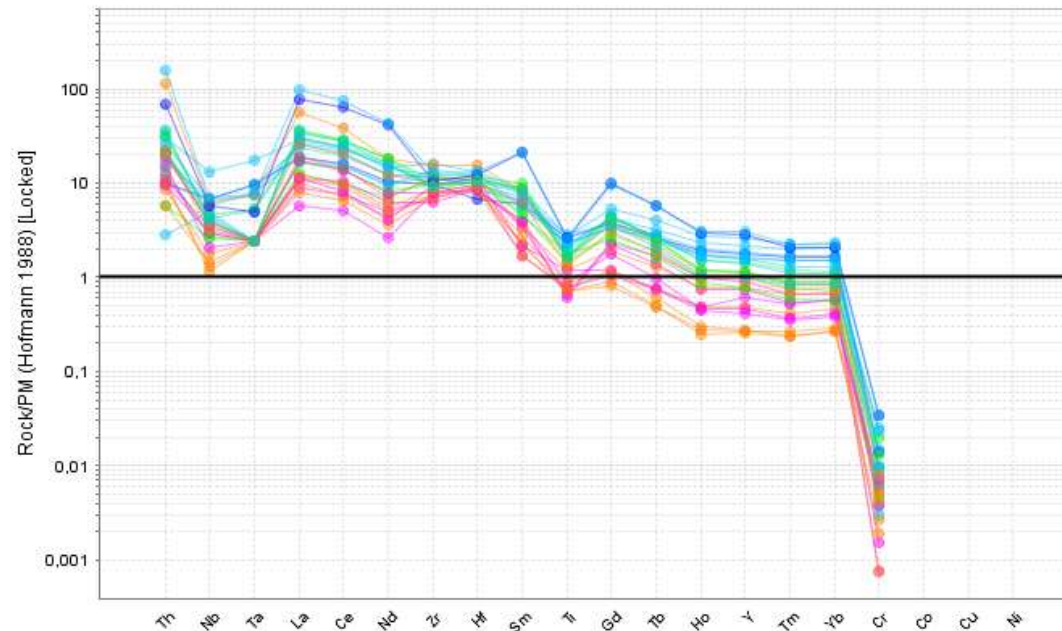

## Round Lake batholith

- SiO<sub>2</sub>\_pct 5 Equal Ranges**
- Default Colour
  - SiO<sub>2</sub>\_pct to 63.25 [20.00%]
  - SiO<sub>2</sub>\_pct to 67.5 [40.00%]
  - SiO<sub>2</sub>\_pct to 69.23 [60.00%]
  - SiO<sub>2</sub>\_pct to 70.81 [80.00%]
  - SiO<sub>2</sub>\_pct to 76.9 [100.00%]

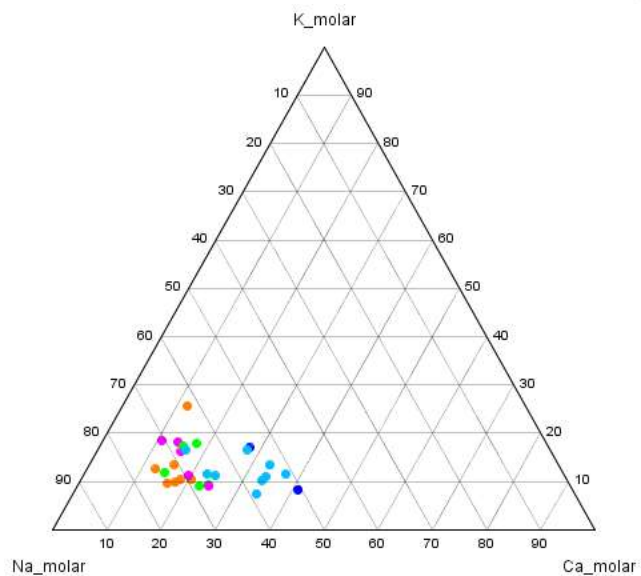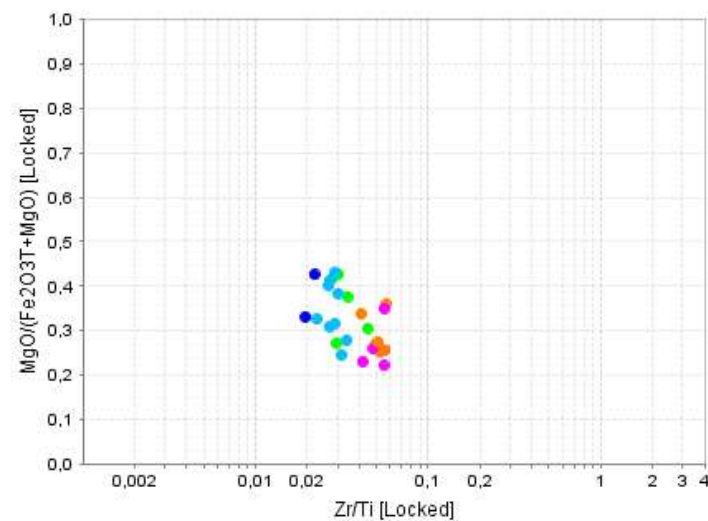



REE Primitive Mantle Norm (Sun and McDonough, 1989) [Locked]

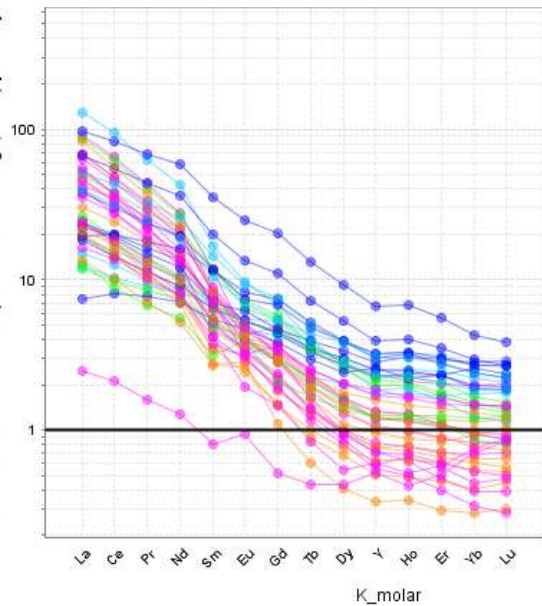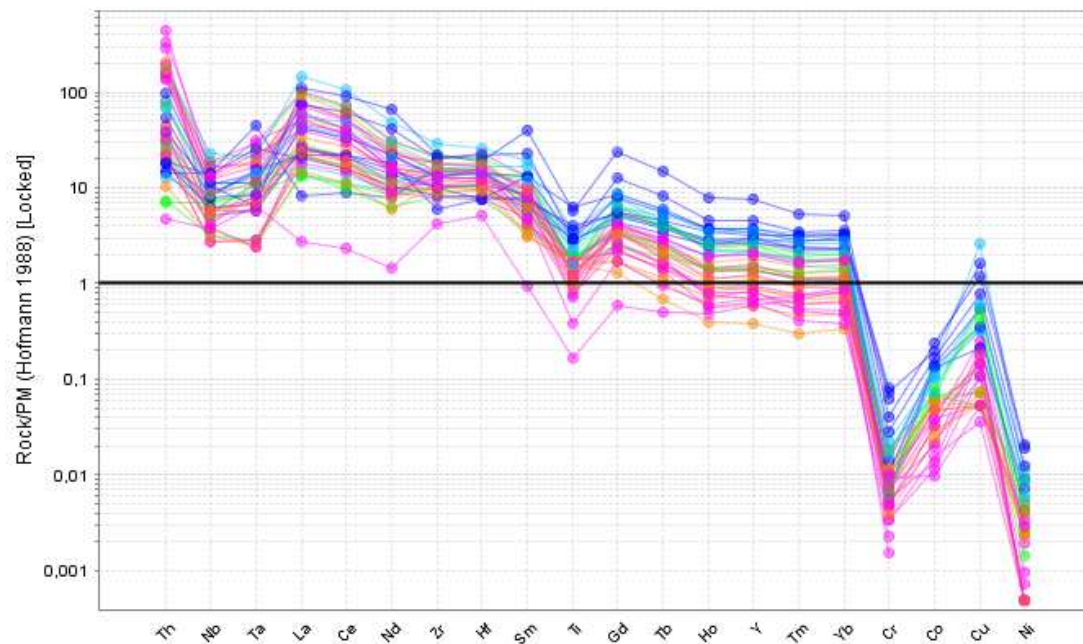

## Kenogamissi batholith

### SiO<sub>2</sub>\_pct 5 Equal Ranges

- Default Colour
- SiO<sub>2</sub>\_pct to 63.25 [20.00%]
- SiO<sub>2</sub>\_pct to 67.5 [40.00%]
- SiO<sub>2</sub>\_pct to 69.23 [60.00%]
- SiO<sub>2</sub>\_pct to 70.81 [80.00%]
- SiO<sub>2</sub>\_pct to 76.9 [100.00%]

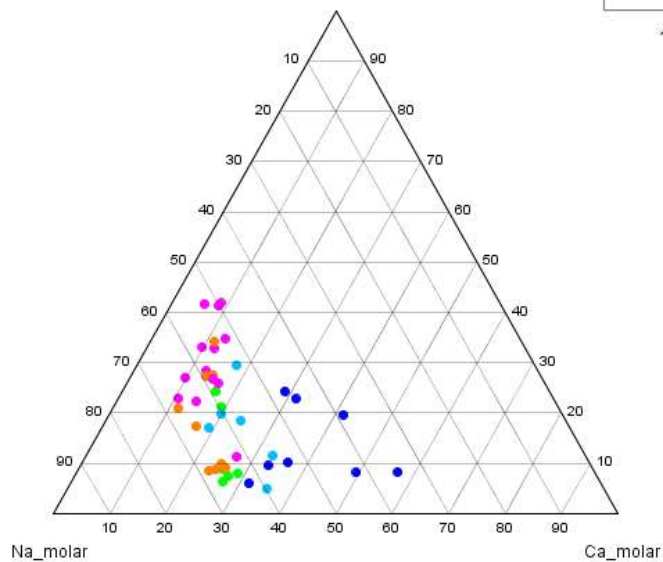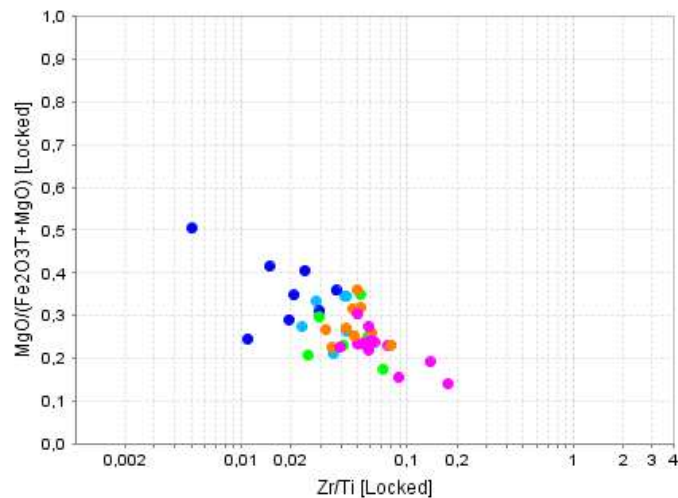

REE Primitive Mantle Norm (Sun and McDonough, 1989) [Locked]

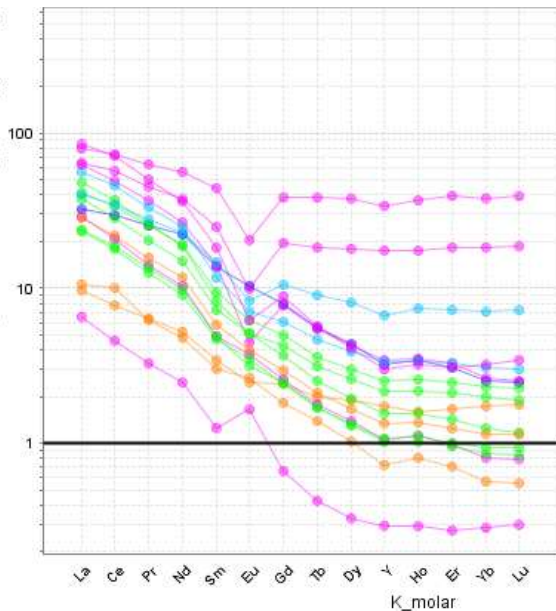

Rock/PM (Hofmann 1988) [Locked]

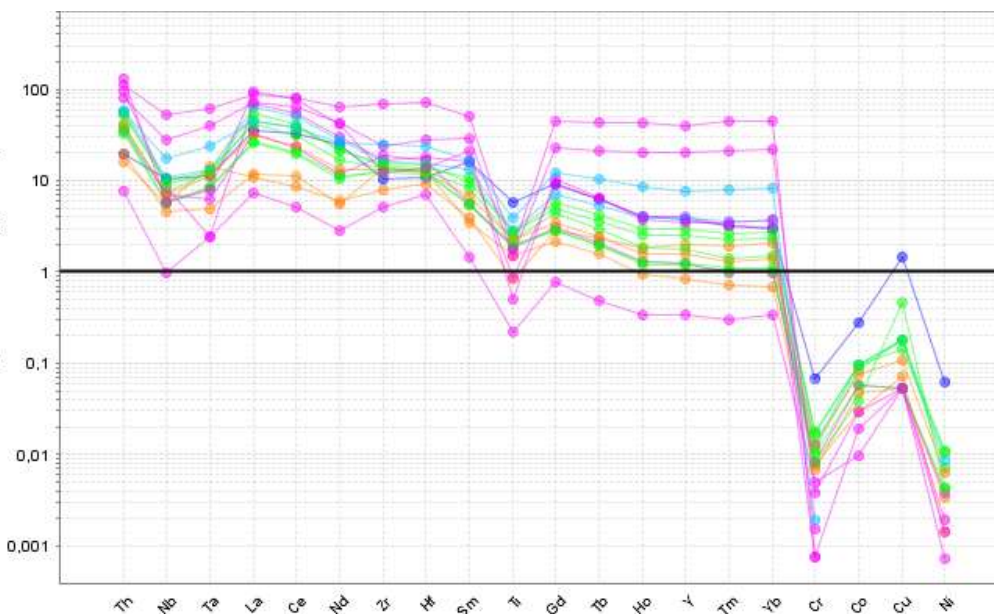

## Groundhog River batholith

### SiO<sub>2</sub>\_pct 5 Equal Ranges

- Default Colour
- SiO<sub>2</sub>\_pct to 63.25 [20.00%]
- SiO<sub>2</sub>\_pct to 67.5 [40.00%]
- SiO<sub>2</sub>\_pct to 69.23 [60.00%]
- SiO<sub>2</sub>\_pct to 70.81 [80.00%]
- SiO<sub>2</sub>\_pct to 76.9 [100.00%]

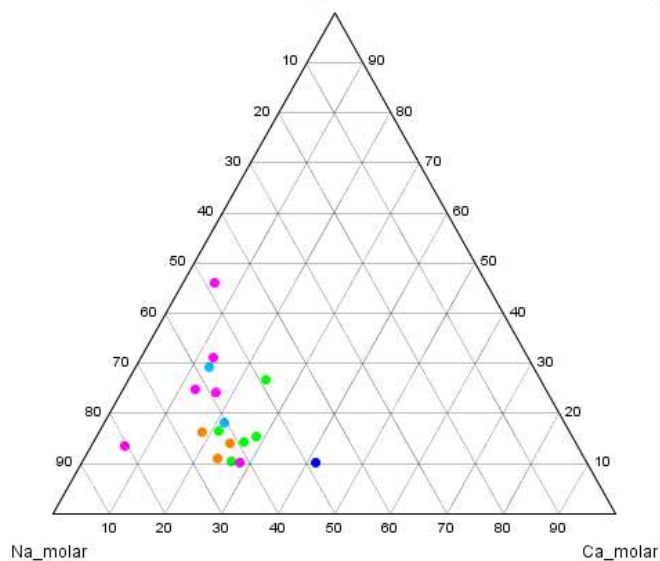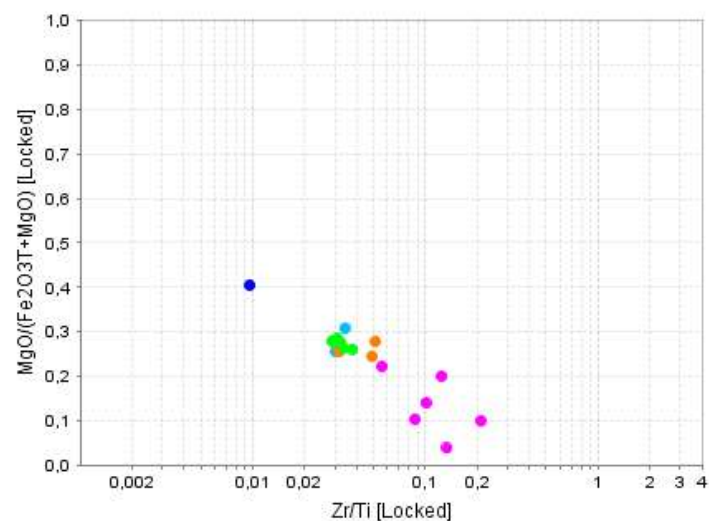



REE Primitive Mantle Norm (Sun and McDonough, 1989) [Locked]

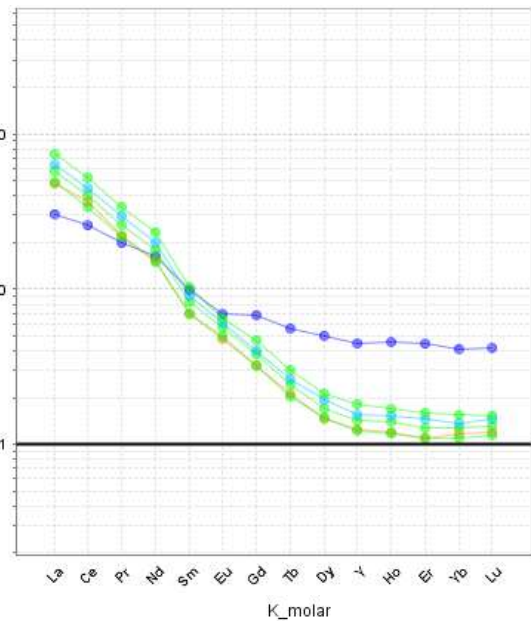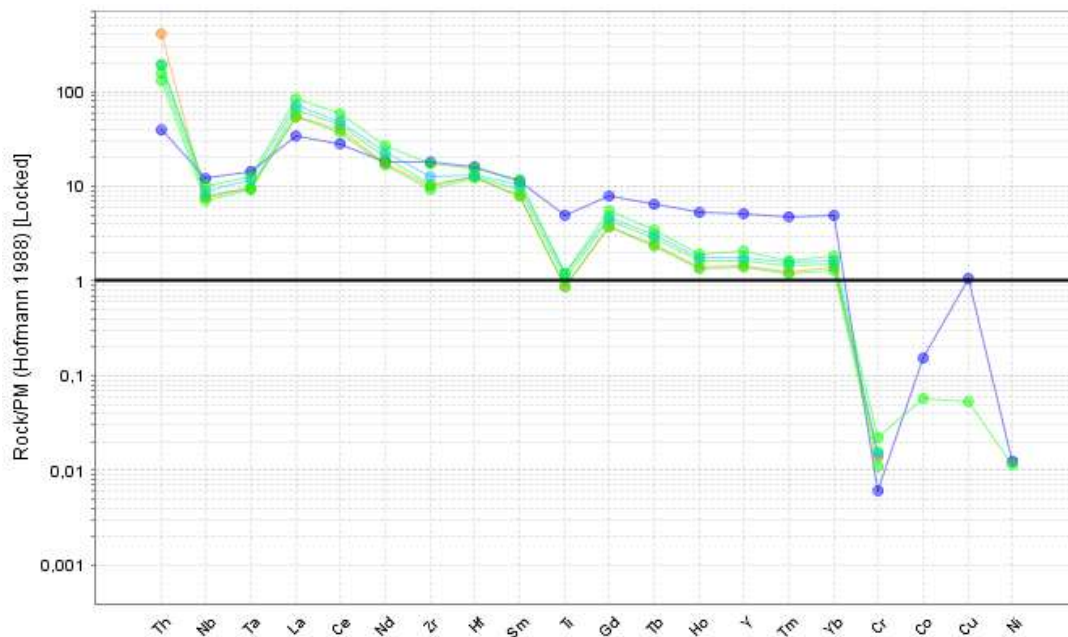

Geikie  
pluton

SiO<sub>2</sub>\_pct 5 Equal Ranges

- Default Colour
- SiO<sub>2</sub>\_pct to 63.25 [20.00%]
- SiO<sub>2</sub>\_pct to 67.5 [40.00%]
- SiO<sub>2</sub>\_pct to 69.23 [60.00%]
- SiO<sub>2</sub>\_pct to 70.81 [80.00%]
- SiO<sub>2</sub>\_pct to 76.9 [100.00%]

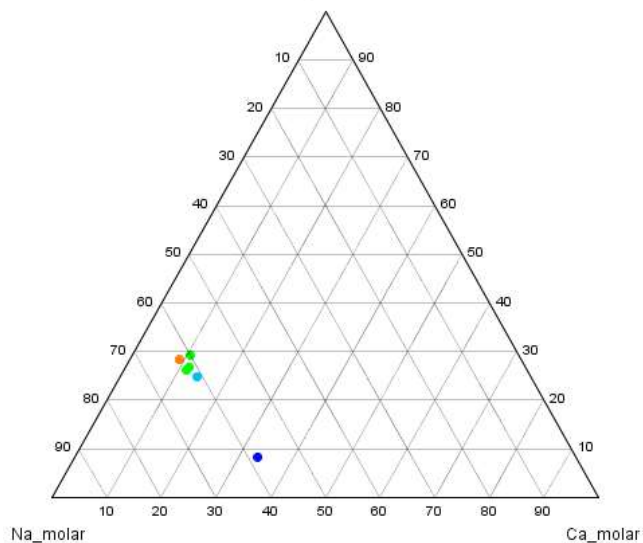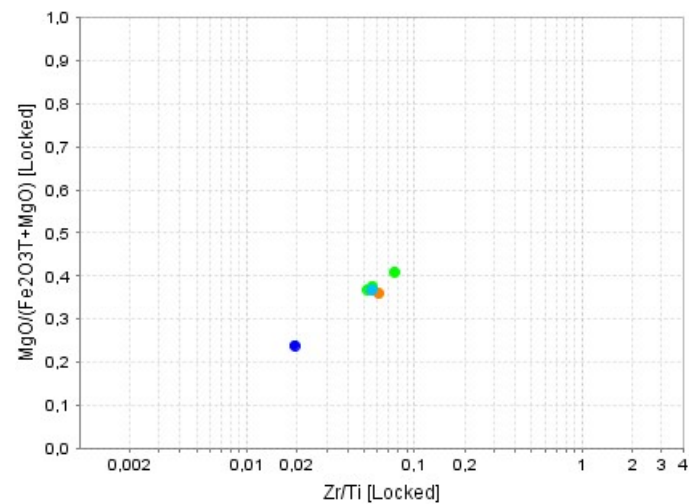

REE Primitive Mantle Norm (Sun and McDonough, 1989) [Locked]

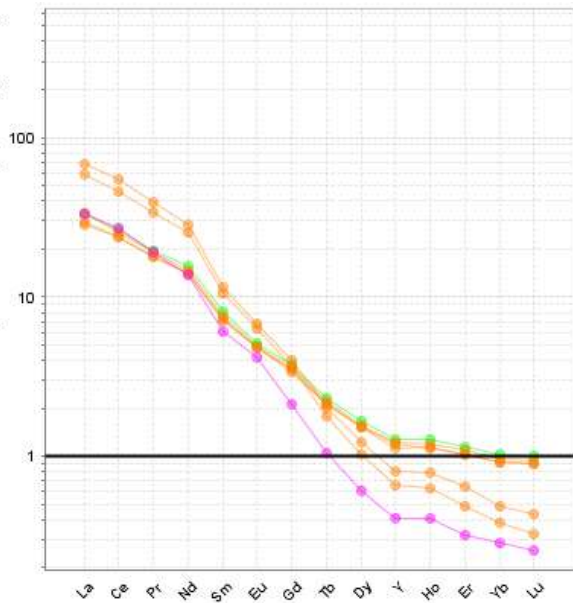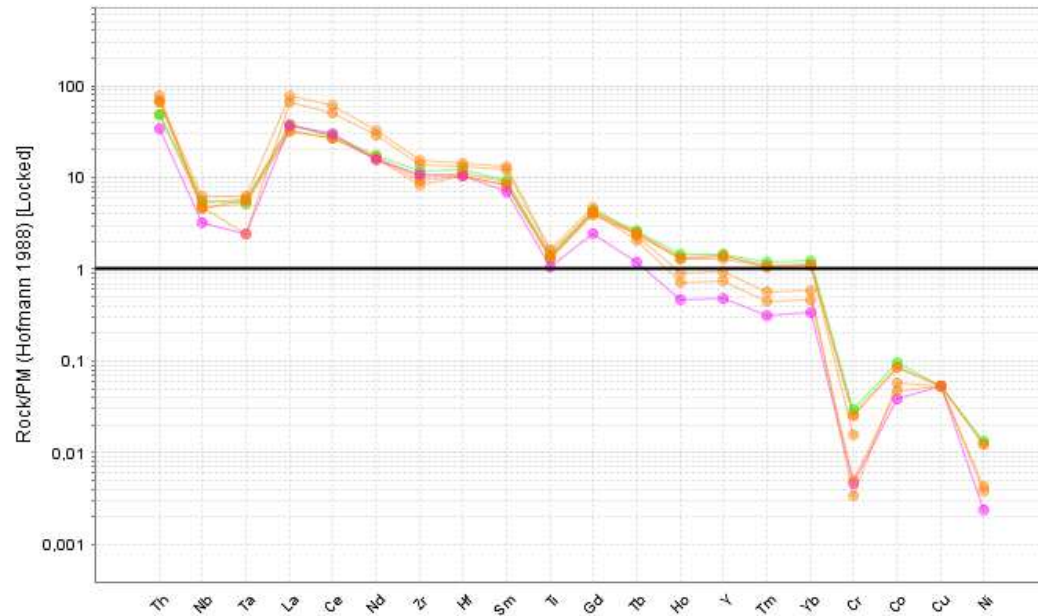

## Blackstock pluton

### SiO<sub>2</sub>\_pct 5 Equal Ranges

- Default Colour
- SiO<sub>2</sub>\_pct to 63.25 [20.00%]
- SiO<sub>2</sub>\_pct to 67.5 [40.00%]
- SiO<sub>2</sub>\_pct to 69.23 [60.00%]
- SiO<sub>2</sub>\_pct to 70.81 [80.00%]
- SiO<sub>2</sub>\_pct to 76.9 [100.00%]

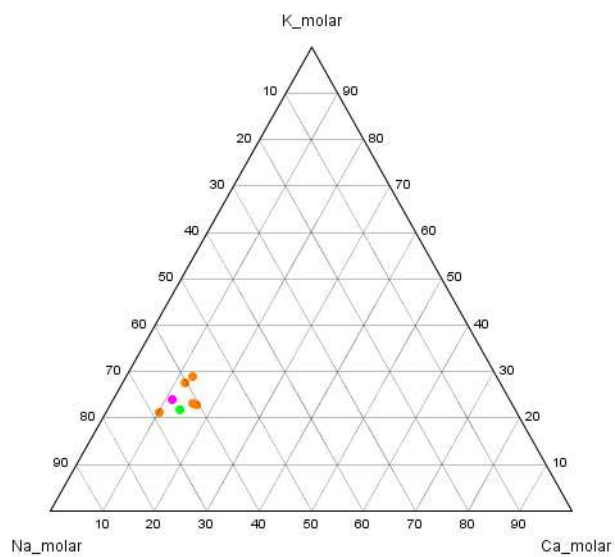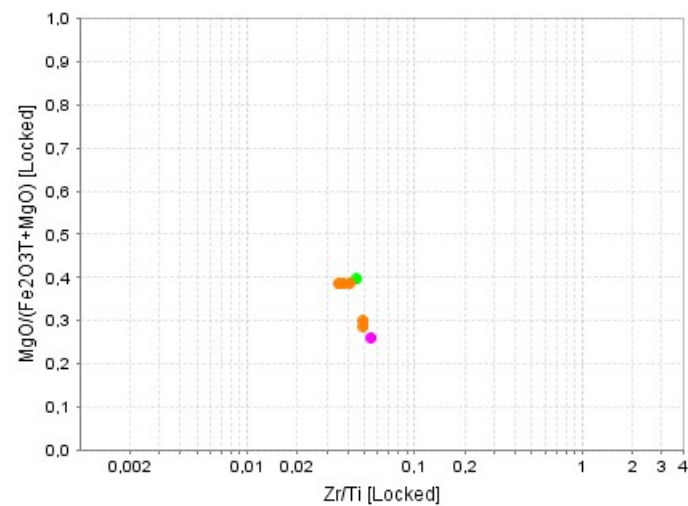



REE Primitive Mantle Norm (Sun and McDonough, 1989) [Locked]

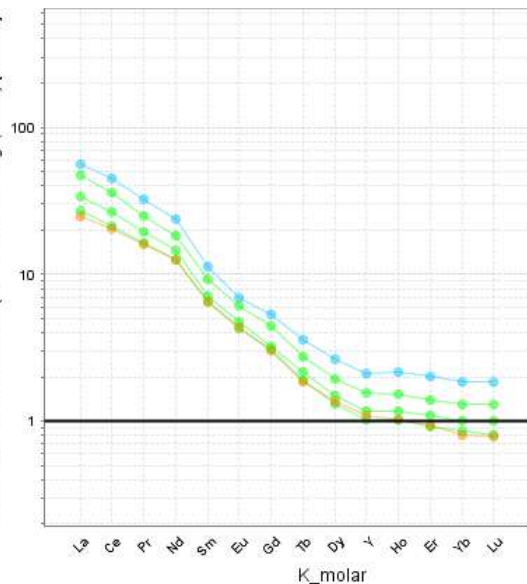

Rock/PM (Hofmann 1988) [Locked]

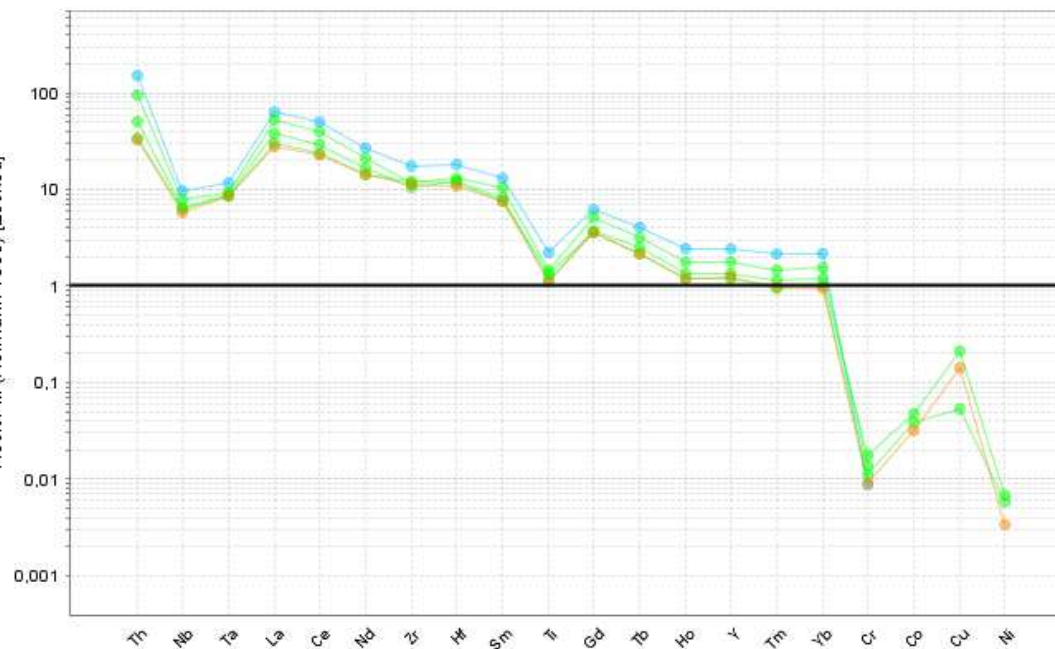

## Adams pluton

### SiO<sub>2</sub>\_pct 5 Equal Ranges

- Default Colour
- SiO<sub>2</sub>\_pct to 63.25 [20.00%]
- SiO<sub>2</sub>\_pct to 67.5 [40.00%]
- SiO<sub>2</sub>\_pct to 69.23 [60.00%]
- SiO<sub>2</sub>\_pct to 70.81 [80.00%]
- SiO<sub>2</sub>\_pct to 76.9 [100.00%]

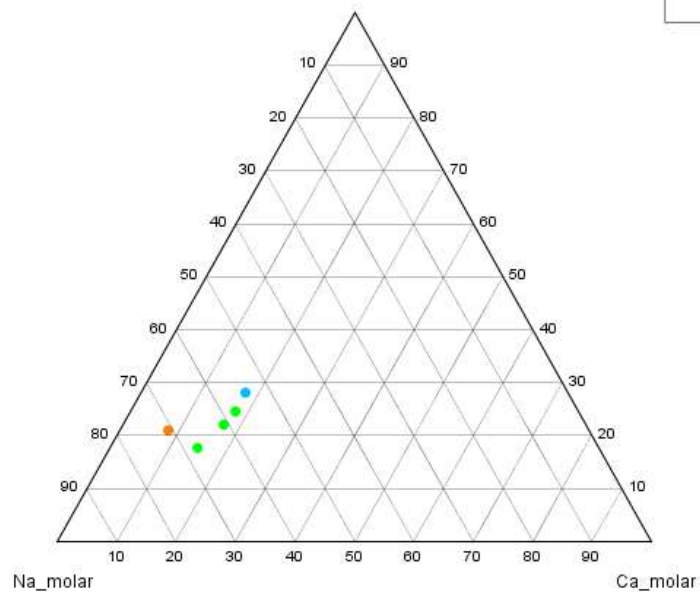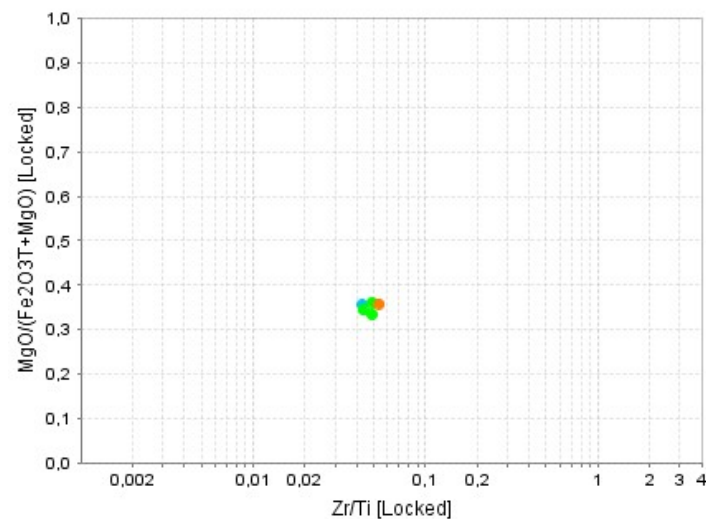

Supplement: s1 [file s1]
